# Supplementary material for: Comparative Genomic Analysis Reveals Gene Content Diversity, Phylogenomic Contour, Putative Virulence Determinants, and Potential Diagnostic Markers within Pythium insidiosum Traits
Source: MDPI journal article supplement (doi:10.3390/jof9020169), 2023-01-27
Supplement: s1 [file s1]

**Supplementary Table S2.** BLAST search hits of the *P. insidiosum*-specific Core 2 gene-translated proteins against the NCBI database.

| Query gene ID   | Hit ID         | Hit Description [Organism]                                                  | Alignment Sequence Identity (%) | Query Alignment Coverage (%) | Hit Alignment Coverage (%) |
|-----------------|----------------|-----------------------------------------------------------------------------|---------------------------------|------------------------------|----------------------------|
| p-cluster001303 | KAE8998458.1   | hypothetical protein PF011_g15043 [Phytophthora fragariae]                  | 50.00                           | 83.02                        | 61.29                      |
| p-cluster001728 | TMW60999.1     | hypothetical protein Poli38472_014460 [Pythium oligandrum]                  | 50.00                           | 77.27                        | 7.92                       |
| p-cluster018222 | TMW69373.1     | hypothetical protein Poli38472_001529 [Pythium oligandrum]                  | 62.93                           | 71.65                        | 74.32                      |
| p-cluster039179 | TMW59523.1     | hypothetical protein Poli38472_004592 [Pythium oligandrum]                  | 44.39                           | 100.00                       | 100.00                     |
| p-cluster039866 | KAG2788710.1   | hypothetical protein Pcac1_g1988 [Phytophthora cactorum]                    | 28.45                           | 78.92                        | 65.71                      |
| p-cluster050845 | CCI42269.1     | unnamed protein product [Albugo candida]                                    | 58.49                           | 56.06                        | 78.24                      |
| p-cluster054880 | RLN81655.1     | hypothetical protein BBJ28_00023336 [Nothophytophthora sp. Chile5]          | 44.44                           | 40.98                        | 92.71                      |
| p-cluster059876 | ETK77921.1     | hypothetical protein, variant 9 [Phytophthora parasitica]                   | 34.79                           | 73.56                        | 90.72                      |
| p-cluster065519 | KAE9260640.1   | hypothetical protein PF008_g33055, partial [Phytophthora fragariae]         | 35.86                           | 75.92                        | 65.44                      |
| p-cluster087539 | TMW61198.1     | hypothetical protein Poli38472_013661 [Pythium oligandrum]                  | 37.90                           | 61.54                        | 57.94                      |
| p-cluster100908 | KAE8881855.1   | hypothetical protein PF003_g34081 [Phytophthora fragariae]                  | 36.91                           | 94.19                        | 57.65                      |
| p-cluster102076 | TMW57199.1     | hypothetical protein Poli38472_003124 [Pythium oligandrum]                  | 51.41                           | 99.59                        | 7.50                       |
| p-cluster102759 | TMW64513.1     | hypothetical protein Poli38472_011393 [Pythium oligandrum]                  | 37.88                           | 93.80                        | 90.93                      |
| p-cluster142193 | GAX93486.1     | leukotriene A-4 hydrolase/aminopeptidase [Pythium insidiosum]               | 92.86                           | 100.00                       | 30.52                      |
| p-cluster147664 | KAE8971438.1   | hypothetical protein PR002_g26828 [Phytophthora rubi]                       | 38.14                           | 71.32                        | 100.00                     |
| p-cluster163192 | GAX99532.1     | CMGC/MAPK protein kinase [Pythium insidiosum]                               | 86.32                           | 91.33                        | 44.42                      |
| p-cluster164819 | GAY06237.1     | 30S ribosomal protein S5, putative [Pythium insidiosum]                     | 92.90                           | 100.00                       | 53.99                      |
| p-cluster180945 | TMW68037.1     | hypothetical protein Poli38472_007709 [Pythium oligandrum]                  | 36.46                           | 96.15                        | 17.08                      |
| p-cluster183229 | TMW66283.1     | hypothetical protein Poli38472_004048 [Pythium oligandrum]                  | 64.06                           | 44.87                        | 28.65                      |
| p-cluster203568 | RLN46173.1     | hypothetical protein BBJ28_00024994, partial [Nothophytophthora sp. Chile5] | 47.62                           | 40.65                        | 24.80                      |
| p-cluster204558 | TMW62862.1     | hypothetical protein Poli38472_005480 [Pythium oligandrum]                  | 76.63                           | 100.00                       | 100.00                     |
| p-cluster204650 | RLN86472.1     | hypothetical protein BBJ28_00004694, partial [Nothophytophthora sp. Chile5] | 47.44                           | 16.89                        | 39.90                      |
| p-cluster204835 | KAG7391207.1   | hypothetical protein PHYPSEUDO_005568 [Phytophthora pseudosyringae]         | 29.91                           | 35.27                        | 97.74                      |
| p-cluster204852 | TMW63771.1     | hypothetical protein Poli38472_002712 [Pythium oligandrum]                  | 68.01                           | 37.92                        | 99.74                      |
| p-cluster204941 | GAX92592.1     | phox-like domain containing protein [Pythium insidiosum]                    | 100.00                          | 76.07                        | 29.11                      |
| p-cluster204950 | KAH7463611.1   | hypothetical protein KRP23_12805 [Phytophthora ramorum]                     | 49.14                           | 20.42                        | 63.33                      |
| p-cluster205114 | GAX92781.1     | TKL protein kinase [Pythium insidiosum]                                     | 100.00                          | 100.00                       | 100.00                     |
| p-cluster205359 | TMW66178.1     | hypothetical protein Poli38472_003943 [Pythium oligandrum]                  | 46.43                           | 98.25                        | 18.30                      |
| p-cluster205371 | RLN65146.1     | hypothetical protein BBJ29_008150 [Phytophthora kernoviae]                  | 36.02                           | 77.33                        | 44.88                      |
| p-cluster205709 | TMW63406.1     | hypothetical protein Poli38472_002347 [Pythium oligandrum]                  | 58.86                           | 54.74                        | 16.18                      |
| p-cluster206806 | TMW60227.1     | hypothetical protein Poli38472_000269 [Pythium oligandrum]                  | 69.52                           | 58.53                        | 93.88                      |
| p-cluster206897 | GAX94545.1     | choline dehydrogenase [Pythium insidiosum]                                  | 100.00                          | 100.00                       | 100.00                     |
| p-cluster207288 | TMW64647.1     | hypothetical protein Poli38472_011527 [Pythium oligandrum]                  | 54.89                           | 48.94                        | 86.38                      |
| p-cluster207786 | TMW67610.1     | hypothetical protein Poli38472_011230 [Pythium oligandrum]                  | 57.78                           | 12.06                        | 3.08                       |
| p-cluster207788 | TMW67572.1     | hypothetical protein Poli38472_011192 [Pythium oligandrum]                  | 34.64                           | 47.72                        | 22.45                      |
| p-cluster207851 | GAX95495.1     | cysteine-rich protein [Pythium insidiosum]                                  | 81.67                           | 88.24                        | 86.03                      |
| p-cluster207871 | TYZ61662.1     | hypothetical protein PybrP1_010661 [[Pythium] brassicae (nom. inval.)]      | 69.23                           | 100.00                       | 100.00                     |
| p-cluster207936 | GAX95617.1     | peptidyl-prolyl cis-trans isomerase-like 3 [Pythium insidiosum]             | 100.00                          | 100.00                       | 100.00                     |
| p-cluster207937 | GAX95626.1     | transmembrane protein putative [Pythium insidiosum]                         | 100.00                          | 100.00                       | 100.00                     |
| p-cluster207977 | GAX95668.1     | replication factor C subunit 5 [Pythium insidiosum]                         | 100.00                          | 100.00                       | 100.00                     |
| p-cluster208074 | GAX95775.1     | 60S ribosomal protein [Pythium insidiosum]                                  | 62.32                           | 89.47                        | 8.72                       |
| p-cluster208130 | XP_008915474.1 | hypothetical protein PPTG_18978 [Phytophthora parasitica INRA-310]          | 34.03                           | 95.77                        | 84.10                      |
| p-cluster208270 | TMW67282.1     | hypothetical protein Poli38472_012398 [Pythium oligandrum]                  | 70.21                           | 43.52                        | 6.29                       |
| p-cluster208296 | TMW66429.1     | hypothetical protein Poli38472_004194 [Pythium oligandrum]                  | 57.97                           | 45.70                        | 15.80                      |
| p-cluster208339 | TMW66389.1     | hypothetical protein Poli38472_004154 [Pythium oligandrum]                  | 59.60                           | 47.14                        | 23.13                      |
| p-cluster208391 | GAX96069.1     | 60S ribosomal protein L39-like protein [Pythium insidiosum]                 | 100.00                          | 100.00                       | 100.00                     |
| p-cluster208491 | ETP01743.1     | hypothetical protein F441_21074 [Phytophthora parasitica CJ01A1]            | 25.00                           | 82.22                        | 62.63                      |
| p-cluster208867 | TMW66766.1     | hypothetical protein Poli38472_014078 [Pythium oligandrum]                  | 38.50                           | 85.64                        | 83.12                      |
| p-cluster209018 | TMW56063.1     | hypothetical protein Poli38472_008711 [Pythium oligandrum]                  | 56.63                           | 68.60                        | 35.04                      |
| p-cluster209655 | XP_033123387.1 | mucin-5AC-like, partial [Anneissia japonica]                                | 48.77                           | 26.49                        | 20.80                      |
| p-cluster210093 | TMW59388.1     | hypothetical protein Poli38472_004457 [Pythium oligandrum]                  | 63.60                           | 52.03                        | 87.36                      |
| p-cluster210140 | TMW59280.1     | hypothetical protein Poli38472_004349 [Pythium oligandrum]                  | 78.57                           | 99.12                        | 98.58                      |
| p-cluster210292 | TYZ60173.1     | hypothetical protein PybrP1_012082 [[Pythium] brassicae (nom. inval.)]      | 86.89                           | 95.31                        | 100.00                     |
| p-cluster210431 | GAX98074.1     | TKL/DRK protein kinase [Pythium insidiosum]                                 | 77.24                           | 100.00                       | 85.26                      |
| p-cluster210653 | GAX95883.1     | pepsin-like aspartic protease A1 [Pythium insidiosum]                       | 90.87                           | 90.65                        | 57.93                      |

|                 |              |                                                                                |        |        |        |
|-----------------|--------------|--------------------------------------------------------------------------------|--------|--------|--------|
| p-cluster210803 | GAY06760.1   | G-protein coupled receptor [Pythium insidiosum]                                | 99.70  | 62.16  | 62.63  |
| p-cluster210848 | TMW67472.1   | hypothetical protein Poli38472_011092 [Pythium oligandrum]                     | 33.60  | 96.32  | 97.80  |
| p-cluster210897 | GAX98572.1   | TKL protein kinase [Pythium insidiosum]                                        | 100.00 | 100.00 | 100.00 |
| p-cluster211408 | TMW55760.1   | hypothetical protein Poli38472_010642 [Pythium oligandrum]                     | 55.51  | 82.53  | 44.42  |
| p-cluster211605 | GAY04368.1   | calpain-like protein [Pythium insidiosum]                                      | 70.27  | 57.81  | 4.44   |
| p-cluster211849 | GAX99548.1   | glycine cleavage system T protein [Pythium insidiosum]                         | 100.00 | 100.00 | 100.00 |
| p-cluster211896 | TMW58287.1   | hypothetical protein Poli38472_011875 [Pythium oligandrum]                     | 53.85  | 54.82  | 9.89   |
| p-cluster212213 | TMW68886.1   | hypothetical protein Poli38472_001042 [Pythium oligandrum]                     | 62.77  | 94.00  | 26.15  |
| p-cluster212607 | GAX96425.1   | heat shock transcription factor [Pythium insidiosum]                           | 63.89  | 100.00 | 68.84  |
| p-cluster212859 | KAF1315764.1 | Mitochondrial protein, partial [Globisporangium splendens]                     | 66.03  | 99.37  | 99.36  |
| p-cluster212877 | TMW62170.1   | hypothetical protein Poli38472_009663 [Pythium oligandrum]                     | 38.90  | 100.00 | 94.81  |
| p-cluster213051 | TMW64781.1   | hypothetical protein Poli38472_011661 [Pythium oligandrum]                     | 83.27  | 47.09  | 22.07  |
| p-cluster213250 | RMX64787.1   | hypothetical protein DD238_006774 [Peronospora effusa]                         | 51.79  | 67.09  | 31.46  |
| p-cluster213566 | TYZ64052.1   | hypothetical protein PybrP1_011910 [[Pythium] brassicae (nom. inval.)]         | 87.18  | 95.12  | 96.30  |
| p-cluster213600 | TMW59944.1   | hypothetical protein Poli38472_005013 [Pythium oligandrum]                     | 58.68  | 33.80  | 38.46  |
| p-cluster213797 | TMW58043.1   | hypothetical protein Poli38472_013517 [Pythium oligandrum]                     | 47.47  | 63.68  | 60.72  |
| p-cluster213849 | TMW63618.1   | hypothetical protein Poli38472_002559 [Pythium oligandrum]                     | 38.40  | 94.70  | 6.12   |
| p-cluster214160 | TMW60882.1   | hypothetical protein Poli38472_000924 [Pythium oligandrum]                     | 27.24  | 83.98  | 41.79  |
| p-cluster214439 | GAY02110.1   | elicitor-like transglutaminase [Pythium insidiosum]                            | 100.00 | 100.00 | 100.00 |
| p-cluster214765 | GAY02426.1   | ribonuclease T2 family protein [Pythium insidiosum]                            | 98.86  | 100.00 | 100.00 |
| p-cluster214900 | GAY03407.1   | phosphatidylinositol 3 and 4-kinase-like protein, partial [Pythium insidiosum] | 100.00 | 92.19  | 7.41   |
| p-cluster214954 | RLN85082.1   | hypothetical protein BBJ28_00001109 [Nothophytophthora sp. Chile5]             | 40.85  | 92.42  | 11.42  |
| p-cluster215005 | TMW64953.1   | hypothetical protein Poli38472_009120 [Pythium oligandrum]                     | 58.39  | 89.51  | 14.27  |
| p-cluster215696 | CAF1092469.1 | unnamed protein product [Didymodactylos carnosus]                              | 35.42  | 35.76  | 91.00  |
| p-cluster216037 | TMW67722.1   | hypothetical protein Poli38472_007394 [Pythium oligandrum]                     | 34.30  | 57.71  | 42.95  |
| p-cluster216082 | TMW59707.1   | hypothetical protein Poli38472_004776 [Pythium oligandrum]                     | 25.06  | 75.72  | 69.43  |
| p-cluster216133 | TMW55321.1   | hypothetical protein Poli38472_013212 [Pythium oligandrum]                     | 50.12  | 92.99  | 81.97  |
| p-cluster216391 | TMW66051.1   | hypothetical protein Poli38472_003816 [Pythium oligandrum]                     | 52.05  | 39.57  | 55.42  |
| p-cluster216745 | TMW65750.1   | hypothetical protein Poli38472_008392 [Pythium oligandrum]                     | 60.45  | 79.91  | 87.50  |
| p-cluster216772 | GAX93845.1   | thioredoxin-like protein, putative [Pythium insidiosum]                        | 98.33  | 18.35  | 30.93  |
| p-cluster216792 | GAY04474.1   | nucleoporin-like protein [Pythium insidiosum]                                  | 100.00 | 100.00 | 100.00 |
| p-cluster216885 | GAY04552.1   | ankyrin [Pythium insidiosum]                                                   | 57.02  | 81.65  | 54.16  |
| p-cluster217076 | KAF4030060.1 | hypothetical protein GN244_ATG18147 [Phytophthora infestans]                   | 94.12  | 100.00 | 45.21  |
| p-cluster217493 | KAI3654286.1 | hypothetical protein MP228_001005 [Amoeboaphelidium protocoecarum]             | 45.61  | 27.27  | 26.89  |
| p-cluster217501 | GAY05172.1   | cystathionine beta-synthase [Pythium insidiosum]                               | 100.00 | 100.00 | 100.00 |
| p-cluster217705 | GAY05379.1   | mucin-21, partial [Pythium insidiosum]                                         | 100.00 | 100.00 | 100.00 |
| p-cluster217794 | GAY05468.1   | Myblike DNA-binding domain containing protein putativ [Pythium insidiosum]     | 100.00 | 100.00 | 100.00 |
| p-cluster217846 | GAX95883.1   | pepsin-like aspartic protease A1 [Pythium insidiosum]                          | 61.80  | 67.96  | 99.77  |
| p-cluster218100 | GAY05357.1   | zinc transporter, putative [Pythium insidiosum]                                | 98.92  | 28.70  | 19.25  |
| p-cluster218139 | ETP49795.1   | hypothetical protein, variant 8 [Phytophthora parasitica P10297]               | 41.59  | 87.50  | 32.38  |
| p-cluster218429 | KAF4041413.1 | Roadblock/LC7 domain [Phytophthora infestans]                                  | 62.81  | 29.16  | 86.51  |
| p-cluster218544 | TMW59482.1   | hypothetical protein Poli38472_004551 [Pythium oligandrum]                     | 46.58  | 98.67  | 15.41  |
| p-cluster218669 | TMW69261.1   | hypothetical protein Poli38472_001417 [Pythium oligandrum]                     | 51.15  | 79.88  | 29.57  |
| p-cluster218727 | GAX97986.1   | putative membrane protein [Pythium insidiosum]                                 | 100.00 | 100.00 | 100.00 |
| p-cluster218838 | KAF1330383.1 | hypothetical protein FI667_g5117, partial [Globisporangium splendens]          | 50.39  | 100.00 | 6.42   |
| p-cluster218863 | RLN96816.1   | hypothetical protein BBJ28_00012064 [Nothophytophthora sp. Chile5]             | 35.92  | 98.96  | 3.38   |
| p-cluster218935 | TMW61209.1   | hypothetical protein Poli38472_013672 [Pythium oligandrum]                     | 29.38  | 74.13  | 25.52  |
| p-cluster219169 | TMW56750.1   | hypothetical protein Poli38472_006760 [Pythium oligandrum]                     | 50.00  | 51.97  | 4.10   |
| p-cluster219352 | KAH7468750.1 | hypothetical protein KRP23_11126 [Phytophthora ramorum]                        | 56.92  | 78.31  | 51.59  |
| p-cluster219357 | TMW56261.1   | hypothetical protein Poli38472_008909 [Pythium oligandrum]                     | 43.96  | 81.98  | 20.54  |
| p-cluster219554 | KAG6576592.1 | rho gtpase activating protein 2 [Phytophthora cinnamomi]                       | 46.24  | 41.10  | 18.45  |
| p-cluster219591 | GAX95356.1   | CUG-BP- and ETR-3-like factor, putative [Pythium insidiosum]                   | 76.47  | 87.50  | 19.54  |
| p-cluster219755 | TMW57286.1   | hypothetical protein Poli38472_003211 [Pythium oligandrum]                     | 51.85  | 90.00  | 16.35  |
| p-cluster219914 | TMW58704.1   | hypothetical protein Poli38472_010263 [Pythium oligandrum]                     | 56.62  | 76.79  | 38.02  |
| p-cluster220007 | RLN61831.1   | hypothetical protein BBP00_00005153 [Phytophthora kernoviae]                   | 57.55  | 88.24  | 8.91   |
| p-cluster220156 | GAX98858.1   | peptidyl-prolyl cis-trans isomerase D [Pythium insidiosum]                     | 87.11  | 56.03  | 96.52  |
| p-cluster220205 | TMW66386.1   | hypothetical protein Poli38472_004151 [Pythium oligandrum]                     | 35.50  | 61.25  | 49.21  |
| p-cluster220386 | TMW63531.1   | hypothetical protein Poli38472_002472 [Pythium oligandrum]                     | 35.86  | 78.98  | 25.04  |
| p-cluster220416 | KAG3119242.1 | hypothetical protein PI125_g2181 [Phytophthora idaei]                          | 43.44  | 53.48  | 54.91  |
| p-cluster220625 | TMW66084.1   | hypothetical protein Poli38472_003849 [Pythium oligandrum]                     | 42.71  | 91.00  | 20.67  |
| p-cluster220770 | TMW59710.1   | hypothetical protein Poli38472_004779 [Pythium oligandrum]                     | 53.13  | 40.67  | 93.77  |
| p-cluster220885 | ETK72756.1   | hypothetical protein, variant [Phytophthora parasitica]                        | 39.39  | 54.08  | 36.30  |

|                 |              |                                                                           |        |        |        |
|-----------------|--------------|---------------------------------------------------------------------------|--------|--------|--------|
| p-cluster221015 | GAY03849.1   | transmembrane protein, putative [Pythium insidiosum]                      | 74.76  | 27.84  | 11.56  |
| p-cluster221088 | TMW56348.1   | hypothetical protein Poli38472_006358 [Pythium oligandrum]                | 58.33  | 54.62  | 13.35  |
| p-cluster221106 | GAY00566.1   | DEAD/DEAH box RNA helicase, putative [Pythium insidiosum]                 | 80.75  | 100.00 | 21.11  |
| p-cluster221119 | TMW67307.1   | hypothetical protein Poli38472_012423 [Pythium oligandrum]                | 35.85  | 33.89  | 31.06  |
| p-cluster221149 | TMW63627.1   | hypothetical protein Poli38472_002568 [Pythium oligandrum]                | 64.38  | 50.00  | 8.34   |
| p-cluster221293 | TMW64642.1   | hypothetical protein Poli38472_011522 [Pythium oligandrum]                | 48.11  | 28.16  | 52.36  |
| p-cluster221515 | TMW59271.1   | hypothetical protein Poli38472_004340 [Pythium oligandrum]                | 30.02  | 78.69  | 33.77  |
| p-cluster221694 | TMW67953.1   | hypothetical protein Poli38472_007625 [Pythium oligandrum]                | 52.24  | 42.61  | 16.82  |
| p-cluster221713 | GAX93818.1   | Basophilic leukemia-expressed protein Bles03 [Pythium insidiosum]         | 81.52  | 78.88  | 100.00 |
| p-cluster221967 | TMW65117.1   | hypothetical protein Poli38472_009284 [Pythium oligandrum]                | 33.33  | 78.77  | 29.52  |
| p-cluster222004 | GAY04439.1   | multidrug resistance protein 1-like protein [Pythium insidiosum]          | 97.30  | 35.60  | 46.50  |
| p-cluster222199 | TMW64742.1   | hypothetical protein Poli38472_011622 [Pythium oligandrum]                | 44.23  | 57.99  | 10.35  |
| p-cluster222499 | TMW58005.1   | hypothetical protein Poli38472_013479 [Pythium oligandrum]                | 40.34  | 32.57  | 11.83  |
| p-cluster222543 | GAY03954.1   | transmembrane protein, putative [Pythium insidiosum]                      | 82.93  | 44.66  | 86.97  |
| p-cluster222885 | TMW58361.1   | hypothetical protein Poli38472_009920 [Pythium oligandrum]                | 34.93  | 86.67  | 36.38  |
| p-cluster223246 | OWY94159.1   | hypothetical protein PHMEG_00036190, partial [Phytophthora megakarya]     | 38.55  | 33.71  | 51.60  |
| p-cluster223304 | TMW61862.1   | hypothetical protein Poli38472_010925 [Pythium oligandrum]                | 65.75  | 51.06  | 23.08  |
| p-cluster223550 | RLN92880.1   | hypothetical protein BBJ28_00010072 [Nothophytophthora sp. Chile5]        | 50.54  | 73.39  | 10.13  |
| p-cluster223679 | TMW65782.1   | hypothetical protein Poli38472_008424 [Pythium oligandrum]                | 59.42  | 86.25  | 16.22  |
| p-cluster224260 | UIZ21497.1   | hypothetical protein KXD40_000527 [Peronospora effusa]                    | 50.82  | 79.22  | 4.01   |
| p-cluster224462 | ETL85385.1   | hypothetical protein L917_15071, partial [Phytophthora parasitica]        | 29.60  | 60.43  | 64.83  |
| p-cluster224463 | TMW68261.1   | hypothetical protein Poli38472_005729 [Pythium oligandrum]                | 100.00 | 13.04  | 8.54   |
| p-cluster224536 | TMW57910.1   | hypothetical protein Poli38472_013384 [Pythium oligandrum]                | 41.11  | 84.91  | 20.77  |
| p-cluster224777 | TMW60106.1   | hypothetical protein Poli38472_000148 [Pythium oligandrum]                | 56.94  | 79.76  | 11.73  |
| p-cluster224968 | GAY02183.1   | inositol polyphosphate 5phosphatase putative [Pythium insidiosum]         | 100.00 | 68.16  | 98.56  |
| p-cluster225305 | RLN94751.1   | hypothetical protein BBJ28_00014395 [Nothophytophthora sp. Chile5]        | 37.70  | 60.30  | 28.61  |
| p-cluster225530 | GAY03270.1   | proteasomal ubiquitin receptor ADRM1like protein put [Pythium insidiosum] | 91.94  | 86.71  | 24.60  |
| p-cluster225604 | RLN45516.1   | hypothetical protein BBJ28_00021378 [Nothophytophthora sp. Chile5]        | 32.93  | 30.66  | 32.72  |
| p-cluster226302 | KAG1710562.1 | hypothetical protein DVH05_013288 [Phytophthora capsici]                  | 35.97  | 99.17  | 44.27  |
| p-cluster226627 | GAY04708.1   | TKL protein kinase [Pythium insidiosum]                                   | 36.36  | 45.64  | 17.01  |
| p-cluster226791 | GAY05005.1   | M96 mating-specific protein family [Pythium insidiosum]                   | 98.58  | 15.10  | 64.98  |
| p-cluster226857 | TMW69597.1   | hypothetical protein Poli38472_001753 [Pythium oligandrum]                | 27.11  | 62.85  | 79.12  |
| p-cluster227261 | GAY06546.1   | transmembrane protein, putative, partial [Pythium insidiosum]             | 94.83  | 45.67  | 4.15   |
| p-cluster227359 | TMW55697.1   | hypothetical protein Poli38472_010579 [Pythium oligandrum]                | 36.81  | 94.83  | 24.41  |
| p-cluster227399 | KAE9034024.1 | hypothetical protein PR002_g8356 [Phytophthora rubi]                      | 62.50  | 39.85  | 76.03  |
| p-cluster227533 | TMW56240.1   | hypothetical protein Poli38472_008888 [Pythium oligandrum]                | 37.73  | 93.19  | 20.84  |
| p-cluster228300 | RHY68101.1   | hypothetical protein DYB30_013809, partial [Aphanomyces astaci]           | 36.68  | 88.24  | 72.59  |
| p-cluster228567 | TMW55070.1   | hypothetical protein Poli38472_013832 [Pythium oligandrum]                | 56.00  | 43.10  | 4.62   |
| p-cluster228775 | TMW63506.1   | hypothetical protein Poli38472_002447 [Pythium oligandrum]                | 55.23  | 32.01  | 57.17  |
| p-cluster228823 | TMW68151.1   | hypothetical protein Poli38472_007823 [Pythium oligandrum]                | 55.31  | 93.92  | 34.81  |
| p-cluster228964 | GAX92812.1   | integrator complex subunit, putative [Pythium insidiosum]                 | 85.26  | 97.94  | 9.52   |
| p-cluster229097 | RLN89474.1   | hypothetical protein BBJ28_00021748 [Nothophytophthora sp. Chile5]        | 54.37  | 67.32  | 17.08  |
| p-cluster229306 | TMW65289.1   | hypothetical protein Poli38472_007931 [Pythium oligandrum]                | 26.29  | 85.88  | 28.45  |
| p-cluster229407 | TMW68695.1   | hypothetical protein Poli38472_006163 [Pythium oligandrum]                | 44.86  | 100.00 | 15.67  |
| p-cluster229487 | NQW04709.1   | hypothetical protein [Acidobacteria bacterium]                            | 48.64  | 40.15  | 83.97  |
| p-cluster229548 | RLN10179.1   | hypothetical protein BBJ28_00007240 [Nothophytophthora sp. Chile5]        | 31.48  | 41.37  | 14.74  |
| p-cluster229591 | TMW69413.1   | hypothetical protein Poli38472_001569 [Pythium oligandrum]                | 43.88  | 95.65  | 30.02  |
| p-cluster229630 | RHZ04960.1   | hypothetical protein DYB31_004227, partial [Aphanomyces astaci]           | 36.89  | 44.97  | 81.38  |
| p-cluster229658 | TMW61534.1   | hypothetical protein Poli38472_012725 [Pythium oligandrum]                | 79.66  | 27.31  | 12.94  |
| p-cluster230104 | TMW57635.1   | hypothetical protein Poli38472_003560 [Pythium oligandrum]                | 44.60  | 95.21  | 24.38  |
| p-cluster230163 | GAY02456.1   | AGC protein kinase [Pythium insidiosum]                                   | 98.72  | 22.54  | 5.04   |
| p-cluster230253 | TMW60992.1   | hypothetical protein Poli38472_014453 [Pythium oligandrum]                | 92.50  | 23.26  | 2.89   |
| p-cluster230348 | TMW55752.1   | hypothetical protein Poli38472_010634 [Pythium oligandrum]                | 66.67  | 40.70  | 12.99  |
| p-cluster230463 | POM68463.1   | Hypothetical protein PHPALM_15376 [Phytophthora palmivora var. palmivora] | 40.61  | 50.99  | 65.51  |
| p-cluster230498 | TMW63447.1   | hypothetical protein Poli38472_002388 [Pythium oligandrum]                | 70.45  | 21.67  | 10.95  |
| p-cluster230517 | TMW65279.1   | hypothetical protein Poli38472_007921 [Pythium oligandrum]                | 39.78  | 91.63  | 17.82  |
| p-cluster230530 | KAF1330427.1 | Myosin-like protein, partial [Globisporangium splendens]                  | 82.72  | 28.13  | 3.88   |
| p-cluster230780 | TMW69126.1   | hypothetical protein Poli38472_001282 [Pythium oligandrum]                | 39.90  | 57.41  | 16.31  |
| p-cluster230895 | KAF0734564.1 | hypothetical protein Ae201684_008806 [Aphanomyces euteiches]              | 40.51  | 56.12  | 24.68  |
| p-cluster230938 | RLN72494.1   | hypothetical protein BBJ28_00004551 [Nothophytophthora sp. Chile5]        | 50.45  | 100.00 | 8.94   |
| p-cluster231055 | TMW55711.1   | hypothetical protein Poli38472_010593 [Pythium oligandrum]                | 48.68  | 54.92  | 10.20  |
| p-cluster231159 | GAX98015.1   | pantothenate kinase [Pythium insidiosum]                                  | 100.00 | 43.27  | 30.13  |

|                 |                |                                                                                               |        |        |        |
|-----------------|----------------|-----------------------------------------------------------------------------------------------|--------|--------|--------|
| p-cluster231268 | XP_008910552.1 | hypothetical protein PPTG_23659 [Phytophthora parasitica INRA-310]                            | 87.30  | 82.89  | 92.65  |
| p-cluster231297 | ETP54764.1     | hypothetical protein F442_00610 [Phytophthora parasitica P10297]                              | 37.70  | 55.86  | 20.66  |
| p-cluster231298 | TMW60820.1     | hypothetical protein Poli38472_000862 [Pythium oligandrum]                                    | 75.20  | 47.35  | 21.66  |
| p-cluster231483 | TMW62077.1     | hypothetical protein Poli38472_009570 [Pythium oligandrum]                                    | 52.31  | 82.28  | 10.15  |
| p-cluster231917 | GAY00382.1     | vtpe hatpase putative [Pythium insidiosum]                                                    | 96.97  | 98.51  | 9.01   |
| p-cluster232054 | TMW65391.1     | hypothetical protein Poli38472_008033 [Pythium oligandrum]                                    | 42.95  | 62.07  | 20.16  |
| p-cluster232157 | KAE8893540.1   | hypothetical protein PF003_g22535 [Phytophthora fragariae]                                    | 49.28  | 38.42  | 7.44   |
| p-cluster232161 | GAY02111.1     | elicitor-like transglutaminase [Pythium insidiosum]                                           | 36.94  | 48.40  | 15.09  |
| p-cluster232321 | KAE9351580.1   | hypothetical protein PR003_g4815 [Phytophthora rubi]                                          | 29.05  | 98.50  | 12.89  |
| p-cluster232544 | GAY01427.1     | polycomb-like protein [Pythium insidiosum]                                                    | 96.51  | 100.00 | 10.18  |
| p-cluster232741 | KUF98440.1     | hypothetical protein AM588_10011501 [Phytophthora nicotianae]                                 | 75.56  | 100.00 | 58.44  |
| p-cluster232775 | RHZ04960.1     | hypothetical protein DYB31_004227, partial [Aphanomyces astaci]                               | 42.55  | 77.05  | 37.25  |
| p-cluster232874 | TMW57498.1     | hypothetical protein Poli38472_003423 [Pythium oligandrum]                                    | 55.93  | 62.77  | 21.93  |
| p-cluster232888 | TMW65934.1     | hypothetical protein Poli38472_003699 [Pythium oligandrum]                                    | 35.77  | 99.21  | 13.37  |
| p-cluster232897 | GAY01996.1     | peroxisomal multifunctional enzyme, putative [Pythium insidiosum]                             | 100.00 | 68.81  | 7.34   |
| p-cluster233045 | GAX95191.1     | glycosyltransferase-like domain-containing protein 1-like protein [Pythium insidiosum]        | 94.44  | 100.00 | 3.75   |
| p-cluster233075 | GAX97205.1     | polycomb-like protein [Pythium insidiosum]                                                    | 100.00 | 100.00 | 10.13  |
| p-cluster233076 | TMW67471.1     | hypothetical protein Poli38472_011091 [Pythium oligandrum]                                    | 34.86  | 100.00 | 29.85  |
| p-cluster233211 | KAF1317592.1   | Dead/deah box RNA helicase, partial [Globisporangium splendens]                               | 44.79  | 87.96  | 6.50   |
| p-cluster233316 | KAE9294806.1   | hypothetical protein PF008_g24441 [Phytophthora fragariae]                                    | 37.20  | 21.84  | 39.13  |
| p-cluster233538 | KAF1334511.1   | Cmgc/mapk protein kinase, partial [Globisporangium splendens]                                 | 75.08  | 31.00  | 41.75  |
| p-cluster233784 | GAY00460.1     | serine protease family S33, putative [Pythium insidiosum]                                     | 96.45  | 70.78  | 52.19  |
| p-cluster233915 | GAX99781.1     | 2oxoglutarate and iron-dependent oxygenase domain containing 1, putative [Pythium insidiosum] | 97.42  | 52.66  | 100.00 |
| p-cluster233975 | GAX92883.1     | oxidoreductase [Pythium insidiosum]                                                           | 95.01  | 18.34  | 97.07  |
| p-cluster233985 | GAY02539.1     | radial spoke protein [Pythium insidiosum]                                                     | 97.04  | 32.72  | 98.90  |
| p-cluster234218 | KAF1334268.1   | hypothetical protein FI667_g2339, partial [Globisporangium splendens]                         | 37.42  | 98.98  | 53.52  |
| p-cluster234360 | TMW60015.1     | hypothetical protein Poli38472_000057 [Pythium oligandrum]                                    | 28.53  | 99.03  | 42.30  |
| p-cluster234411 | TMW55163.1     | hypothetical protein Poli38472_013925 [Pythium oligandrum]                                    | 51.55  | 59.51  | 18.59  |
| p-cluster234464 | GAX95191.1     | glycosyltransferase-like domain-containing protein 1-like protein [Pythium insidiosum]        | 37.60  | 94.94  | 41.32  |
| p-cluster234720 | KUF91150.1     | hypothetical protein AM588_10005102 [Phytophthora nicotianae]                                 | 37.66  | 25.96  | 87.43  |
| p-cluster234829 | TMW67146.1     | hypothetical protein Poli38472_012262 [Pythium oligandrum]                                    | 52.24  | 55.56  | 14.89  |
| p-cluster235016 | TMW67327.1     | hypothetical protein Poli38472_012443 [Pythium oligandrum]                                    | 76.92  | 18.76  | 66.89  |
| p-cluster235031 | TMW61447.1     | hypothetical protein Poli38472_012638 [Pythium oligandrum]                                    | 52.08  | 17.02  | 13.33  |
| p-cluster235269 | TMW60632.1     | hypothetical protein Poli38472_000674 [Pythium oligandrum]                                    | 44.39  | 62.29  | 63.41  |
| p-cluster235279 | TMW60366.1     | hypothetical protein Poli38472_000408 [Pythium oligandrum]                                    | 52.54  | 36.73  | 40.00  |
| p-cluster235356 | RLN93308.1     | hypothetical protein BBJ28_00002099 [Nothophytophthora sp. Chile5]                            | 33.22  | 99.44  | 58.48  |
| p-cluster235403 | KAF1322418.1   | hypothetical protein FI667_g11305, partial [Globisporangium splendens]                        | 76.79  | 13.93  | 7.04   |
| p-cluster235406 | TMW64191.1     | hypothetical protein Poli38472_012813 [Pythium oligandrum]                                    | 32.67  | 89.62  | 51.39  |
| p-cluster235462 | ETM42995.1     | hypothetical protein L914_11448 [Phytophthora parasitica]                                     | 38.26  | 98.65  | 30.17  |
| p-cluster235648 | KAF1332558.1   | DNA-binding protein, partial [Globisporangium splendens]                                      | 74.39  | 46.65  | 78.60  |
| p-cluster235676 | TMW57619.1     | hypothetical protein Poli38472_003544 [Pythium oligandrum]                                    | 32.62  | 94.93  | 87.12  |
| p-cluster235696 | XP_002902977.1 | conserved hypothetical protein [Phytophthora infestans T30-4]                                 | 41.18  | 81.12  | 51.83  |
| p-cluster235704 | GAY03502.1     | thymidylate synthase [Pythium insidiosum]                                                     | 86.55  | 33.45  | 100.00 |
| p-cluster235865 | GAX98339.1     | folic acid synthesis protein fol1, putative [Pythium insidiosum]                              | 99.05  | 16.33  | 13.46  |
| p-cluster235945 | TMW63758.1     | hypothetical protein Poli38472_002699 [Pythium oligandrum]                                    | 52.73  | 30.92  | 17.68  |
| p-cluster236024 | TMW61862.1     | hypothetical protein Poli38472_010925 [Pythium oligandrum]                                    | 65.75  | 24.41  | 23.08  |
| p-cluster236256 | GAX93503.1     | sister chromatid cohesion protein DCC1, putative [Pythium insidiosum]                         | 98.33  | 32.91  | 53.89  |
| p-cluster236267 | TMW65535.1     | hypothetical protein Poli38472_008177 [Pythium oligandrum]                                    | 34.85  | 95.61  | 50.35  |
| p-cluster236321 | KUF95642.1     | hypothetical protein AM587_10013825 [Phytophthora nicotianae]                                 | 36.64  | 65.98  | 54.83  |
| p-cluster236542 | GAY06457.1     | hydroxyacyl-coenzyme A dehydrogenase, mitochondrial precursor [Pythium insidiosum]            | 71.29  | 73.55  | 19.20  |
| p-cluster236600 | XP_009523264.1 | hypothetical protein PHYSODRAFT_328648 [Phytophthora sojae]                                   | 49.33  | 55.15  | 7.11   |
| p-cluster236845 | XP_024579170.1 | tubby-like protein [Plasmopara halstedii]CEG42801.1 tubby-like protein [Plasmopara halstedii] | 78.57  | 51.22  | 7.07   |
| p-cluster237003 | TMW65548.1     | hypothetical protein Poli38472_008190 [Pythium oligandrum]                                    | 34.46  | 83.50  | 37.48  |
| p-cluster237114 | TMW59723.1     | hypothetical protein Poli38472_004792 [Pythium oligandrum]                                    | 43.82  | 53.46  | 48.57  |
| p-cluster237638 | OQR86084.1     | hypothetical protein ACHHYP_10996 [Achlya hypogyna]                                           | 54.11  | 90.55  | 17.45  |
| p-cluster237651 | RLO02166.1     | hypothetical protein DYB28_011910, partial [Aphanomyces astaci]                               | 39.82  | 28.53  | 69.14  |
| p-cluster238034 | TMW66362.1     | hypothetical protein Poli38472_004127 [Pythium oligandrum]                                    | 35.59  | 44.33  | 60.94  |
| p-cluster238309 | TMW67416.1     | hypothetical protein Poli38472_011036 [Pythium oligandrum]                                    | 25.92  | 83.83  | 68.02  |
| p-cluster238319 | KAG2888480.1   | hypothetical protein PC115_g20038, partial [Phytophthora cactorum]                            | 72.22  | 27.27  | 19.05  |
| p-cluster238711 | GAY01882.1     | ser/thr kinase putative [Pythium insidiosum]                                                  | 93.75  | 18.64  | 36.25  |
| p-cluster238816 | GAY03794.1     | F-box protein, putative [Pythium insidiosum]                                                  | 97.54  | 17.97  | 32.28  |
| p-cluster238864 | TMW64298.1     | hypothetical protein Poli38472_012920 [Pythium oligandrum]                                    | 75.28  | 34.14  | 74.86  |

|                 |                |                                                                                            |        |        |       |
|-----------------|----------------|--------------------------------------------------------------------------------------------|--------|--------|-------|
| p-cluster239331 | TMW64441.1     | hypothetical protein Poli38472_013063 [Pythium oligandrum]                                 | 62.44  | 65.12  | 32.53 |
| p-cluster239431 | GAX95438.1     | LOW QUALITY PROTEIN: paternally-expressed gene 3 protein-like protein [Pythium insidiosum] | 95.29  | 60.98  | 74.76 |
| p-cluster239806 | TMW55309.1     | hypothetical protein Poli38472_013200 [Pythium oligandrum]                                 | 42.72  | 39.16  | 50.47 |
| p-cluster240148 | TMW66066.1     | hypothetical protein Poli38472_003831 [Pythium oligandrum]                                 | 45.83  | 48.25  | 51.54 |
| p-cluster240373 | TMW58349.1     | hypothetical protein Poli38472_009908 [Pythium oligandrum]                                 | 56.33  | 31.34  | 20.00 |
| p-cluster240592 | GAY03738.1     | AGC protein kinase, partial [Pythium insidiosum]                                           | 90.35  | 100.00 | 44.49 |
| p-cluster240664 | GAY02043.1     | protein CREG1 precursor [Pythium insidiosum]                                               | 92.46  | 54.35  | 92.28 |
| p-cluster240905 | TMW58777.1     | hypothetical protein Poli38472_006922 [Pythium oligandrum]                                 | 57.59  | 100.00 | 15.08 |
| p-cluster241238 | GAX96046.1     | biotin synthase [Pythium insidiosum]                                                       | 99.73  | 46.41  | 20.40 |
| p-cluster241477 | GAX92552.1     | protease inhibitor EpiC4 [Pythium insidiosum]                                              | 33.62  | 94.12  | 47.09 |
| p-cluster241634 | KAG6621911.1   | metalloprotease family [Phytophthora cinnamomi]                                            | 49.38  | 39.54  | 93.17 |
| p-cluster241689 | TMW56094.1     | hypothetical protein Poli38472_008742 [Pythium oligandrum]                                 | 63.89  | 36.76  | 37.22 |
| p-cluster241841 | TMW56336.1     | hypothetical protein Poli38472_006346 [Pythium oligandrum]                                 | 38.94  | 41.36  | 12.25 |
| p-cluster241926 | GAY02998.1     | COP9 signalosome complex subunit, putative [Pythium insidiosum]                            | 98.80  | 45.96  | 27.57 |
| p-cluster241955 | TMW58040.1     | hypothetical protein Poli38472_013514 [Pythium oligandrum]                                 | 30.43  | 100.00 | 18.04 |
| p-cluster241956 | TMW58041.1     | hypothetical protein Poli38472_013515 [Pythium oligandrum]                                 | 60.36  | 33.41  | 97.92 |
| p-cluster242271 | KAF0695726.1   | hypothetical protein As57867_013412 [Aphanomyces stellatus]                                | 28.26  | 98.10  | 14.05 |
| p-cluster242625 | GAY06700.1     | replication protein [Pythium insidiosum]                                                   | 98.21  | 80.71  | 92.49 |
| p-cluster242781 | CAF9914021.1   | hypothetical protein ALECFALPRED_009209 [Alectoria fallacina]                              | 29.19  | 28.12  | 30.26 |
| p-cluster242886 | KAF0730381.1   | hypothetical protein Ae201684_012374 [Aphanomyces euteiches]                               | 40.65  | 93.60  | 76.28 |
| p-cluster242890 | RLN86357.1     | hypothetical protein BBJ28_00004565 [Nothophytophthora sp. Chile5]                         | 31.74  | 36.68  | 32.19 |
| p-cluster242942 | XP_009518349.1 | hypothetical protein PHYSODRAFT_324321 [Phytophthora sojae]                                | 32.42  | 43.51  | 49.81 |
| p-cluster243028 | TMW59513.1     | hypothetical protein Poli38472_004582 [Pythium oligandrum]                                 | 62.57  | 27.76  | 57.30 |
| p-cluster243157 | XP_009845798.1 | hypothetical protein H257_18442 [Aphanomyces astaci]                                       | 29.94  | 37.84  | 83.85 |
| p-cluster243274 | TMW57697.1     | hypothetical protein Poli38472_014300 [Pythium oligandrum]                                 | 44.86  | 53.93  | 4.46  |
| p-cluster243278 | ETO83702.1     | hypothetical protein F444_02319 [Phytophthora parasitica P1976]                            | 64.10  | 14.13  | 15.92 |
| p-cluster243546 | TMW59325.1     | hypothetical protein Poli38472_004394 [Pythium oligandrum]                                 | 48.80  | 90.71  | 17.91 |
| p-cluster243767 | TMW66477.1     | hypothetical protein Poli38472_004242 [Pythium oligandrum]                                 | 43.02  | 88.59  | 14.00 |
| p-cluster243819 | TMW67670.1     | hypothetical protein Poli38472_011290 [Pythium oligandrum]                                 | 53.95  | 47.50  | 15.58 |
| p-cluster243971 | XP_009845798.1 | hypothetical protein H257_18442 [Aphanomyces astaci]                                       | 32.14  | 39.38  | 86.98 |
| p-cluster244264 | TMW56237.1     | hypothetical protein Poli38472_008885 [Pythium oligandrum]                                 | 23.60  | 96.79  | 28.55 |
| p-cluster244370 | TMW68011.1     | hypothetical protein Poli38472_007683 [Pythium oligandrum]                                 | 28.49  | 81.08  | 46.90 |
| p-cluster244418 | TMW64732.1     | hypothetical protein Poli38472_011612 [Pythium oligandrum]                                 | 25.61  | 72.14  | 14.37 |
| p-cluster245001 | TMW66487.1     | hypothetical protein Poli38472_004252 [Pythium oligandrum]                                 | 33.53  | 78.28  | 33.54 |
| p-cluster245026 | KAF1327813.1   | Ubiquinol cytochrome c reductase subunit qcr9, partial [Globisporangium splendens]         | 60.53  | 34.23  | 74.49 |
| p-cluster245102 | XP_002895278.1 | putative E3 ubiquitin-protein ligase MARCH6 [Phytophthora infestans T30-4]                 | 62.39  | 48.44  | 8.47  |
| p-cluster245147 | TMW66487.1     | hypothetical protein Poli38472_004252 [Pythium oligandrum]                                 | 45.02  | 90.52  | 21.47 |
| p-cluster245167 | TMW66819.1     | hypothetical protein Poli38472_011935 [Pythium oligandrum]                                 | 46.67  | 71.33  | 5.28  |
| p-cluster245357 | RLN70580.1     | hypothetical protein BBJ28_00017399 [Nothophytophthora sp. Chile5]                         | 35.92  | 54.44  | 30.73 |
| p-cluster245535 | TMW69170.1     | hypothetical protein Poli38472_001326 [Pythium oligandrum]                                 | 42.86  | 70.61  | 17.03 |
| p-cluster245610 | RLN72535.1     | hypothetical protein BBJ28_00017053 [Nothophytophthora sp. Chile5]                         | 33.48  | 87.45  | 52.71 |
| p-cluster245695 | KAE8901877.1   | hypothetical protein PF003_g13847 [Phytophthora fragariae]                                 | 42.11  | 59.72  | 68.91 |
| p-cluster245781 | TMW69170.1     | hypothetical protein Poli38472_001326 [Pythium oligandrum]                                 | 60.89  | 96.22  | 14.26 |
| p-cluster245832 | TMW69518.1     | hypothetical protein Poli38472_001674 [Pythium oligandrum]                                 | 40.59  | 85.09  | 28.83 |
| p-cluster246066 | TMW66169.1     | hypothetical protein Poli38472_003934 [Pythium oligandrum]                                 | 35.04  | 66.86  | 6.45  |
| p-cluster246172 | TMW55894.1     | hypothetical protein Poli38472_008542 [Pythium oligandrum]                                 | 52.33  | 100.00 | 5.27  |
| p-cluster246478 | GAX94240.1     | ser/thr kinase [Pythium insidiosum]                                                        | 98.91  | 100.00 | 8.14  |
| p-cluster246548 | TMW59163.1     | hypothetical protein Poli38472_007308 [Pythium oligandrum]                                 | 58.59  | 36.03  | 99.41 |
| p-cluster246673 | TMW64264.1     | hypothetical protein Poli38472_012886 [Pythium oligandrum]                                 | 63.89  | 33.03  | 11.73 |
| p-cluster246768 | TMW67809.1     | hypothetical protein Poli38472_007481 [Pythium oligandrum]                                 | 64.63  | 20.97  | 11.31 |
| p-cluster246899 | KAE9338728.1   | hypothetical protein PF008_g11932 [Phytophthora fragariae]                                 | 27.73  | 86.71  | 71.91 |
| p-cluster246924 | TMW63743.1     | hypothetical protein Poli38472_002684 [Pythium oligandrum]                                 | 45.74  | 85.86  | 19.90 |
| p-cluster247018 | GAX93117.1     | 40S ribosomal protein S15 [Pythium insidiosum]                                             | 100.00 | 29.40  | 75.97 |
| p-cluster247097 | RLN70580.1     | hypothetical protein BBJ28_00017399 [Nothophytophthora sp. Chile5]                         | 34.42  | 13.12  | 33.57 |
| p-cluster247166 | GAY03096.1     | glutamate-tRNA ligase [Pythium insidiosum]                                                 | 98.97  | 40.59  | 10.84 |
| p-cluster247250 | TMW60682.1     | hypothetical protein Poli38472_000724 [Pythium oligandrum]                                 | 42.38  | 44.93  | 77.92 |
| p-cluster247308 | TMW63204.1     | hypothetical protein Poli38472_002145 [Pythium oligandrum]                                 | 57.75  | 46.90  | 10.00 |
| p-cluster247323 | TMW59125.1     | hypothetical protein Poli38472_007270 [Pythium oligandrum]                                 | 40.85  | 34.10  | 71.53 |
| p-cluster247535 | XP_009536759.1 | hypothetical protein PHYSODRAFT_306431 [Phytophthora sojae]                                | 40.64  | 28.93  | 32.85 |
| p-cluster247949 | GAX96550.1     | protein kinase putative [Pythium insidiosum]                                               | 81.98  | 41.61  | 83.66 |
| p-cluster248202 | TMW65756.1     | hypothetical protein Poli38472_008398 [Pythium oligandrum]                                 | 36.75  | 92.51  | 50.39 |
| p-cluster248460 | KAF1329430.1   | hypothetical protein F1667_g6071, partial [Globisporangium splendens]                      | 52.11  | 23.39  | 37.77 |

|                 |                |                                                                                    |        |        |        |
|-----------------|----------------|------------------------------------------------------------------------------------|--------|--------|--------|
| p-cluster248690 | KAG3102054.1   | hypothetical protein PI125_g14292 [Phytophthora idaei]                             | 47.79  | 50.19  | 31.12  |
| p-cluster248844 | TMW68722.1     | hypothetical protein Poli38472_006190 [Pythium oligandrum]                         | 39.24  | 89.71  | 24.51  |
| p-cluster249043 | GAY05523.1     | DNA polymerase epsilon subunit, putative [Pythium insidiosum]                      | 72.44  | 36.15  | 28.72  |
| p-cluster249109 | TMW64771.1     | hypothetical protein Poli38472_011651 [Pythium oligandrum]                         | 57.16  | 43.30  | 99.66  |
| p-cluster249178 | TMW59500.1     | hypothetical protein Poli38472_004569 [Pythium oligandrum]                         | 70.43  | 43.89  | 11.83  |
| p-cluster249283 | RHY82303.1     | hypothetical protein DYB35_000732 [Aphanomyces astaci]                             | 59.14  | 80.17  | 22.48  |
| p-cluster249388 | KAG7376596.1   | hypothetical protein PHYBOEH_001465 [Phytophthora boehmeriae]                      | 44.74  | 41.01  | 88.89  |
| p-cluster249495 | TMW61996.1     | hypothetical protein Poli38472_009489 [Pythium oligandrum]                         | 37.42  | 59.27  | 60.26  |
| p-cluster249535 | KAE9004323.1   | hypothetical protein PR001_g17746 [Phytophthora rubi]                              | 36.89  | 63.58  | 90.35  |
| p-cluster249649 | TMW65212.1     | hypothetical protein Poli38472_009379 [Pythium oligandrum]                         | 50.63  | 19.60  | 18.99  |
| p-cluster249673 | GAX98090.1     | isocitrate dehydrogenase, NADP-dependent [Pythium insidiosum]                      | 91.75  | 81.36  | 10.02  |
| p-cluster249811 | TMW61315.1     | hypothetical protein Poli38472_012506 [Pythium oligandrum]                         | 54.29  | 38.41  | 70.06  |
| p-cluster249863 | KAF1321099.1   | hypothetical protein FI667_g12071, partial [Globisporangium splendens]             | 31.05  | 29.79  | 9.24   |
| p-cluster249944 | TMW60552.1     | hypothetical protein Poli38472_000594 [Pythium oligandrum]                         | 41.31  | 73.16  | 54.12  |
| p-cluster250015 | TMW65955.1     | hypothetical protein Poli38472_003720 [Pythium oligandrum]                         | 69.95  | 79.20  | 19.39  |
| p-cluster250206 | GAY03411.1     | 26S proteasome non-ATPase regulatory subunit 6 [Pythium insidiosum]                | 100.00 | 40.64  | 14.06  |
| p-cluster250411 | KUF87766.1     | hypothetical protein AM587_10001355 [Phytophthora nicotianae]                      | 48.89  | 37.50  | 23.20  |
| p-cluster250412 | GAX94263.1     | TKL protein kinase [Pythium insidiosum]                                            | 73.33  | 100.00 | 6.28   |
| p-cluster250572 | GAY03327.1     | enoyl-CoA hydratase/isomerase family, putative [Pythium insidiosum]                | 75.91  | 100.00 | 100.00 |
| p-cluster250652 | TMW61927.1     | hypothetical protein Poli38472_010990 [Pythium oligandrum]                         | 70.73  | 87.23  | 11.58  |
| p-cluster250757 | XP_002894984.1 | conserved hypothetical protein [Phytophthora infestans T30-4]                      | 41.35  | 83.61  | 12.76  |
| p-cluster250863 | RLN88384.1     | hypothetical protein BBJ28_00006152 [Nothophytophthora sp. Chile5]                 | 35.08  | 53.20  | 39.40  |
| p-cluster250930 | XP_009845798.1 | hypothetical protein H257_18442 [Aphanomyces astaci]                               | 33.33  | 67.54  | 72.92  |
| p-cluster251050 | TMW62162.1     | hypothetical protein Poli38472_009655 [Pythium oligandrum]                         | 35.80  | 69.12  | 22.62  |
| p-cluster251153 | GAX99784.1     | aspartyl protease family A01B, putative [Pythium insidiosum]                       | 75.35  | 84.27  | 36.54  |
| p-cluster251247 | TMW55845.1     | hypothetical protein Poli38472_008493 [Pythium oligandrum]                         | 70.27  | 31.36  | 7.25   |
| p-cluster251462 | TMW69426.1     | hypothetical protein Poli38472_001582 [Pythium oligandrum]                         | 28.33  | 74.01  | 46.73  |
| p-cluster251467 | TMW67612.1     | hypothetical protein Poli38472_011232 [Pythium oligandrum]                         | 45.36  | 22.51  | 26.44  |
| p-cluster251506 | TMW69785.1     | hypothetical protein Poli38472_001941 [Pythium oligandrum]                         | 35.71  | 41.20  | 54.81  |
| p-cluster251626 | TMW62304.1     | hypothetical protein Poli38472_009797 [Pythium oligandrum]                         | 43.63  | 52.80  | 18.62  |
| p-cluster251687 | GAX96604.1     | E3 ubiquitin ligase, putative [Pythium insidiosum]                                 | 78.46  | 51.85  | 30.02  |
| p-cluster251734 | TMW63714.1     | hypothetical protein Poli38472_002655 [Pythium oligandrum]                         | 28.84  | 84.71  | 16.83  |
| p-cluster251869 | OQS01806.1     | hypothetical protein THRCLA_21607, partial [Thraustotheca clavata]                 | 28.33  | 70.98  | 58.85  |
| p-cluster251876 | KAF1333590.1   | hypothetical protein FI667_g2426, partial [Globisporangium splendens]              | 47.75  | 73.76  | 20.04  |
| p-cluster252120 | TMW59917.1     | hypothetical protein Poli38472_004986 [Pythium oligandrum]                         | 42.47  | 94.70  | 28.86  |
| p-cluster252265 | GAX96429.1     | exosome complex exonuclease RRP41-like protein [Pythium insidiosum]                | 96.26  | 27.72  | 75.71  |
| p-cluster252310 | TMW57773.1     | hypothetical protein Poli38472_014376 [Pythium oligandrum]                         | 34.66  | 92.39  | 98.98  |
| p-cluster252457 | TMW66027.1     | hypothetical protein Poli38472_003792 [Pythium oligandrum]                         | 37.53  | 36.42  | 48.93  |
| p-cluster252491 | TMW66324.1     | hypothetical protein Poli38472_004089 [Pythium oligandrum]                         | 34.36  | 76.35  | 36.27  |
| p-cluster252499 | TMW60206.1     | hypothetical protein Poli38472_000248 [Pythium oligandrum]                         | 34.93  | 85.53  | 50.78  |
| p-cluster252722 | KAG6976941.1   | hypothetical protein JG688_00000854 [Phytophthora aleatoria]                       | 54.17  | 62.34  | 36.92  |
| p-cluster253101 | TMW64629.1     | hypothetical protein Poli38472_011509 [Pythium oligandrum]                         | 37.43  | 69.57  | 19.70  |
| p-cluster253461 | GAX92941.1     | homoserine dehydrogenase [Pythium insidiosum]                                      | 96.26  | 100.00 | 29.56  |
| p-cluster253496 | TMW60573.1     | hypothetical protein Poli38472_000615 [Pythium oligandrum]                         | 54.05  | 84.34  | 32.37  |
| p-cluster253504 | KAH9121358.1   | hypothetical protein LEN26_010709 [Aphanomyces euteiches]                          | 35.90  | 52.70  | 37.68  |
| p-cluster253601 | GAX92391.1     | myb-like DNA-binding protein, putative [Pythium insidiosum]                        | 100.00 | 100.00 | 34.55  |
| p-cluster253602 | TMW64595.1     | hypothetical protein Poli38472_011475 [Pythium oligandrum]                         | 61.04  | 38.60  | 14.38  |
| p-cluster253626 | TMW55374.1     | hypothetical protein Poli38472_013265 [Pythium oligandrum]                         | 30.63  | 61.56  | 38.83  |
| p-cluster253765 | GAX92274.1     | transmembrane protein, putative [Pythium insidiosum]                               | 94.55  | 39.43  | 4.65   |
| p-cluster253881 | GAX96405.1     | von Willebrand factor A [Pythium insidiosum]                                       | 91.33  | 25.17  | 49.34  |
| p-cluster253989 | TYZ58913.1     | hypothetical protein PybrP1_009517, partial [[Pythium] brassicae (nom. inval.)]    | 55.75  | 54.59  | 11.19  |
| p-cluster254031 | KAG6611026.1   | putative COPII coat assembly protein SEC16 [Phytophthora cinnamomi]                | 57.64  | 22.22  | 14.82  |
| p-cluster254125 | TMW68002.1     | hypothetical protein Poli38472_007674 [Pythium oligandrum]                         | 37.27  | 35.26  | 12.11  |
| p-cluster254183 | TMW60247.1     | hypothetical protein Poli38472_000289 [Pythium oligandrum]                         | 50.34  | 46.69  | 10.26  |
| p-cluster254316 | TYZ63996.1     | hypothetical protein PybrP1_004231 [[Pythium] brassicae (nom. inval.)]             | 45.15  | 80.24  | 19.34  |
| p-cluster254377 | TMW69150.1     | hypothetical protein Poli38472_001306 [Pythium oligandrum]                         | 70.00  | 34.48  | 24.10  |
| p-cluster254421 | CCI48086.1     | unnamed protein product [Albugo candida]                                           | 29.48  | 100.00 | 33.00  |
| p-cluster254465 | XP_048542626.1 | histone H3.2-like [Triticum urartu]                                                | 54.69  | 39.02  | 34.68  |
| p-cluster254682 | TMW64191.1     | hypothetical protein Poli38472_012813 [Pythium oligandrum]                         | 38.33  | 47.20  | 15.89  |
| p-cluster254880 | KAG6948734.1   | hypothetical protein JG687_00015285 [Phytophthora cactorum]                        | 35.05  | 50.00  | 29.60  |
| p-cluster254919 | TMW59536.1     | hypothetical protein Poli38472_004605 [Pythium oligandrum]                         | 47.09  | 34.44  | 17.56  |
| p-cluster254991 | POM70964.1     | Hypothetical protein PHPALM_12537, partial [Phytophthora palmivora var. palmivora] | 49.75  | 36.82  | 75.00  |

|                 |              |                                                                                            |        |        |        |
|-----------------|--------------|--------------------------------------------------------------------------------------------|--------|--------|--------|
| p-cluster255047 | KAF1319629.1 | hypothetical protein FI667_g13088, partial [Globisporangium splendens]                     | 66.00  | 48.54  | 5.06   |
| p-cluster255172 | TMW55680.1   | hypothetical protein Poli38472_010562 [Pythium oligandrum]                                 | 52.33  | 75.68  | 12.56  |
| p-cluster255428 | TMW69716.1   | hypothetical protein Poli38472_001872 [Pythium oligandrum]                                 | 48.99  | 83.33  | 91.35  |
| p-cluster255434 | TMW66196.1   | hypothetical protein Poli38472_003961 [Pythium oligandrum]                                 | 33.49  | 54.99  | 59.13  |
| p-cluster255469 | TMW55025.1   | hypothetical protein Poli38472_013787 [Pythium oligandrum]                                 | 49.42  | 83.09  | 34.06  |
| p-cluster255580 | TMW56648.1   | hypothetical protein Poli38472_006658 [Pythium oligandrum]                                 | 33.66  | 77.39  | 20.76  |
| p-cluster255638 | TMW68706.1   | hypothetical protein Poli38472_006174 [Pythium oligandrum]                                 | 39.56  | 100.00 | 100.00 |
| p-cluster255720 | TMW60229.1   | hypothetical protein Poli38472_000271 [Pythium oligandrum]                                 | 26.34  | 95.75  | 13.68  |
| p-cluster255945 | RLN48993.1   | hypothetical protein BBJ28_00012922, partial [Nothophytophthora sp. Chile5]                | 29.95  | 32.76  | 19.02  |
| p-cluster255992 | GAY04303.1   | Intraflagellar Transport Protein 57 [Pythium insidiosum]                                   | 55.97  | 51.61  | 14.42  |
| p-cluster256054 | TMW64371.1   | hypothetical protein Poli38472_012993 [Pythium oligandrum]                                 | 51.28  | 45.69  | 83.69  |
| p-cluster256229 | TMW63249.1   | hypothetical protein Poli38472_002190 [Pythium oligandrum]                                 | 33.03  | 83.01  | 32.81  |
| p-cluster256443 | CC111391.1   | unnamed protein product [Albugo candida]                                                   | 35.46  | 96.58  | 34.53  |
| p-cluster256656 | TMW61549.1   | hypothetical protein Poli38472_012740 [Pythium oligandrum]                                 | 59.14  | 49.06  | 23.61  |
| p-cluster256792 | TMW57259.1   | hypothetical protein Poli38472_003184 [Pythium oligandrum]                                 | 40.82  | 21.63  | 16.25  |
| p-cluster256797 | TMW62425.1   | hypothetical protein Poli38472_005043 [Pythium oligandrum]                                 | 36.45  | 94.42  | 11.05  |
| p-cluster256823 | KAG9407416.1 | hypothetical protein AC1031_002143 [Aphanomyces cochlioides]                               | 38.18  | 78.57  | 35.97  |
| p-cluster256848 | GAY06760.1   | G-protein coupled receptor [Pythium insidiosum]                                            | 95.00  | 50.42  | 11.27  |
| p-cluster257079 | GAY03501.1   | R2R3 Myb protein [Pythium insidiosum]                                                      | 98.59  | 31.28  | 13.15  |
| p-cluster257084 | GAX95438.1   | LOW QUALITY PROTEIN: paternally-expressed gene 3 protein-like protein [Pythium insidiosum] | 85.11  | 100.00 | 31.25  |
| p-cluster257215 | TMW59532.1   | hypothetical protein Poli38472_004601 [Pythium oligandrum]                                 | 43.15  | 67.47  | 8.75   |
| p-cluster257227 | ETM47369.1   | hypothetical protein L914_07907 [Phytophthora parasitica]                                  | 37.93  | 34.80  | 56.19  |
| p-cluster257259 | TMW63930.1   | hypothetical protein Poli38472_014635 [Pythium oligandrum]                                 | 43.33  | 48.07  | 10.76  |
| p-cluster257403 | KAG1711761.1 | hypothetical protein DVH05_009004 [Phytophthora capsici]                                   | 39.58  | 55.45  | 8.18   |
| p-cluster257406 | TMW68200.1   | hypothetical protein Poli38472_007872 [Pythium oligandrum]                                 | 24.40  | 98.03  | 14.35  |
| p-cluster257721 | GAY02090.1   | kinesin-like protein [Pythium insidiosum]                                                  | 96.84  | 78.39  | 38.35  |
| p-cluster257771 | TMW62787.1   | hypothetical protein Poli38472_005405 [Pythium oligandrum]                                 | 28.91  | 97.01  | 9.29   |
| p-cluster257784 | TMW61427.1   | hypothetical protein Poli38472_012618 [Pythium oligandrum]                                 | 26.10  | 93.22  | 36.90  |
| p-cluster257801 | TMW63629.1   | hypothetical protein Poli38472_002570 [Pythium oligandrum]                                 | 33.17  | 52.24  | 36.38  |
| p-cluster257815 | TMW57116.1   | hypothetical protein Poli38472_003041 [Pythium oligandrum]                                 | 40.35  | 94.41  | 13.37  |
| p-cluster258090 | TMW60638.1   | hypothetical protein Poli38472_000680 [Pythium oligandrum]                                 | 35.46  | 98.60  | 4.98   |
| p-cluster258099 | TMW61619.1   | hypothetical protein Poli38472_010682 [Pythium oligandrum]                                 | 43.45  | 86.31  | 36.53  |
| p-cluster258135 | GAX93878.1   | mediator of RNA polymerase II transcription subunit, putative [Pythium insidiosum]         | 47.50  | 100.00 | 51.40  |
| p-cluster258514 | TMW68411.1   | hypothetical protein Poli38472_005879 [Pythium oligandrum]                                 | 62.50  | 50.26  | 6.18   |
| p-cluster258558 | RLN45971.1   | hypothetical protein BBJ28_00019495 [Nothophytophthora sp. Chile5]                         | 31.34  | 78.82  | 17.44  |
| p-cluster258605 | POM72079.1   | DEAD/DEAH box RNA helicase [Phytophthora palmivora var. palmivora]                         | 35.12  | 93.75  | 58.40  |
| p-cluster258643 | TMW62165.1   | hypothetical protein Poli38472_009658 [Pythium oligandrum]                                 | 42.86  | 54.27  | 4.16   |
| p-cluster258920 | KAE9311446.1 | hypothetical protein PR003_g20012 [Phytophthora rubi]                                      | 46.58  | 23.64  | 6.38   |
| p-cluster258991 | TMW61747.1   | hypothetical protein Poli38472_010810 [Pythium oligandrum]                                 | 34.23  | 55.68  | 20.79  |
| p-cluster259081 | TMW60385.1   | hypothetical protein Poli38472_000427 [Pythium oligandrum]                                 | 50.00  | 43.37  | 17.05  |
| p-cluster259469 | KAF1790631.1 | Homeodomain-like [Phytophthora cactorum]                                                   | 37.85  | 79.80  | 30.11  |
| p-cluster259530 | TMW68861.1   | hypothetical protein Poli38472_001017 [Pythium oligandrum]                                 | 65.57  | 44.20  | 15.21  |
| p-cluster259641 | TMW66234.1   | hypothetical protein Poli38472_003999 [Pythium oligandrum]                                 | 56.00  | 21.28  | 2.90   |
| p-cluster259790 | TMW56890.1   | hypothetical protein Poli38472_002815 [Pythium oligandrum]                                 | 63.64  | 50.30  | 30.66  |
| p-cluster259912 | KAF1321913.1 | Type i inositol-3,4-bisphosphate 4-phosphatase, partial [Globisporangium splendens]        | 41.14  | 71.96  | 8.12   |
| p-cluster260004 | TMW68415.1   | hypothetical protein Poli38472_005883 [Pythium oligandrum]                                 | 40.00  | 100.00 | 10.07  |
| p-cluster260117 | GAY02622.1   | DNA topoisomerase VI subunit A [Pythium insidiosum]                                        | 96.88  | 96.97  | 62.34  |
| p-cluster260372 | GAY00029.1   | protein SUPPRESSOR OF FRI 4-like isoform X3 [Pythium insidiosum]                           | 75.45  | 100.00 | 26.20  |
| p-cluster260503 | KAF1322448.1 | hypothetical protein FI667_g11173, partial [Globisporangium splendens]                     | 54.64  | 65.00  | 6.21   |
| p-cluster260779 | TMW68757.1   | hypothetical protein Poli38472_006225 [Pythium oligandrum]                                 | 42.86  | 88.35  | 41.36  |
| p-cluster260880 | TMW69361.1   | hypothetical protein Poli38472_001517 [Pythium oligandrum]                                 | 57.69  | 52.53  | 6.90   |
| p-cluster261032 | TMW66325.1   | hypothetical protein Poli38472_004090 [Pythium oligandrum]                                 | 89.74  | 35.14  | 2.98   |
| p-cluster261048 | GAX95438.1   | LOW QUALITY PROTEIN: paternally-expressed gene 3 protein-like protein [Pythium insidiosum] | 95.83  | 100.00 | 11.69  |
| p-cluster261182 | TMW64839.1   | hypothetical protein Poli38472_009006 [Pythium oligandrum]                                 | 40.63  | 98.39  | 28.44  |
| p-cluster261200 | GAX97356.1   | dynamain [Pythium insidiosum]                                                              | 95.28  | 100.00 | 14.32  |
| p-cluster261266 | GAY02450.1   | AGC protein kinase [Pythium insidiosum]                                                    | 99.24  | 100.00 | 13.52  |
| p-cluster261333 | GAX93395.1   | DNA polymerase subunit alpha B, putative, partial [Pythium insidiosum]                     | 98.21  | 82.35  | 5.15   |
| p-cluster261432 | KAG3145052.1 | hypothetical protein PC128_g24283 [Phytophthora cactorum]                                  | 40.28  | 80.68  | 69.23  |
| p-cluster261437 | GAY04853.1   | 26S proteasome regulatory subunit N1 [Pythium insidiosum]                                  | 100.00 | 100.00 | 3.17   |
| p-cluster261439 | TMW64383.1   | hypothetical protein Poli38472_013005 [Pythium oligandrum]                                 | 36.67  | 77.59  | 3.93   |
| p-cluster261495 | TMW57812.1   | hypothetical protein Poli38472_014415 [Pythium oligandrum]                                 | 46.91  | 86.96  | 21.79  |
| p-cluster261661 | TMW63422.1   | hypothetical protein Poli38472_002363 [Pythium oligandrum]                                 | 50.00  | 57.14  | 15.75  |

|                 |                |                                                                                             |       |        |        |
|-----------------|----------------|---------------------------------------------------------------------------------------------|-------|--------|--------|
| p-cluster261968 | TMW68627.1     | hypothetical protein Poli38472_006095 [Pythium oligandrum]                                  | 94.44 | 31.21  | 34.84  |
| p-cluster262074 | TMW63047.1     | hypothetical protein Poli38472_005665 [Pythium oligandrum]                                  | 41.64 | 98.33  | 6.38   |
| p-cluster262638 | TMW55396.1     | hypothetical protein Poli38472_013287 [Pythium oligandrum]                                  | 66.01 | 43.48  | 64.50  |
| p-cluster262716 | KAG3120136.1   | hypothetical protein PI125_g1390 [Phytophthora idaei]                                       | 25.07 | 47.00  | 39.93  |
| p-cluster262986 | TMW68462.1     | hypothetical protein Poli38472_005930 [Pythium oligandrum]                                  | 58.33 | 40.65  | 97.76  |
| p-cluster263223 | TMW62656.1     | hypothetical protein Poli38472_005274 [Pythium oligandrum]                                  | 88.89 | 25.86  | 40.91  |
| p-cluster263259 | TMW64635.1     | hypothetical protein Poli38472_011515 [Pythium oligandrum]                                  | 40.72 | 100.00 | 46.78  |
| p-cluster263496 | TMW60634.1     | hypothetical protein Poli38472_000676 [Pythium oligandrum]                                  | 46.63 | 38.78  | 28.28  |
| p-cluster263549 | TMW58491.1     | hypothetical protein Poli38472_010050 [Pythium oligandrum]                                  | 42.55 | 82.14  | 22.54  |
| p-cluster263687 | GAY00122.1     | kinesin-like protein [Pythium insidiosum]                                                   | 92.14 | 67.95  | 56.83  |
| p-cluster263688 | TMW56133.1     | hypothetical protein Poli38472_008781 [Pythium oligandrum]                                  | 41.67 | 87.74  | 54.27  |
| p-cluster263707 | TMW58075.1     | hypothetical protein Poli38472_013549 [Pythium oligandrum]                                  | 44.22 | 45.93  | 95.51  |
| p-cluster264233 | GAY05620.1     | glycoprotein elicitor-like protein [Pythium insidiosum]                                     | 96.50 | 16.30  | 53.68  |
| p-cluster264559 | XP_002902461.1 | conserved hypothetical protein [Phytophthora infestans T30-4]                               | 41.86 | 37.28  | 75.44  |
| p-cluster264599 | KAF1328557.1   | P-type atpase, partial [Globisporangium splendens]                                          | 41.86 | 66.40  | 7.64   |
| p-cluster264758 | TMW68362.1     | hypothetical protein Poli38472_005830 [Pythium oligandrum]                                  | 68.18 | 48.09  | 24.86  |
| p-cluster265052 | GAY04316.1     | elongator complex protein putative [Pythium insidiosum]                                     | 46.72 | 65.90  | 24.13  |
| p-cluster265120 | TMW56983.1     | hypothetical protein Poli38472_002908 [Pythium oligandrum]                                  | 32.80 | 99.47  | 31.36  |
| p-cluster265564 | TMW59714.1     | hypothetical protein Poli38472_004783 [Pythium oligandrum]                                  | 42.25 | 62.15  | 68.75  |
| p-cluster265663 | TMW62636.1     | hypothetical protein Poli38472_005254 [Pythium oligandrum]                                  | 42.16 | 47.44  | 67.57  |
| p-cluster265723 | XP_008904825.1 | hypothetical protein PPTG_11290 [Phytophthora parasitica INRA-310]                          | 38.79 | 55.75  | 31.48  |
| p-cluster265786 | TMW64834.1     | hypothetical protein Poli38472_009001 [Pythium oligandrum]                                  | 43.02 | 70.49  | 34.62  |
| p-cluster265917 | KAF1334147.1   | Cyclic nucleotide-binding protein, partial [Globisporangium splendens]                      | 42.79 | 64.49  | 43.89  |
| p-cluster266153 | RLN52674.1     | hypothetical protein BBJ28_00022208 [Nothophytophthora sp. Chile5]                          | 33.09 | 97.22  | 39.05  |
| p-cluster266236 | TMW55985.1     | hypothetical protein Poli38472_008633 [Pythium oligandrum]                                  | 91.18 | 15.81  | 5.19   |
| p-cluster267040 | POM71630.1     | Hypothetical protein PHPALM_11777 [Phytophthora palmivora var. palmivora]                   | 55.56 | 22.50  | 25.81  |
| p-cluster267049 | ETP29174.1     | hypothetical protein F442_21640, partial [Phytophthora parasitica P10297]                   | 52.73 | 21.79  | 78.47  |
| p-cluster267239 | XP_024575210.1 | UNCHARACTERIZED [Plasmopara halstedii]CEG38841.1 UNCHARACTERIZED [Plasmopara halstedii]     | 60.61 | 50.77  | 98.70  |
| p-cluster267242 | XP_024585799.1 | uncharacterized protein PHALS_07194 [Plasmopara halstedii]                                  | 50.00 | 51.25  | 55.41  |
| p-cluster267555 | KAG6610863.1   | Tudor-like, plant [Phytophthora cinnamomi]                                                  | 58.14 | 39.41  | 7.18   |
| p-cluster267616 | GAX97578.1     | GCN5-related N-acetyltransferase [Pythium insidiosum]                                       | 93.02 | 42.05  | 51.67  |
| p-cluster267623 | TMW62813.1     | hypothetical protein Poli38472_005431 [Pythium oligandrum]                                  | 88.00 | 32.26  | 97.09  |
| p-cluster267696 | KAG6574742.1   | hypothetical protein IUM83_10959 [Phytophthora cinnamomi]                                   | 41.94 | 89.80  | 34.33  |
| p-cluster267822 | GAY00460.1     | serine protease family S33, putative [Pythium insidiosum]                                   | 74.64 | 29.44  | 80.81  |
| p-cluster267846 | GAX93078.1     | sodium/hydrogen exchanger 3 [Pythium insidiosum]                                            | 97.46 | 97.52  | 19.31  |
| p-cluster268319 | ETI32435.1     | hypothetical protein F443_20769 [Phytophthora parasitica P1569]                             | 28.57 | 72.36  | 19.19  |
| p-cluster268496 | OQS01441.1     | Chloride Channel (CIC) Family [Achlya hypogyna]                                             | 42.92 | 42.51  | 77.34  |
| p-cluster268782 | KAF1326940.1   | Pantothenate synthetase, partial [Globisporangium splendens]                                | 39.53 | 36.92  | 18.77  |
| p-cluster268880 | TMW62845.1     | hypothetical protein Poli38472_005463 [Pythium oligandrum]                                  | 38.76 | 59.72  | 34.51  |
| p-cluster268906 | TMW58355.1     | hypothetical protein Poli38472_009914 [Pythium oligandrum]                                  | 74.60 | 9.40   | 9.75   |
| p-cluster268925 | GAY02632.1     | negative elongation factor, putative [Pythium insidiosum]                                   | 79.10 | 87.46  | 26.56  |
| p-cluster268941 | GAX95259.1     | CMGC/CDKL protein kinase [Pythium insidiosum]                                               | 96.78 | 100.00 | 48.67  |
| p-cluster268947 | TMW57108.1     | hypothetical protein Poli38472_003033 [Pythium oligandrum]                                  | 52.21 | 98.43  | 46.45  |
| p-cluster269371 | GAX98032.1     | UDP-glucosyl transferase family protein [Pythium insidiosum]                                | 98.08 | 22.22  | 9.90   |
| p-cluster269397 | TMW59437.1     | hypothetical protein Poli38472_004506 [Pythium oligandrum]                                  | 31.86 | 27.23  | 17.01  |
| p-cluster269779 | KAF1334095.1   | putative seven transmembrane receptor-rhodopsin family, partial [Globisporangium splendens] | 66.04 | 94.64  | 15.87  |
| p-cluster269814 | TMW57720.1     | hypothetical protein Poli38472_014323 [Pythium oligandrum]                                  | 33.49 | 75.95  | 32.49  |
| p-cluster270105 | GAY01449.1     | splicing factor 3 subunit putative [Pythium insidiosum]                                     | 97.22 | 57.14  | 4.00   |
| p-cluster270526 | CCA22524.1     | putative polyprotein [Albugo laibachii Nc14]                                                | 44.76 | 54.74  | 60.00  |
| p-cluster270545 | GAY05172.1     | cystathionine beta-synthase [Pythium insidiosum]                                            | 75.00 | 37.63  | 13.22  |
| p-cluster270561 | GAX93635.1     | histone H1, putative [Pythium insidiosum]                                                   | 99.42 | 47.53  | 100.00 |
| p-cluster270701 | KAE9284610.1   | hypothetical protein PF008_g27118 [Phytophthora fragariae]                                  | 28.77 | 88.30  | 41.06  |
| p-cluster270747 | GAY05747.1     | replication protein [Pythium insidiosum]                                                    | 33.11 | 19.34  | 49.36  |
| p-cluster270971 | KAG3172102.1   | hypothetical protein PI126_g1577 [Phytophthora idaei]                                       | 35.96 | 66.20  | 35.43  |
| p-cluster271079 | XP_002905231.1 | conserved hypothetical protein [Phytophthora infestans T30-4]                               | 53.97 | 82.89  | 14.35  |
| p-cluster271414 | XP_008911979.1 | hypothetical protein PPTG_15517 [Phytophthora parasitica INRA-310]                          | 53.49 | 14.95  | 46.37  |
| p-cluster271444 | KAF1326725.1   | Atp-dependent helicase, partial [Globisporangium splendens]                                 | 30.35 | 85.32  | 20.75  |
| p-cluster271477 | GAY00603.1     | serine protease family S33, putative [Pythium insidiosum]                                   | 50.62 | 49.38  | 7.94   |
| p-cluster271679 | KAH7472391.1   | ERAD-associated E3 ubiquitin-protein ligase HRD1 [Phytophthora ramorum]                     | 41.98 | 69.01  | 22.87  |
| p-cluster271708 | TMW55930.1     | hypothetical protein Poli38472_008578 [Pythium oligandrum]                                  | 28.33 | 43.07  | 15.57  |
| p-cluster271864 | ETN61562.1     | importin alpha [Anopheles darlingi]                                                         | 30.00 | 88.96  | 26.82  |
| p-cluster272055 | GAX95022.1     | 50S ribosomal protein L36e [Pythium insidiosum]                                             | 91.18 | 33.33  | 31.78  |



|                 |                |                                                                                                    |        |        |        |
|-----------------|----------------|----------------------------------------------------------------------------------------------------|--------|--------|--------|
| p-cluster272079 | RLN90587.1     | hypothetical protein BBJ28_00021737 [Nothophytophthora sp. Chile5]                                 | 44.74  | 85.19  | 34.59  |
| p-cluster272100 | KUF84447.1     | hypothetical protein AM587_10000297 [Phytophthora nicotianae]                                      | 94.39  | 82.95  | 30.92  |
| p-cluster272274 | TMW69129.1     | hypothetical protein Poli38472_001285 [Pythium oligandrum]                                         | 65.17  | 42.69  | 70.99  |
| p-cluster272320 | TMW67430.1     | hypothetical protein Poli38472_011050 [Pythium oligandrum]                                         | 48.05  | 64.71  | 33.64  |
| p-cluster272381 | TMW55613.1     | hypothetical protein Poli38472_010495 [Pythium oligandrum]                                         | 58.71  | 77.58  | 43.03  |
| p-cluster272464 | TMW62987.1     | hypothetical protein Poli38472_005605 [Pythium oligandrum]                                         | 52.61  | 77.91  | 41.63  |
| p-cluster272472 | TMW58632.1     | hypothetical protein Poli38472_010191 [Pythium oligandrum]                                         | 37.59  | 26.06  | 18.92  |
| p-cluster272499 | TMW64261.1     | hypothetical protein Poli38472_012883 [Pythium oligandrum]                                         | 37.81  | 94.76  | 54.35  |
| p-cluster272507 | TMW59488.1     | hypothetical protein Poli38472_004557 [Pythium oligandrum]                                         | 46.81  | 93.74  | 30.62  |
| p-cluster272759 | POM65296.1     | Hypothetical protein PHPALM_19013 [Phytophthora palmivora var. palmivora]                          | 55.70  | 52.32  | 75.96  |
| p-cluster272803 | KAF0725274.1   | hypothetical protein Ae201684_016239 [Aphanomyces euteiches]                                       | 33.56  | 60.33  | 62.03  |
| p-cluster272928 | GAX93075.1     | protein kinase putative [Pythium insidiosum]                                                       | 74.16  | 59.38  | 9.07   |
| p-cluster273149 | GAY03281.1     | long-chain-fatty-acid-CoA ligase, putative [Pythium insidiosum]                                    | 82.86  | 96.55  | 12.99  |
| p-cluster273238 | GAY05759.1     | RNA-binding protein, putative [Pythium insidiosum]                                                 | 100.00 | 100.00 | 100.00 |
| p-cluster273369 | TYZ64244.1     | hypothetical protein PybrP1_004416, partial [[Pythium] brassicae (nom. inval.)]                    | 37.37  | 84.35  | 9.62   |
| p-cluster273582 | GAX96304.1     | CRN-like CRN14 [Pythium insidiosum]                                                                | 40.81  | 100.00 | 58.36  |
| p-cluster273595 | GAY03285.1     | ribosomal protein S18 [Pythium insidiosum]                                                         | 92.31  | 93.55  | 33.33  |
| p-cluster273675 | TMW62976.1     | hypothetical protein Poli38472_005594 [Pythium oligandrum]                                         | 44.67  | 72.08  | 14.77  |
| p-cluster273715 | KAF1320924.1   | Dicer, partial [Globisporangium splendens]                                                         | 51.65  | 53.53  | 4.39   |
| p-cluster273727 | OWZ09001.1     | LOW QUALITY PROTEIN: reverse transcriptase [Phytophthora megakarya]                                | 32.39  | 94.35  | 46.83  |
| p-cluster273819 | XP_024583005.1 | uncharacterized protein PHALS_03243, partial [Plasmopara halstedii]                                | 59.38  | 17.34  | 78.05  |
| p-cluster273885 | TMW68236.1     | hypothetical protein Poli38472_007908 [Pythium oligandrum]                                         | 65.04  | 35.60  | 16.60  |
| p-cluster273955 | KAF1333759.1   | hypothetical protein FI667_g2431, partial [Globisporangium splendens]                              | 60.27  | 48.99  | 48.67  |
| p-cluster274066 | GAY02111.1     | elicitor-like transglutaminase [Pythium insidiosum]                                                | 92.97  | 95.52  | 17.56  |
| p-cluster274081 | RQM14627.1     | hypothetical protein DD237_004486 [Peronospora effusa]                                             | 35.29  | 81.48  | 23.76  |
| p-cluster274106 | GAY01326.1     | NADH-ubiquinone oxidoreductase, putative [Pythium insidiosum]                                      | 100.00 | 27.14  | 19.43  |
| p-cluster274129 | KA8963683.1    | hypothetical protein PR002_g29213 [Phytophthora rubi]                                              | 58.18  | 55.85  | 88.71  |
| p-cluster274307 | TMW63257.1     | hypothetical protein Poli38472_002198 [Pythium oligandrum]                                         | 31.51  | 97.29  | 35.53  |
| p-cluster274626 | TMW64953.1     | hypothetical protein Poli38472_009120 [Pythium oligandrum]                                         | 32.80  | 72.22  | 16.04  |
| p-cluster274801 | RLN88384.1     | hypothetical protein BBJ28_00006152 [Nothophytophthora sp. Chile5]                                 | 38.46  | 46.76  | 14.90  |
| p-cluster275076 | RYG69685.1     | hypothetical protein EON64_02115, partial [archaeon]                                               | 34.30  | 87.61  | 7.60   |
| p-cluster275096 | TMW56555.1     | hypothetical protein Poli38472_006565 [Pythium oligandrum]                                         | 52.87  | 77.72  | 13.47  |
| p-cluster275115 | TMW56683.1     | hypothetical protein Poli38472_006693 [Pythium oligandrum]                                         | 64.10  | 97.50  | 6.46   |
| p-cluster275185 | TMW57288.1     | hypothetical protein Poli38472_003213 [Pythium oligandrum]                                         | 35.10  | 80.77  | 13.79  |
| p-cluster275195 | GAX98736.1     | copine-like protein, putative [Pythium insidiosum]                                                 | 85.71  | 87.50  | 2.27   |
| p-cluster275231 | GAY01889.1     | chromodomain-helicase-DNA-binding protein, putative [Pythium insidiosum]                           | 95.48  | 100.00 | 10.95  |
| p-cluster275281 | KAF1318776.1   | Nucleolar and coiled-body phosphoprotein 1, partial [Globisporangium splendens]                    | 72.88  | 31.22  | 11.92  |
| p-cluster275296 | TMW57815.1     | hypothetical protein Poli38472_014418 [Pythium oligandrum]                                         | 51.47  | 50.81  | 19.37  |
| p-cluster275369 | GAY02247.1     | putative glycosyl hydrolase family 5 protein [Pythium insidiosum]                                  | 98.57  | 100.00 | 9.10   |
| p-cluster275508 | GAX98698.1     | TKL protein kinase, variant [Pythium insidiosum]                                                   | 93.55  | 100.00 | 2.19   |
| p-cluster275529 | TMW56648.1     | hypothetical protein Poli38472_006658 [Pythium oligandrum]                                         | 51.38  | 71.01  | 9.30   |
| p-cluster275971 | GAX95883.1     | pepsin-like aspartic protease A1 [Pythium insidiosum]                                              | 98.68  | 100.00 | 17.47  |
| p-cluster275986 | GAY06347.1     | calcineurin-like phosphoesterase [Pythium insidiosum]                                              | 96.36  | 92.44  | 9.29   |
| p-cluster276011 | TMW65237.1     | hypothetical protein Poli38472_009404 [Pythium oligandrum]                                         | 53.78  | 97.48  | 15.32  |
| p-cluster276014 | XP_009518219.1 | hypothetical protein PHYSODRAFT_483737 [Phytophthora sojae]                                        | 38.73  | 99.16  | 5.49   |
| p-cluster276097 | TMW63147.1     | hypothetical protein Poli38472_002088 [Pythium oligandrum]                                         | 59.55  | 92.63  | 10.26  |
| p-cluster276152 | KAF4139182.1   | Autophagocytosis associated protein active-site domain-containing protein [Phytophthora infestans] | 38.82  | 100.00 | 26.15  |
| p-cluster276200 | TMW60730.1     | hypothetical protein Poli38472_000772 [Pythium oligandrum]                                         | 51.96  | 33.44  | 14.23  |
| p-cluster276366 | GAX97727.1     | Kazal-type serine proteinase inhibitor 1 [Pythium insidiosum]                                      | 84.65  | 42.49  | 80.52  |
| p-cluster276434 | GAX94250.1     | phosphatidate cytidyltransferase, putative, partial [Pythium insidiosum]                           | 70.93  | 97.65  | 14.41  |
| p-cluster276639 | TMW55411.1     | hypothetical protein Poli38472_013302 [Pythium oligandrum]                                         | 29.29  | 99.03  | 97.14  |
| p-cluster276671 | TMW55374.1     | hypothetical protein Poli38472_013265 [Pythium oligandrum]                                         | 29.27  | 49.62  | 58.69  |
| p-cluster276817 | GAY06537.1     | mitochondrial carrier, partial, partial [Pythium insidiosum]                                       | 48.57  | 78.95  | 99.34  |
| p-cluster276907 | KAF1320406.1   | hypothetical protein FI667_g12417, partial [Globisporangium splendens]                             | 44.05  | 21.56  | 18.26  |
| p-cluster276983 | TMW59745.1     | hypothetical protein Poli38472_004814 [Pythium oligandrum]                                         | 62.70  | 43.60  | 29.58  |
| p-cluster277090 | KAG1711309.1   | hypothetical protein DVH05_008562 [Phytophthora capsici]                                           | 40.24  | 54.68  | 30.59  |
| p-cluster277164 | KA89271440.1   | hypothetical protein PF008_g30354, partial [Phytophthora fragariae]                                | 40.96  | 26.71  | 38.07  |
| p-cluster277178 | GAY04316.1     | elongator complex protein putative [Pythium insidiosum]                                            | 71.79  | 60.69  | 63.37  |
| p-cluster277406 | GAY04631.1     | acetolactate synthase, small subunit [Pythium insidiosum]                                          | 88.82  | 41.28  | 80.68  |
| p-cluster277538 | TDH68998.1     | hypothetical protein CCR75_000927 [Bremia lactucae]                                                | 41.00  | 94.34  | 17.35  |
| p-cluster277547 | GAX94489.1     | peroxiredoxin-4 [Pythium insidiosum]                                                               | 88.26  | 22.39  | 48.09  |
| p-cluster277595 | TMW64064.1     | hypothetical protein Poli38472_014181 [Pythium oligandrum]                                         | 55.68  | 58.28  | 10.42  |

|                 |                |                                                                                           |        |        |        |
|-----------------|----------------|-------------------------------------------------------------------------------------------|--------|--------|--------|
| p-cluster277629 | RHZ29746.1     | hypothetical protein DYB37_001402 [Aphanomyces astaci]                                    | 65.88  | 79.38  | 95.32  |
| p-cluster277987 | TMW59800.1     | hypothetical protein Poli38472_004869 [Pythium oligandrum]                                | 34.26  | 37.18  | 21.95  |
| p-cluster278056 | KAG7397444.1   | hypothetical protein PHYBOEH_000723 [Phytophthora boehmeriae]                             | 54.31  | 46.32  | 82.48  |
| p-cluster278266 | TYZ57587.1     | hypothetical protein PybrP1_013208 [[Pythium] brassicae (nom. inval.)]                    | 58.82  | 28.23  | 21.65  |
| p-cluster278390 | GAX94165.1     | glucoamylase GlA_M [Pythium insidiosum]                                                   | 91.45  | 44.97  | 47.78  |
| p-cluster278777 | GAY00549.1     | pre-mRNA-splicing factor RSE1 [Pythium insidiosum]                                        | 75.00  | 95.19  | 4.41   |
| p-cluster278911 | GAX93679.1     | putative secreted protein [Pythium insidiosum]                                            | 79.33  | 100.00 | 100.00 |
| p-cluster279037 | KAH9148429.1   | hypothetical protein LEN26_004499, partial [Aphanomyces euteiches]                        | 64.38  | 31.30  | 36.50  |
| p-cluster279162 | TMW63676.1     | hypothetical protein Poli38472_002617 [Pythium oligandrum]                                | 35.95  | 100.00 | 25.13  |
| p-cluster279484 | KAG6587276.1   | hypothetical protein IUM83_02707 [Phytophthora cinnamomi]                                 | 83.62  | 15.47  | 98.86  |
| p-cluster279528 | KAG6609759.1   | Microfibrillar-associated protein 1 [Phytophthora cinnamomi]                              | 66.00  | 25.39  | 10.44  |
| p-cluster279533 | RHZ34837.1     | hypothetical protein DYB26_012314, partial [Aphanomyces astaci]                           | 34.40  | 50.16  | 93.43  |
| p-cluster279642 | TMW67191.1     | hypothetical protein Poli38472_012307 [Pythium oligandrum]                                | 28.34  | 94.05  | 82.64  |
| p-cluster279843 | KAF1318637.1   | hypothetical protein FI667_g13755, partial [Globisporangium splendens]                    | 62.69  | 48.88  | 93.62  |
| p-cluster279866 | GAY04851.1     | U4/U6 small nuclear ribonucleoprotein Prp3, putative [Pythium insidiosum]                 | 70.70  | 100.00 | 36.95  |
| p-cluster279903 | KAF1332213.1   | hypothetical protein FI667_g3809, partial [Globisporangium splendens]                     | 38.51  | 46.61  | 47.66  |
| p-cluster280398 | TMW67441.1     | hypothetical protein Poli38472_011061 [Pythium oligandrum]                                | 55.41  | 36.35  | 61.03  |
| p-cluster280559 | TMW69700.1     | hypothetical protein Poli38472_001856 [Pythium oligandrum]                                | 58.44  | 25.41  | 34.68  |
| p-cluster280703 | TMW67954.1     | hypothetical protein Poli38472_007626 [Pythium oligandrum]                                | 80.12  | 43.38  | 98.85  |
| p-cluster280772 | XP_045611902.1 | basic proline-rich protein-like [Procamburus clarkii]                                     | 37.46  | 47.80  | 33.25  |
| p-cluster280778 | TMW56043.1     | hypothetical protein Poli38472_008691 [Pythium oligandrum]                                | 70.71  | 69.15  | 33.50  |
| p-cluster280816 | TMW67485.1     | hypothetical protein Poli38472_011105 [Pythium oligandrum]                                | 37.50  | 76.15  | 18.66  |
| p-cluster280960 | KAE8913308.1   | hypothetical protein PF003_g2393 [Phytophthora fragariae]                                 | 34.34  | 24.62  | 45.21  |
| p-cluster281001 | GAY02013.1     | elicitin-like protein BRL1A [Pythium insidiosum]                                          | 80.28  | 94.55  | 89.08  |
| p-cluster281251 | OQR98765.1     | hypothetical protein THRCLA_21870 [Thraustotheca clavata]                                 | 24.22  | 63.05  | 35.23  |
| p-cluster281555 | GAY00204.1     | F-actin-capping protein subunit beta, putative [Pythium insidiosum]                       | 80.88  | 97.14  | 7.72   |
| p-cluster281675 | TMW69287.1     | hypothetical protein Poli38472_001443 [Pythium oligandrum]                                | 45.21  | 43.45  | 10.29  |
| p-cluster281749 | RLN62533.1     | hypothetical protein BBP00_00004701 [Phytophthora kernoviae]                              | 72.22  | 40.74  | 11.36  |
| p-cluster281952 | KAG7395501.1   | hypothetical protein PHYBOEH_003692 [Phytophthora boehmeriae]                             | 41.84  | 44.78  | 40.09  |
| p-cluster282198 | GAX93036.1     | threonine dehydratase catabolic putative [Pythium insidiosum]                             | 100.00 | 47.37  | 2.88   |
| p-cluster282404 | TMW66839.1     | hypothetical protein Poli38472_011955 [Pythium oligandrum]                                | 43.19  | 44.22  | 67.62  |
| p-cluster282512 | TMW69636.1     | hypothetical protein Poli38472_001792 [Pythium oligandrum]                                | 51.69  | 37.77  | 44.20  |
| p-cluster282513 | GAX97987.1     | cytochrome P450, putative [Pythium insidiosum]                                            | 87.20  | 40.45  | 67.89  |
| p-cluster282531 | TMW58033.1     | hypothetical protein Poli38472_013507 [Pythium oligandrum]                                | 34.24  | 95.51  | 36.69  |
| p-cluster282664 | GAX96280.1     | homeobox domain-containing protein [Pythium insidiosum]                                   | 92.14  | 64.52  | 22.29  |
| p-cluster282740 | KAG2532116.1   | hypothetical protein JM16_000494 [Phytophthora kernoviae]                                 | 40.00  | 100.00 | 50.26  |
| p-cluster283019 | TMW66982.1     | hypothetical protein Poli38472_012098 [Pythium oligandrum]                                | 61.63  | 46.23  | 91.37  |
| p-cluster283083 | TMW64390.1     | hypothetical protein Poli38472_013012 [Pythium oligandrum]                                | 65.52  | 44.62  | 25.22  |
| p-cluster283301 | TMW59996.1     | hypothetical protein Poli38472_000038 [Pythium oligandrum]                                | 65.83  | 27.11  | 12.78  |
| p-cluster283577 | TMW57971.1     | hypothetical protein Poli38472_013445 [Pythium oligandrum]                                | 59.16  | 28.73  | 59.62  |
| p-cluster283637 | TMW56825.1     | hypothetical protein Poli38472_006835 [Pythium oligandrum]                                | 28.18  | 23.16  | 28.88  |
| p-cluster283644 | TMW66084.1     | hypothetical protein Poli38472_003849 [Pythium oligandrum]                                | 54.80  | 44.17  | 33.48  |
| p-cluster283646 | KAG2996115.1   | hypothetical protein PC118_g2650 [Phytophthora cactorum]                                  | 57.14  | 86.90  | 39.69  |
| p-cluster283808 | GAX99263.1     | CMGC/DYRK/YAK protein kinase [Pythium insidiosum]                                         | 73.45  | 97.29  | 26.43  |
| p-cluster283897 | TMW63930.1     | hypothetical protein Poli38472_014635 [Pythium oligandrum]                                | 41.84  | 43.52  | 64.23  |
| p-cluster283898 | GAY02261.1     | eukaryotic translation initiation factor 3 subunit, putative [Pythium insidiosum]         | 93.23  | 48.49  | 99.86  |
| p-cluster284054 | KAG7390469.1   | hypothetical protein PHYBOEH_007029 [Phytophthora boehmeriae]                             | 52.04  | 98.68  | 74.68  |
| p-cluster284101 | KAF1315985.1   | hypothetical protein FI667_g15689, partial [Globisporangium splendens]                    | 48.26  | 39.19  | 33.66  |
| p-cluster284150 | XP_002909107.1 | myb-like DNA-binding protein, putative [Phytophthora infestans T30-4]                     | 48.72  | 22.19  | 37.19  |
| p-cluster284302 | KAF1328331.1   | hypothetical protein FI667_g6951, partial [Globisporangium splendens]                     | 33.50  | 58.89  | 61.13  |
| p-cluster284431 | GAY02843.1     | thioredoxin-like protein [Pythium insidiosum]                                             | 78.72  | 94.32  | 26.22  |
| p-cluster284544 | TMW57872.1     | hypothetical protein Poli38472_013346 [Pythium oligandrum]                                | 39.45  | 65.16  | 32.16  |
| p-cluster284663 | GAX97001.1     | inositol monophosphatase, putative [Pythium insidiosum]                                   | 89.40  | 100.00 | 28.31  |
| p-cluster284866 | GAX96532.1     | calmodulin-like protein [Pythium insidiosum]                                              | 80.15  | 50.97  | 82.31  |
| p-cluster285045 | XP_024574916.1 | CRN-like protein [Plasmopara halstedii]CEG38547.1 CRN-like protein [Plasmopara halstedii] | 35.55  | 26.90  | 33.01  |
| p-cluster285096 | KAI5642356.1   | SEA domain-containing protein [Phthorimaea operculella]                                   | 43.90  | 31.61  | 9.00   |
| p-cluster285311 | TMW66792.1     | hypothetical protein Poli38472_014104 [Pythium oligandrum]                                | 45.03  | 62.16  | 14.65  |
| p-cluster285333 | KAG1700736.1   | hypothetical protein DVH05_011595 [Phytophthora capsici]                                  | 41.11  | 100.00 | 58.39  |
| p-cluster285448 | TMW66842.1     | hypothetical protein Poli38472_011958 [Pythium oligandrum]                                | 38.21  | 36.18  | 18.59  |
| p-cluster285533 | TMW68094.1     | hypothetical protein Poli38472_007766 [Pythium oligandrum]                                | 64.00  | 21.93  | 5.40   |
| p-cluster285703 | KAG7383577.1   | hypothetical protein PHYPSEUDO_003556 [Phytophthora pseudosyringae]                       | 58.54  | 47.98  | 7.96   |
| p-cluster285933 | TMW64732.1     | hypothetical protein Poli38472_011612 [Pythium oligandrum]                                | 34.61  | 85.28  | 27.03  |

|                 |                |                                                                                         |       |        |        |
|-----------------|----------------|-----------------------------------------------------------------------------------------|-------|--------|--------|
| p-cluster286727 | TMW67123.1     | hypothetical protein Poli38472_012239 [Pythium oligandrum]                              | 32.39 | 78.60  | 69.50  |
| p-cluster286829 | TMW62866.1     | hypothetical protein Poli38472_005484 [Pythium oligandrum]                              | 48.48 | 45.96  | 17.41  |
| p-cluster286857 | MBR3273666.1   | Cna B-type domain-containing protein [Clostridia bacterium]                             | 34.10 | 71.43  | 5.18   |
| p-cluster286954 | TYZ64100.1     | hypothetical protein PybrP1_009127 [[Pythium] brassicae (nom. inval.)]                  | 48.31 | 33.29  | 49.47  |
| p-cluster287215 | TMW67345.1     | hypothetical protein Poli38472_012461 [Pythium oligandrum]                              | 59.93 | 72.70  | 34.06  |
| p-cluster287232 | TMW57575.1     | hypothetical protein Poli38472_003500 [Pythium oligandrum]                              | 30.31 | 98.22  | 52.16  |
| p-cluster287320 | GAY00751.1     | glycoprotein elicitor-like protein [Pythium insidiosum]                                 | 72.34 | 50.81  | 24.72  |
| p-cluster287361 | KAG1703749.1   | hypothetical protein DVH05_006764 [Phytophthora capsici]                                | 64.52 | 33.88  | 10.32  |
| p-cluster287511 | TMW57636.1     | hypothetical protein Poli38472_003561 [Pythium oligandrum]                              | 54.85 | 72.19  | 65.65  |
| p-cluster287592 | TMW55555.1     | hypothetical protein Poli38472_010437 [Pythium oligandrum]                              | 55.41 | 41.01  | 28.46  |
| p-cluster287664 | KAG7392418.1   | hypothetical protein PHYPSEUDO_000826 [Phytophthora pseudosyringae]                     | 46.84 | 34.65  | 3.59   |
| p-cluster287777 | TMW63914.1     | hypothetical protein Poli38472_014619 [Pythium oligandrum]                              | 68.92 | 25.69  | 13.81  |
| p-cluster288044 | TMW57703.1     | hypothetical protein Poli38472_014306 [Pythium oligandrum]                              | 71.43 | 39.85  | 63.89  |
| p-cluster288247 | KAF1334195.1   | Hect-domain containing peotein, partial [Globisporangium splendens]                     | 39.13 | 34.18  | 2.60   |
| p-cluster288771 | KAF1319008.1   | Nucleoredoxin, partial [Globisporangium splendens]                                      | 44.44 | 54.14  | 7.79   |
| p-cluster288943 | TMW55464.1     | hypothetical protein Poli38472_010346 [Pythium oligandrum]                              | 76.92 | 34.10  | 18.84  |
| p-cluster288946 | KAG3254073.1   | hypothetical protein PI124_g1312 [Phytophthora idaei]                                   | 43.03 | 99.70  | 9.27   |
| p-cluster289106 | KAG1701159.1   | hypothetical protein DVH05_011397 [Phytophthora capsici]                                | 54.82 | 96.46  | 3.31   |
| p-cluster289133 | GAX92781.1     | TKL protein kinase [Pythium insidiosum]                                                 | 68.32 | 46.92  | 9.87   |
| p-cluster289652 | RLN32079.1     | hypothetical protein BBJ28_00020207, partial [Nophophytophthora sp. Chile5]             | 55.56 | 72.26  | 71.32  |
| p-cluster289777 | TMW63729.1     | hypothetical protein Poli38472_002670 [Pythium oligandrum]                              | 31.78 | 96.19  | 22.80  |
| p-cluster289796 | TMW57596.1     | hypothetical protein Poli38472_003521 [Pythium oligandrum]                              | 35.71 | 85.58  | 6.44   |
| p-cluster289897 | TMW66169.1     | hypothetical protein Poli38472_003934 [Pythium oligandrum]                              | 42.03 | 37.30  | 3.87   |
| p-cluster289919 | RLN64429.1     | hypothetical protein BBJ29_002015 [Phytophthora kernoviae]                              | 30.53 | 90.97  | 16.86  |
| p-cluster289994 | GAX92749.1     | presenilin-like protein [Pythium insidiosum]                                            | 93.98 | 100.00 | 14.61  |
| p-cluster290022 | TMW61735.1     | hypothetical protein Poli38472_010798 [Pythium oligandrum]                              | 70.59 | 45.27  | 8.63   |
| p-cluster290129 | TMW55465.1     | hypothetical protein Poli38472_010347 [Pythium oligandrum]                              | 46.46 | 59.76  | 19.64  |
| p-cluster290160 | GAX93438.1     | TKL protein kinase [Pythium insidiosum]                                                 | 88.98 | 100.00 | 39.43  |
| p-cluster290197 | TMW57162.1     | hypothetical protein Poli38472_003087 [Pythium oligandrum]                              | 76.19 | 67.31  | 10.76  |
| p-cluster290208 | GAX95191.1     | glycosylltransferase-like domain-containing protein 1-like protein [Pythium insidiosum] | 41.76 | 100.00 | 6.18   |
| p-cluster290290 | XP_002909239.1 | conserved hypothetical protein [Phytophthora infestans T30-4]                           | 39.36 | 84.68  | 6.04   |
| p-cluster290331 | TMW57162.1     | hypothetical protein Poli38472_003087 [Pythium oligandrum]                              | 48.59 | 100.00 | 14.66  |
| p-cluster290480 | KAG9403748.1   | hypothetical protein AC1031_005238 [Aphanomyces cochlioides]                            | 49.58 | 95.20  | 0.61   |
| p-cluster290491 | TMW57161.1     | hypothetical protein Poli38472_003086 [Pythium oligandrum]                              | 70.91 | 46.61  | 2.42   |
| p-cluster291029 | TMW58064.1     | hypothetical protein Poli38472_013538 [Pythium oligandrum]                              | 39.81 | 33.12  | 54.05  |
| p-cluster291048 | GAY02043.1     | protein CREG1 precursor [Pythium insidiosum]                                            | 85.85 | 100.00 | 84.13  |
| p-cluster291194 | TMW65734.1     | hypothetical protein Poli38472_008376 [Pythium oligandrum]                              | 64.10 | 42.86  | 2.00   |
| p-cluster291271 | XP_002998910.1 | hypothetical protein PITG_23301 [Phytophthora infestans T30-4]                          | 38.10 | 23.28  | 52.29  |
| p-cluster291541 | RLN64016.1     | hypothetical protein BBP00_00003719 [Phytophthora kernoviae]                            | 42.86 | 31.40  | 70.25  |
| p-cluster291614 | TMW62172.1     | hypothetical protein Poli38472_009665 [Pythium oligandrum]                              | 34.87 | 74.63  | 83.33  |
| p-cluster291814 | TMW59836.1     | hypothetical protein Poli38472_004905 [Pythium oligandrum]                              | 27.17 | 97.73  | 53.50  |
| p-cluster292214 | TMW55330.1     | hypothetical protein Poli38472_013221 [Pythium oligandrum]                              | 45.45 | 91.04  | 29.77  |
| p-cluster292285 | TMW57096.1     | hypothetical protein Poli38472_003021 [Pythium oligandrum]                              | 62.16 | 7.63   | 2.76   |
| p-cluster292345 | TMW55376.1     | hypothetical protein Poli38472_013267 [Pythium oligandrum]                              | 46.13 | 74.17  | 64.35  |
| p-cluster292589 | KAE9020132.1   | hypothetical protein PR002_g12609, partial [Phytophthora rubi]                          | 70.45 | 35.34  | 32.00  |
| p-cluster292611 | TMW64745.1     | hypothetical protein Poli38472_011625 [Pythium oligandrum]                              | 32.85 | 23.00  | 19.26  |
| p-cluster293156 | TMW62073.1     | hypothetical protein Poli38472_009566 [Pythium oligandrum]                              | 60.82 | 38.90  | 100.00 |
| p-cluster293392 | TMW67111.1     | hypothetical protein Poli38472_012227 [Pythium oligandrum]                              | 50.46 | 93.75  | 22.71  |
| p-cluster293428 | TMW64088.1     | hypothetical protein Poli38472_014205 [Pythium oligandrum]                              | 32.65 | 64.47  | 24.37  |
| p-cluster293502 | TMW64925.1     | hypothetical protein Poli38472_009092 [Pythium oligandrum]                              | 42.34 | 87.64  | 32.12  |
| p-cluster293618 | TMW59419.1     | hypothetical protein Poli38472_004488 [Pythium oligandrum]                              | 39.30 | 63.94  | 59.98  |
| p-cluster293667 | TMW65751.1     | hypothetical protein Poli38472_008393 [Pythium oligandrum]                              | 34.69 | 94.96  | 27.10  |
| p-cluster293767 | TMW68431.1     | hypothetical protein Poli38472_005899 [Pythium oligandrum]                              | 42.03 | 99.75  | 32.36  |
| p-cluster293899 | GAX94892.1     | peptidase inhibitor 16 isoform X3 [Pythium insidiosum]                                  | 96.18 | 94.58  | 29.77  |
| p-cluster294014 | TMW68134.1     | hypothetical protein Poli38472_007806 [Pythium oligandrum]                              | 34.19 | 48.59  | 66.08  |
| p-cluster294170 | KAE8331783.1   | hypothetical protein BDV39DRAFT_218285 [Aspergillus sergii]                             | 31.55 | 98.20  | 23.45  |
| p-cluster294343 | ETO58943.1     | hypothetical protein F444_22680, partial [Phytophthora parasitica P1976]                | 42.86 | 90.91  | 85.37  |
| p-cluster294354 | KAF1331613.1   | Glutathione-disulfide reductase, partial [Globisporangium splendens]                    | 41.48 | 53.13  | 8.55   |
| p-cluster294598 | KAF5925127.1   | hypothetical protein HPG69_008804, partial [Diceros bicornis minor]                     | 60.78 | 11.28  | 44.35  |
| p-cluster294691 | GAX93491.1     | sporangia induced 28 kDa inner dynein arm light chain [Pythium insidiosum]              | 90.63 | 30.77  | 2.37   |
| p-cluster294877 | TMW68318.1     | hypothetical protein Poli38472_005786 [Pythium oligandrum]                              | 38.92 | 27.02  | 17.63  |
| p-cluster295180 | TMW55656.1     | hypothetical protein Poli38472_010538 [Pythium oligandrum]                              | 44.88 | 99.59  | 23.56  |

|                 |              |                                                                             |        |        |       |
|-----------------|--------------|-----------------------------------------------------------------------------|--------|--------|-------|
| p-cluster295268 | TMW63572.1   | hypothetical protein Poli38472_002513 [Pythium oligandrum]                  | 36.11  | 44.61  | 17.57 |
| p-cluster295516 | KAG1695369.1 | hypothetical protein DVH05_020407 [Phytophthora capsici]                    | 38.51  | 55.06  | 39.35 |
| p-cluster295527 | TMW67370.1   | hypothetical protein Poli38472_012486 [Pythium oligandrum]                  | 34.44  | 90.03  | 31.03 |
| p-cluster295655 | TYZ65097.1   | hypothetical protein PybrP1_006014 [[Pythium] brassicae (nom. inval.)]      | 48.72  | 53.06  | 12.81 |
| p-cluster295701 | TMW62925.1   | hypothetical protein Poli38472_005543 [Pythium oligandrum]                  | 60.00  | 17.37  | 23.73 |
| p-cluster295707 | TMW60715.1   | hypothetical protein Poli38472_000757 [Pythium oligandrum]                  | 56.32  | 97.18  | 15.49 |
| p-cluster295847 | TMW66206.1   | hypothetical protein Poli38472_003971 [Pythium oligandrum]                  | 48.09  | 69.68  | 32.93 |
| p-cluster295926 | TMW68805.1   | hypothetical protein Poli38472_006273 [Pythium oligandrum]                  | 63.04  | 20.72  | 4.13  |
| p-cluster296237 | TMW60909.1   | hypothetical protein Poli38472_000951 [Pythium oligandrum]                  | 55.83  | 28.30  | 9.85  |
| p-cluster296357 | KAF1315497.1 | hypothetical protein FI667_g15994, partial [Globisporangium splendens]      | 25.05  | 95.79  | 41.00 |
| p-cluster296396 | KAG2523411.1 | hypothetical protein JM16_005350 [Phytophthora kernoviae]                   | 34.59  | 75.61  | 53.26 |
| p-cluster296715 | TMW69039.1   | hypothetical protein Poli38472_001195 [Pythium oligandrum]                  | 50.00  | 61.25  | 15.77 |
| p-cluster296764 | TMW60879.1   | hypothetical protein Poli38472_000921 [Pythium oligandrum]                  | 33.01  | 39.33  | 12.77 |
| p-cluster296814 | KAG7380998.1 | hypothetical protein PHYPSEUDO_006551 [Phytophthora pseudosyringae]         | 29.29  | 54.43  | 51.47 |
| p-cluster296897 | TMW60867.1   | hypothetical protein Poli38472_000909 [Pythium oligandrum]                  | 33.07  | 54.21  | 8.55  |
| p-cluster296946 | OWY98720.1   | hypothetical protein PHMEG_00030446, partial [Phytophthora megakarya]       | 34.02  | 67.35  | 63.51 |
| p-cluster297225 | GAX99195.1   | microtubule -associated protein EB1 [Pythium insidiosum]                    | 93.44  | 96.06  | 40.53 |
| p-cluster297252 | TMW68893.1   | hypothetical protein Poli38472_002818 [Pythium oligandrum]                  | 31.25  | 86.22  | 37.31 |
| p-cluster297260 | TMW68749.1   | hypothetical protein Poli38472_006217 [Pythium oligandrum]                  | 36.99  | 80.50  | 51.49 |
| p-cluster297285 | GAY06400.1   | putative membrane protein [Pythium insidiosum]                              | 89.47  | 42.54  | 41.91 |
| p-cluster297420 | TMW66528.1   | hypothetical protein Poli38472_004293 [Pythium oligandrum]                  | 33.94  | 79.02  | 18.31 |
| p-cluster297466 | TMW65820.1   | hypothetical protein Poli38472_003585 [Pythium oligandrum]                  | 37.58  | 46.20  | 24.62 |
| p-cluster297545 | TMW57089.1   | hypothetical protein Poli38472_003014 [Pythium oligandrum]                  | 69.81  | 60.23  | 16.19 |
| p-cluster297551 | TMW68782.1   | hypothetical protein Poli38472_006250 [Pythium oligandrum]                  | 40.89  | 87.08  | 26.46 |
| p-cluster297589 | TMW64122.1   | hypothetical protein Poli38472_014239 [Pythium oligandrum]                  | 47.46  | 62.11  | 9.61  |
| p-cluster297631 | GAX97551.1   | CK1/TBK protein kinase [Pythium insidiosum]                                 | 71.57  | 33.01  | 21.54 |
| p-cluster297820 | GAY04436.1   | pepsin-like aspartic protease A1 [Pythium insidiosum]                       | 94.12  | 100.00 | 4.34  |
| p-cluster297829 | TMW60723.1   | hypothetical protein Poli38472_000765 [Pythium oligandrum]                  | 35.42  | 66.83  | 13.89 |
| p-cluster297836 | TMW64861.1   | hypothetical protein Poli38472_009028 [Pythium oligandrum]                  | 47.89  | 97.15  | 9.16  |
| p-cluster297887 | KAG1684238.1 | hypothetical protein DVH05_011515 [Phytophthora capsici]                    | 32.10  | 97.67  | 10.34 |
| p-cluster297923 | TMW63364.1   | hypothetical protein Poli38472_002305 [Pythium oligandrum]                  | 36.28  | 72.18  | 12.41 |
| p-cluster298074 | TMW60726.1   | hypothetical protein Poli38472_000768 [Pythium oligandrum]                  | 38.27  | 87.07  | 40.22 |
| p-cluster298202 | TMW65024.1   | hypothetical protein Poli38472_009191 [Pythium oligandrum]                  | 53.21  | 35.05  | 16.70 |
| p-cluster298220 | TMW68259.1   | hypothetical protein Poli38472_005727 [Pythium oligandrum]                  | 47.57  | 44.33  | 10.67 |
| p-cluster298392 | TMW62127.1   | hypothetical protein Poli38472_009620 [Pythium oligandrum]                  | 36.73  | 46.73  | 15.72 |
| p-cluster298438 | GAX99197.1   | 5'-AMP-activated protein kinase subunit beta, putative [Pythium insidiosum] | 100.00 | 100.00 | 9.26  |
| p-cluster298443 | GAY05760.1   | tubulin-tyrosine ligase family, putative [Pythium insidiosum]               | 66.67  | 68.60  | 20.46 |
| p-cluster298538 | KAH8935973.1 | hypothetical protein PF009_g14101 [Phytophthora fragariae]                  | 57.50  | 64.91  | 69.64 |
| p-cluster298608 | KAF1325166.1 | hypothetical protein FI667_g9423, partial [Globisporangium splendens]       | 35.84  | 68.73  | 38.18 |
| p-cluster298733 | TYZ57356.1   | hypothetical protein PybrP1_012956 [[Pythium] brassicae (nom. inval.)]      | 76.00  | 22.61  | 23.51 |
| p-cluster298736 | TMW66734.1   | hypothetical protein Poli38472_014046 [Pythium oligandrum]                  | 67.65  | 48.15  | 3.91  |
| p-cluster298893 | TMW57730.1   | hypothetical protein Poli38472_014333 [Pythium oligandrum]                  | 32.75  | 95.28  | 9.24  |
| p-cluster299062 | TMW67764.1   | hypothetical protein Poli38472_007436 [Pythium oligandrum]                  | 31.34  | 99.53  | 20.44 |
| p-cluster299134 | TMW58666.1   | hypothetical protein Poli38472_010225 [Pythium oligandrum]                  | 53.64  | 29.62  | 10.09 |
| p-cluster299176 | RLN96599.1   | hypothetical protein BBJ28_00000145 [Nothophytophthora sp. Chile5]          | 40.33  | 83.75  | 51.93 |
| p-cluster299190 | TMW68737.1   | hypothetical protein Poli38472_006205 [Pythium oligandrum]                  | 51.11  | 68.70  | 14.58 |
| p-cluster299229 | TMW55216.1   | hypothetical protein Poli38472_013107 [Pythium oligandrum]                  | 35.17  | 89.92  | 33.18 |
| p-cluster299270 | GAY02104.1   | protein kinase, putative [Pythium insidiosum]                               | 53.44  | 46.45  | 21.76 |
| p-cluster299619 | KAH7474589.1 | hypothetical protein KRP23_8717 [Phytophthora ramorum]                      | 34.67  | 99.34  | 26.04 |
| p-cluster299646 | TMW57288.1   | hypothetical protein Poli38472_003213 [Pythium oligandrum]                  | 26.29  | 71.34  | 21.53 |
| p-cluster299670 | TMW62668.1   | hypothetical protein Poli38472_005286 [Pythium oligandrum]                  | 53.98  | 78.93  | 44.29 |
| p-cluster299672 | KAH9244766.1 | hypothetical protein BASA81_017802 [Batrachochytrium salamandrivorans]      | 26.77  | 77.47  | 20.88 |
| p-cluster299750 | TMW66086.1   | hypothetical protein Poli38472_003851 [Pythium oligandrum]                  | 31.23  | 100.00 | 26.81 |
| p-cluster299786 | KAH8055401.1 | phosphatidylinositol kinase [Aureococcus anophagefferens]                   | 45.83  | 20.81  | 4.28  |
| p-cluster299858 | TMW55768.1   | hypothetical protein Poli38472_010650 [Pythium oligandrum]                  | 87.80  | 36.94  | 8.61  |
| p-cluster299895 | TMW60190.1   | hypothetical protein Poli38472_000232 [Pythium oligandrum]                  | 54.05  | 28.17  | 8.87  |
| p-cluster299926 | TMW65080.1   | hypothetical protein Poli38472_009247 [Pythium oligandrum]                  | 39.38  | 95.03  | 23.47 |
| p-cluster299948 | TMW69106.1   | hypothetical protein Poli38472_001262 [Pythium oligandrum]                  | 33.33  | 44.64  | 21.99 |
| p-cluster299980 | RLN71598.1   | hypothetical protein BBJ28_00022286 [Nothophytophthora sp. Chile5]          | 66.67  | 25.14  | 10.65 |
| p-cluster300214 | OWY96393.1   | Acyl-CoA synthetase [Phytophthora megakarya]                                | 53.54  | 55.75  | 22.47 |
| p-cluster300224 | TMW64941.1   | hypothetical protein Poli38472_009108 [Pythium oligandrum]                  | 40.58  | 36.56  | 13.28 |
| p-cluster300347 | KAF1318639.1 | Transcription factor skn7, partial [Globisporangium splendens]              | 37.17  | 80.46  | 30.28 |

|                 |              |                                                                                    |       |        |       |
|-----------------|--------------|------------------------------------------------------------------------------------|-------|--------|-------|
| p-cluster300437 | KAF1327428.1 | hypothetical protein FI667_g7709, partial [Globisporangium splendens]              | 50.00 | 72.04  | 23.00 |
| p-cluster300459 | CCI43339.1   | unnamed protein product [Albugo candida]                                           | 32.58 | 98.81  | 60.85 |
| p-cluster300493 | TMW55297.1   | hypothetical protein Poli38472_013188 [Pythium oligandrum]                         | 45.33 | 100.00 | 6.11  |
| p-cluster300497 | TMW63211.1   | hypothetical protein Poli38472_002152 [Pythium oligandrum]                         | 34.98 | 99.61  | 23.03 |
| p-cluster300608 | TMW65836.1   | hypothetical protein Poli38472_003601 [Pythium oligandrum]                         | 58.97 | 35.17  | 11.01 |
| p-cluster300613 | RLN90400.1   | hypothetical protein BBJ28_00014818 [Nothophytophthora sp. Chile5]                 | 36.17 | 38.10  | 16.95 |
| p-cluster300751 | TMW57697.1   | hypothetical protein Poli38472_014300 [Pythium oligandrum]                         | 27.78 | 82.49  | 11.97 |
| p-cluster300826 | TMW56286.1   | hypothetical protein Poli38472_008934 [Pythium oligandrum]                         | 41.39 | 67.90  | 11.97 |
| p-cluster300837 | KAF1330191.1 | hypothetical protein FI667_g5395, partial [Globisporangium splendens]              | 47.56 | 41.00  | 25.11 |
| p-cluster301042 | TMW55993.1   | hypothetical protein Poli38472_008641 [Pythium oligandrum]                         | 44.00 | 43.26  | 13.22 |
| p-cluster301071 | TMW60410.1   | hypothetical protein Poli38472_000452 [Pythium oligandrum]                         | 41.70 | 86.81  | 33.38 |
| p-cluster301092 | GAX96781.1   | transmembrane protein, putative [Pythium insidiosum]                               | 88.89 | 47.79  | 13.93 |
| p-cluster301097 | RLN92793.1   | hypothetical protein BBJ28_00012997 [Nothophytophthora sp. Chile5]                 | 28.40 | 97.38  | 22.88 |
| p-cluster301250 | TMW57503.1   | hypothetical protein Poli38472_003428 [Pythium oligandrum]                         | 71.15 | 38.52  | 8.33  |
| p-cluster301286 | TMW61787.1   | hypothetical protein Poli38472_010850 [Pythium oligandrum]                         | 63.06 | 56.35  | 10.69 |
| p-cluster301313 | TMW69603.1   | hypothetical protein Poli38472_001759 [Pythium oligandrum]                         | 74.47 | 49.47  | 10.80 |
| p-cluster301412 | TMW60541.1   | hypothetical protein Poli38472_000583 [Pythium oligandrum]                         | 76.60 | 55.29  | 19.11 |
| p-cluster301438 | TMW55033.1   | hypothetical protein Poli38472_013795 [Pythium oligandrum]                         | 67.65 | 77.62  | 31.62 |
| p-cluster301473 | TMW60488.1   | hypothetical protein Poli38472_000530 [Pythium oligandrum]                         | 49.31 | 44.09  | 16.83 |
| p-cluster301474 | TMW68155.1   | hypothetical protein Poli38472_007827 [Pythium oligandrum]                         | 56.12 | 30.38  | 12.37 |
| p-cluster301693 | TMW56718.1   | hypothetical protein Poli38472_006728 [Pythium oligandrum]                         | 37.32 | 95.85  | 72.49 |
| p-cluster301715 | TMW55171.1   | hypothetical protein Poli38472_013933 [Pythium oligandrum]                         | 31.55 | 95.43  | 13.84 |
| p-cluster301719 | TMW63272.1   | hypothetical protein Poli38472_002213 [Pythium oligandrum]                         | 38.03 | 85.08  | 20.91 |
| p-cluster301731 | GAY01487.1   | seryl-tRNA synthetase, partial [Pythium insidiosum]                                | 82.08 | 37.19  | 19.09 |
| p-cluster301817 | TMW57994.1   | hypothetical protein Poli38472_013468 [Pythium oligandrum]                         | 37.58 | 100.00 | 6.87  |
| p-cluster301878 | TMW68220.1   | hypothetical protein Poli38472_007892 [Pythium oligandrum]                         | 52.15 | 97.49  | 40.16 |
| p-cluster301979 | TMW69106.1   | hypothetical protein Poli38472_001262 [Pythium oligandrum]                         | 34.02 | 38.19  | 13.33 |
| p-cluster302029 | GAX95399.1   | myosin-like protein [Pythium insidiosum]                                           | 93.55 | 100.00 | 23.02 |
| p-cluster302040 | TMW60290.1   | hypothetical protein Poli38472_000332 [Pythium oligandrum]                         | 50.00 | 44.30  | 4.46  |
| p-cluster302057 | GAX92271.1   | condensin complex subunit 2, putative [Pythium insidiosum]                         | 72.49 | 100.00 | 28.24 |
| p-cluster302284 | TMW56734.1   | hypothetical protein Poli38472_006744 [Pythium oligandrum]                         | 51.29 | 97.01  | 32.29 |
| p-cluster302287 | TMW59924.1   | hypothetical protein Poli38472_004993 [Pythium oligandrum]                         | 36.74 | 75.29  | 43.18 |
| p-cluster302380 | TMW65780.1   | hypothetical protein Poli38472_008422 [Pythium oligandrum]                         | 45.87 | 100.00 | 12.58 |
| p-cluster302422 | RJP29183.1   | M20/M25/M40 family metallo-hydrolase [Candidatus Omnitrphica bacterium]            | 23.75 | 92.83  | 4.43  |
| p-cluster302450 | KAE9271432.1 | hypothetical protein PR003_g30509 [Phytophthora rubi]                              | 24.91 | 99.15  | 64.85 |
| p-cluster302517 | GAX96830.1   | 26S protease regulatory subunit 6B [Pythium insidiosum]                            | 84.00 | 24.24  | 2.92  |
| p-cluster302535 | KAF1327061.1 | hypothetical protein FI667_g7917, partial [Globisporangium splendens]              | 28.16 | 51.16  | 9.07  |
| p-cluster302546 | TMW56087.1   | hypothetical protein Poli38472_008735 [Pythium oligandrum]                         | 34.15 | 42.96  | 12.09 |
| p-cluster302601 | KXS08907.1   | hypothetical protein M427DRAFT_65057 [Gonapodya prolifera JEL478]                  | 48.10 | 52.78  | 32.51 |
| p-cluster302657 | TMW69508.1   | hypothetical protein Poli38472_001664 [Pythium oligandrum]                         | 37.44 | 100.00 | 12.57 |
| p-cluster302770 | GAY06183.1   | glutathione S-transferase, putative [Pythium insidiosum]                           | 82.98 | 61.04  | 16.91 |
| p-cluster302793 | KAE8983591.1 | hypothetical protein PR001_g23407 [Phytophthora rubi]                              | 31.72 | 79.39  | 19.89 |
| p-cluster302818 | TMW69466.1   | hypothetical protein Poli38472_001622 [Pythium oligandrum]                         | 54.31 | 48.36  | 18.53 |
| p-cluster302829 | GAX92932.1   | copper-translocating P-type ATPase [Pythium insidiosum]                            | 96.15 | 26.35  | 8.99  |
| p-cluster302880 | TMW66192.1   | hypothetical protein Poli38472_003957 [Pythium oligandrum]                         | 43.13 | 98.58  | 14.80 |
| p-cluster302882 | KAH7469081.1 | E3 ubiquitin ligase PQT3-like [Phytophthora ramorum]                               | 54.34 | 99.32  | 23.39 |
| p-cluster303015 | GAX98959.1   | argininosuccinate synthase [Pythium insidiosum]                                    | 93.18 | 42.31  | 6.12  |
| p-cluster303087 | TMW64468.1   | hypothetical protein Poli38472_011348 [Pythium oligandrum]                         | 39.90 | 75.89  | 27.34 |
| p-cluster303230 | GAX99814.1   | tRNA pseudouridine synthase, putative [Pythium insidiosum]                         | 88.89 | 65.45  | 10.50 |
| p-cluster303382 | TMW56211.1   | hypothetical protein Poli38472_008859 [Pythium oligandrum]                         | 45.76 | 99.23  | 39.75 |
| p-cluster303418 | KAG7400134.1 | WD repeat-containing protein 70 [Phytophthora boehmeriae]                          | 54.31 | 100.00 | 14.97 |
| p-cluster303672 | CCA15657.1   | conserved hypothetical protein [Albugo laibachii Nc14]                             | 44.19 | 91.40  | 14.74 |
| p-cluster303749 | TMW69126.1   | hypothetical protein Poli38472_001282 [Pythium oligandrum]                         | 45.90 | 46.25  | 11.97 |
| p-cluster303867 | KAF1314612.1 | Snf2 family helicase/atpase and F-box protein, partial [Globisporangium splendens] | 61.68 | 55.68  | 3.43  |
| p-cluster303947 | GAY04452.1   | mucin-like protein [Pythium insidiosum]                                            | 93.87 | 100.00 | 27.59 |
| p-cluster303960 | GAX94275.1   | phox domain-containing protein [Pythium insidiosum]                                | 91.75 | 100.00 | 13.49 |
| p-cluster303977 | TMW56503.1   | hypothetical protein Poli38472_006513 [Pythium oligandrum]                         | 39.46 | 76.75  | 7.43  |
| p-cluster303985 | GAY01804.1   | CMGC/DYRK/DYRK2 protein kinase [Pythium insidiosum]                                | 78.07 | 100.00 | 32.92 |
| p-cluster304092 | TMW64946.1   | hypothetical protein Poli38472_009113 [Pythium oligandrum]                         | 37.41 | 93.04  | 12.96 |
| p-cluster304170 | TMW56286.1   | hypothetical protein Poli38472_008934 [Pythium oligandrum]                         | 36.36 | 94.17  | 9.01  |
| p-cluster304274 | TMW55752.1   | hypothetical protein Poli38472_010634 [Pythium oligandrum]                         | 37.50 | 100.00 | 19.89 |
| p-cluster304302 | KAF1314693.1 | hypothetical protein FI667_g16455, partial [Globisporangium splendens]             | 35.24 | 80.38  | 30.47 |

|                 |                |                                                                                                           |       |        |       |
|-----------------|----------------|-----------------------------------------------------------------------------------------------------------|-------|--------|-------|
| p-cluster304364 | GAX95965.1     | DNA repair endonuclease XPF, putative [Pythium insidiosum]                                                | 75.00 | 70.59  | 5.56  |
| p-cluster304393 | GAY04489.1     | trehalose-phosphatase [Pythium insidiosum]                                                                | 81.01 | 75.22  | 12.74 |
| p-cluster304446 | TMW60026.1     | hypothetical protein Poli38472_000068 [Pythium oligandrum]                                                | 62.32 | 27.06  | 10.52 |
| p-cluster304514 | TMW56286.1     | hypothetical protein Poli38472_008934 [Pythium oligandrum]                                                | 46.24 | 49.21  | 4.04  |
| p-cluster304663 | KAF8819081.1   | Rna recognition motif-containing protein, partial [Cardiosporidium cionae]                                | 46.55 | 56.86  | 32.22 |
| p-cluster304674 | GAX94533.1     | chromatin assembly factor 1 subunit B-like protein [Pythium insidiosum]                                   | 76.00 | 100.00 | 11.74 |
| p-cluster304743 | KAF1313140.1   | Integrase catalytic core protein, partial [Globisporangium splendens]                                     | 45.64 | 58.20  | 8.16  |
| p-cluster304748 | TMW55415.1     | hypothetical protein Poli38472_013306 [Pythium oligandrum]                                                | 43.88 | 67.97  | 19.91 |
| p-cluster304807 | TMW56887.1     | hypothetical protein Poli38472_002812 [Pythium oligandrum]                                                | 55.00 | 98.21  | 4.43  |
| p-cluster304818 | TMW66181.1     | hypothetical protein Poli38472_003946 [Pythium oligandrum]                                                | 48.39 | 100.00 | 23.93 |
| p-cluster304938 | GAY00823.1     | peroxisome assembly factor, putative, partial [Pythium insidiosum]                                        | 70.72 | 100.00 | 42.54 |
| p-cluster304960 | TMW56434.1     | hypothetical protein Poli38472_006444 [Pythium oligandrum]                                                | 75.61 | 29.93  | 6.81  |
| p-cluster305105 | TMW64682.1     | hypothetical protein Poli38472_011562 [Pythium oligandrum]                                                | 30.14 | 89.13  | 23.54 |
| p-cluster305439 | TMW58703.1     | hypothetical protein Poli38472_010262 [Pythium oligandrum]                                                | 39.16 | 68.93  | 24.51 |
| p-cluster305461 | TMW60164.1     | hypothetical protein Poli38472_000206 [Pythium oligandrum]                                                | 43.87 | 82.57  | 41.19 |
| p-cluster305496 | GAY05730.1     | serine protease family S33, putative [Pythium insidiosum]                                                 | 51.76 | 98.84  | 14.31 |
| p-cluster305571 | RLN92091.1     | hypothetical protein BBJ28_00024042 [Nothophytophthora sp. Chile5]                                        | 37.36 | 94.83  | 28.27 |
| p-cluster305577 | TMW55578.1     | hypothetical protein Poli38472_010460 [Pythium oligandrum]                                                | 45.78 | 57.04  | 18.65 |
| p-cluster305638 | TMW68545.1     | hypothetical protein Poli38472_006013 [Pythium oligandrum]                                                | 24.47 | 99.47  | 7.69  |
| p-cluster305974 | TMW68003.1     | hypothetical protein Poli38472_007675 [Pythium oligandrum]                                                | 35.47 | 91.42  | 13.87 |
| p-cluster305995 | RLN47135.1     | hypothetical protein BBJ29_009788, partial [Phytophthora kernoviae]                                       | 97.62 | 22.58  | 73.68 |
| p-cluster306015 | KAF1319605.1   | Heat shock transcription factor, other eukaryote, partial [Globisporangium splendens]                     | 33.52 | 91.33  | 28.08 |
| p-cluster306049 | TMW61592.1     | hypothetical protein Poli38472_012783 [Pythium oligandrum]                                                | 55.28 | 53.25  | 13.41 |
| p-cluster306120 | KAF1319505.1   | Fimbrin-like protein, partial [Globisporangium splendens]                                                 | 49.52 | 87.95  | 19.69 |
| p-cluster306185 | TMW55577.1     | hypothetical protein Poli38472_010459 [Pythium oligandrum]                                                | 55.56 | 39.66  | 22.09 |
| p-cluster306187 | XP_002899156.1 | peroxisomal targeting signal 2 receptor, putative [Phytophthora infestans T30-4]                          | 48.54 | 100.00 | 17.95 |
| p-cluster306188 | TMW68755.1     | hypothetical protein Poli38472_006223 [Pythium oligandrum]                                                | 72.50 | 20.62  | 3.28  |
| p-cluster306206 | XP_009525676.1 | hypothetical protein PHYSODRAFT_314345 [Phytophthora sojae]                                               | 71.74 | 36.22  | 30.07 |
| p-cluster306236 | TMW55994.1     | hypothetical protein Poli38472_008642 [Pythium oligandrum]                                                | 45.90 | 51.26  | 6.62  |
| p-cluster306345 | TMW64410.1     | hypothetical protein Poli38472_013032 [Pythium oligandrum]                                                | 44.87 | 100.00 | 6.81  |
| p-cluster306356 | RLN15274.1     | hypothetical protein BBJ28_00016984 [Nothophytophthora sp. Chile5]                                        | 62.35 | 37.33  | 6.02  |
| p-cluster306479 | TMW57227.1     | hypothetical protein Poli38472_003152 [Pythium oligandrum]                                                | 46.07 | 54.27  | 8.20  |
| p-cluster306486 | GAY04368.1     | calpain-like protein [Pythium insidiosum]                                                                 | 83.04 | 100.00 | 20.53 |
| p-cluster306521 | GAX96765.1     | zinc finger BED domain-containing protein 1-like protein [Pythium insidiosum]                             | 82.57 | 100.00 | 21.99 |
| p-cluster306617 | TMW62162.1     | hypothetical protein Poli38472_009655 [Pythium oligandrum]                                                | 46.53 | 63.55  | 21.13 |
| p-cluster306634 | KAE9021744.1   | hypothetical protein PF011_g4792 [Phytophthora fragariae]                                                 | 35.11 | 90.64  | 5.92  |
| p-cluster306678 | TMW67351.1     | hypothetical protein Poli38472_012467 [Pythium oligandrum]                                                | 39.56 | 79.09  | 15.63 |
| p-cluster306738 | TMW58526.1     | hypothetical protein Poli38472_010085 [Pythium oligandrum]                                                | 33.79 | 95.41  | 26.57 |
| p-cluster306742 | TMW67612.1     | hypothetical protein Poli38472_011232 [Pythium oligandrum]                                                | 53.16 | 36.07  | 13.39 |
| p-cluster306757 | CCA24130.1     | conserved hypothetical protein [Albugo laibachii Nc14]                                                    | 89.47 | 26.03  | 66.28 |
| p-cluster306818 | TMW66191.1     | hypothetical protein Poli38472_003956 [Pythium oligandrum]                                                | 47.37 | 88.37  | 12.92 |
| p-cluster306859 | GAX92849.1     | AGC/PKC protein kinase [Pythium insidiosum]                                                               | 68.89 | 29.03  | 13.89 |
| p-cluster306913 | TMW62972.1     | hypothetical protein Poli38472_005590 [Pythium oligandrum]                                                | 55.41 | 41.18  | 6.51  |
| p-cluster306964 | TMW56627.1     | hypothetical protein Poli38472_006637 [Pythium oligandrum]                                                | 31.20 | 65.10  | 9.73  |
| p-cluster307254 | TMW65626.1     | hypothetical protein Poli38472_008268 [Pythium oligandrum]                                                | 36.77 | 100.00 | 15.46 |
| p-cluster307267 | TMW64993.1     | hypothetical protein Poli38472_009160 [Pythium oligandrum]                                                | 28.50 | 94.29  | 3.29  |
| p-cluster307313 | GAY00070.1     | midasin-like protein [Pythium insidiosum]                                                                 | 77.11 | 100.00 | 11.57 |
| p-cluster307435 | GAX96895.1     | dual specificity tyrosine-phosphorylation-regulated kinase, putative [Pythium insidiosum]                 | 90.54 | 81.77  | 20.85 |
| p-cluster307608 | GAX98922.1     | serine protease family S01A, putative [Pythium insidiosum]                                                | 84.80 | 100.00 | 21.66 |
| p-cluster307621 | TMW68371.1     | hypothetical protein Poli38472_005839 [Pythium oligandrum]                                                | 46.15 | 69.03  | 15.71 |
| p-cluster307796 | TYZ58417.1     | hypothetical protein PybrP1_004249 [[Pythium] brassicae (nom. inval.)]                                    | 40.63 | 98.70  | 16.33 |
| p-cluster307854 | GAX95438.1     | LOW QUALITY PROTEIN: paternally-expressed gene 3 protein-like protein [Pythium insidiosum]                | 85.63 | 100.00 | 14.04 |
| p-cluster307877 | KAF1318786.1   | hypothetical protein FI667_g13614, partial [Globisporangium splendens]                                    | 51.85 | 50.94  | 11.51 |
| p-cluster307922 | TMW61504.1     | hypothetical protein Poli38472_012695 [Pythium oligandrum]                                                | 39.76 | 100.00 | 20.94 |
| p-cluster307939 | TMW60885.1     | hypothetical protein Poli38472_000927 [Pythium oligandrum]                                                | 39.29 | 58.08  | 20.88 |
| p-cluster307966 | XP_009528850.1 | hypothetical protein PHYSODRAFT_509365 [Phytophthora sojae]                                               | 43.75 | 37.50  | 10.21 |
| p-cluster307970 | GAX99781.1     | 2oxoglutarate and iron-dependent oxygenase domain containing 1, putative [Pythium insidiosum]             | 91.39 | 93.79  | 31.82 |
| p-cluster307982 | KAF1323388.1   | Splicing factor 3a, partial [Globisporangium splendens]                                                   | 41.71 | 84.26  | 12.49 |
| p-cluster308010 | TMW62229.1     | hypothetical protein Poli38472_009722 [Pythium oligandrum]                                                | 42.07 | 66.50  | 14.96 |
| p-cluster308052 | KAF1324561.1   | Udp-n-acetylglucosamine--peptide n-acetylglucosaminyltransferase sec, partial [Globisporangium splendens] | 49.61 | 70.18  | 12.61 |
| p-cluster308054 | GAY05142.1     | U4/U6 small nuclear ribonucleoprotein Prp31 [Pythium insidiosum]                                          | 79.73 | 48.37  | 4.34  |
| p-cluster308099 | TMW55532.1     | hypothetical protein Poli38472_010414 [Pythium oligandrum]                                                | 49.73 | 100.00 | 13.64 |

|                 |                |                                                                                                   |       |        |       |
|-----------------|----------------|---------------------------------------------------------------------------------------------------|-------|--------|-------|
| p-cluster308192 | GAY04828.1     | myb-like DNA-binding protein, putative [Pythium insidiosum]                                       | 64.39 | 100.00 | 69.52 |
| p-cluster308255 | TYZ56896.1     | hypothetical protein PybrP1_003621 [[Pythium] brassicae (nom. inval.)]                            | 34.08 | 96.63  | 4.61  |
| p-cluster308288 | TMW63556.1     | hypothetical protein Poli38472_002497 [Pythium oligandrum]                                        | 35.08 | 95.45  | 34.20 |
| p-cluster308365 | TMW66161.1     | hypothetical protein Poli38472_003926 [Pythium oligandrum]                                        | 47.06 | 85.44  | 24.57 |
| p-cluster308381 | KAF0682770.1   | hypothetical protein As57867_025056, partial [Aphanomyces stellatus]                              | 37.93 | 70.53  | 8.33  |
| p-cluster308389 | GAX97376.1     | CMGC/MAPK protein kinase [Pythium insidiosum]                                                     | 89.36 | 36.43  | 8.06  |
| p-cluster308479 | GAX95191.1     | glycosyltransferase-like domain-containing protein 1-like protein [Pythium insidiosum]            | 75.71 | 88.61  | 4.86  |
| p-cluster308493 | TMW67121.1     | hypothetical protein Poli38472_012237 [Pythium oligandrum]                                        | 50.00 | 98.37  | 9.57  |
| p-cluster308506 | GAX97433.1     | ATP-dependent RNA helicase uap56 [Pythium insidiosum]                                             | 97.30 | 38.54  | 8.83  |
| p-cluster308534 | KAF1314614.1   | hypothetical protein FI667_g16536, partial [Globisporangium splendens]                            | 36.31 | 96.53  | 49.26 |
| p-cluster308641 | GAX98343.1     | phosphatidylinositol 3 and 4-kinase-like protein [Pythium insidiosum]                             | 91.40 | 100.00 | 13.63 |
| p-cluster308666 | KAG7392016.1   | hypothetical protein PHYPSEUDO_002725 [Phytophthora pseudosyringae]                               | 35.29 | 93.52  | 43.48 |
| p-cluster308676 | TMW57181.1     | hypothetical protein Poli38472_003106 [Pythium oligandrum]                                        | 56.86 | 100.00 | 32.81 |
| p-cluster308690 | TMW56503.1     | hypothetical protein Poli38472_006513 [Pythium oligandrum]                                        | 56.14 | 31.32  | 1.97  |
| p-cluster308823 | GAX98334.1     | pepsin-like aspartic protease A1 [Pythium insidiosum]                                             | 75.14 | 100.00 | 41.19 |
| p-cluster308833 | GAY03529.1     | ULK/FUSED protein kinase [Pythium insidiosum]                                                     | 74.10 | 100.00 | 42.38 |
| p-cluster308898 | RLN48464.1     | hypothetical protein BBJ28_00016009 [Nothophytophthora sp. Chile5]                                | 72.94 | 53.80  | 17.49 |
| p-cluster309063 | OQR84250.1     | hypothetical protein ACHHYP_13676 [Achlya hypogyna]                                               | 73.53 | 20.24  | 3.98  |
| p-cluster309294 | GAX98073.1     | TKL/DRK protein kinase [Pythium insidiosum]                                                       | 95.77 | 100.00 | 16.14 |
| p-cluster309322 | MVQ45756.1     | BspA family leucine-rich repeat surface protein [Roseburia intestinalis]                          | 43.30 | 59.74  | 10.68 |
| p-cluster309346 | KAF1332194.1   | Protein transporter sec31a, partial [Globisporangium splendens]                                   | 57.36 | 99.20  | 6.37  |
| p-cluster309466 | TMW59436.1     | hypothetical protein Poli38472_004505 [Pythium oligandrum]                                        | 33.68 | 58.94  | 6.39  |
| p-cluster309593 | KAH8889929.1   | ankyrin, partial [Thozetella sp. PMI_491]                                                         | 39.33 | 87.25  | 93.18 |
| p-cluster309621 | GAX96594.1     | patatin-like phospholipase, putative [Pythium insidiosum]                                         | 97.65 | 100.00 | 11.77 |
| p-cluster309627 | AGC65391.1     | OCM1, partial [Pythium insidiosum]                                                                | 94.57 | 100.00 | 18.51 |
| p-cluster309654 | KA9214195.1    | hypothetical protein PF002_g17735 [Phytophthora fragariae]                                        | 52.78 | 77.91  | 7.08  |
| p-cluster309708 | TMW65837.1     | hypothetical protein Poli38472_003602 [Pythium oligandrum]                                        | 55.70 | 82.14  | 16.83 |
| p-cluster309835 | KAH7468496.1   | hypothetical protein KRP23_10876 [Phytophthora ramorum]                                           | 35.29 | 99.33  | 13.89 |
| p-cluster309859 | GAY05085.1     | exosome complex exonuclease RRP44, putative [Pythium insidiosum]                                  | 82.05 | 99.13  | 10.66 |
| p-cluster309896 | KAF1323987.1   | Kelch repeat-containing protein, partial [Globisporangium splendens]                              | 60.00 | 44.87  | 11.73 |
| p-cluster310060 | GAX95191.1     | glycosyltransferase-like domain-containing protein 1-like protein [Pythium insidiosum]            | 82.64 | 82.88  | 8.40  |
| p-cluster310076 | XP_009518380.1 | phosphatidylinositol 3-kinase tor2-like protein [Phytophthora sojae]                              | 42.07 | 100.00 | 3.73  |
| p-cluster310084 | TMW63422.1     | hypothetical protein Poli38472_002363 [Pythium oligandrum]                                        | 42.07 | 81.71  | 37.01 |
| p-cluster310290 | TMW64929.1     | hypothetical protein Poli38472_009096 [Pythium oligandrum]                                        | 53.44 | 97.01  | 35.63 |
| p-cluster310302 | TMW64000.1     | hypothetical protein Poli38472_014705 [Pythium oligandrum]                                        | 56.76 | 68.94  | 12.97 |
| p-cluster310353 | TMW69183.1     | hypothetical protein Poli38472_001339 [Pythium oligandrum]                                        | 41.90 | 84.00  | 8.26  |
| p-cluster310451 | KAF1324005.1   | polymerase, partial [Globisporangium splendens]                                                   | 78.00 | 34.25  | 8.00  |
| p-cluster310491 | GAX98413.1     | serine protease family S15, putative [Pythium insidiosum]                                         | 95.24 | 100.00 | 8.57  |
| p-cluster310565 | TMW68844.1     | hypothetical protein Poli38472_006312 [Pythium oligandrum]                                        | 42.57 | 99.30  | 11.39 |
| p-cluster310638 | TYZ58766.1     | hypothetical protein PybrP1_003335 [[Pythium] brassicae (nom. inval.)]                            | 77.27 | 28.39  | 3.14  |
| p-cluster310688 | TMW63817.1     | hypothetical protein Poli38472_002758 [Pythium oligandrum]                                        | 40.38 | 100.00 | 2.66  |
| p-cluster310754 | TMW60514.1     | hypothetical protein Poli38472_000556 [Pythium oligandrum]                                        | 45.81 | 100.00 | 7.96  |
| p-cluster310777 | TMW66435.1     | hypothetical protein Poli38472_004200 [Pythium oligandrum]                                        | 53.13 | 84.21  | 5.18  |
| p-cluster310839 | TMW68636.1     | hypothetical protein Poli38472_006104 [Pythium oligandrum]                                        | 63.45 | 97.32  | 30.67 |
| p-cluster310848 | TMW59736.1     | hypothetical protein Poli38472_004805 [Pythium oligandrum]                                        | 54.55 | 42.76  | 10.89 |
| p-cluster310865 | GAX94661.1     | TKL protein kinase [Pythium insidiosum]                                                           | 40.00 | 78.51  | 21.44 |
| p-cluster310975 | KAF1327416.1   | hypothetical protein FI667_g7725, partial [Globisporangium splendens]                             | 39.63 | 100.00 | 13.48 |
| p-cluster311060 | TMW55908.1     | hypothetical protein Poli38472_008556 [Pythium oligandrum]                                        | 35.14 | 98.65  | 7.50  |
| p-cluster311096 | GAX99183.1     | AP-3 complex subunit delta, putative [Pythium insidiosum]                                         | 89.69 | 100.00 | 9.55  |
| p-cluster311113 | KAF1314940.1   | Krr1-interacting protein involved in 40s ribosome biogenesis, partial [Globisporangium splendens] | 82.14 | 40.15  | 7.47  |
| p-cluster311119 | GAX92729.1     | prefoldin, alpha subunit [Pythium insidiosum]                                                     | 80.29 | 97.86  | 25.44 |
| p-cluster311138 | KAG7379867.1   | hypothetical protein PHYPSEUDO_008055 [Phytophthora pseudosyringae]                               | 41.18 | 98.64  | 25.93 |
| p-cluster311162 | TMW63512.1     | hypothetical protein Poli38472_002453 [Pythium oligandrum]                                        | 37.59 | 87.07  | 10.28 |
| p-cluster311227 | TMW60821.1     | hypothetical protein Poli38472_000863 [Pythium oligandrum]                                        | 79.59 | 33.56  | 20.16 |
| p-cluster311243 | GAY04489.1     | trehalose-phosphatase [Pythium insidiosum]                                                        | 85.33 | 98.68  | 5.07  |
| p-cluster311262 | TMW63502.1     | hypothetical protein Poli38472_002443 [Pythium oligandrum]                                        | 30.08 | 91.72  | 13.70 |
| p-cluster311313 | TMW67103.1     | hypothetical protein Poli38472_012219 [Pythium oligandrum]                                        | 82.61 | 52.27  | 22.77 |
| p-cluster311395 | TMW69535.1     | hypothetical protein Poli38472_001691 [Pythium oligandrum]                                        | 44.14 | 94.44  | 13.57 |
| p-cluster311407 | TMW57252.1     | hypothetical protein Poli38472_003177 [Pythium oligandrum]                                        | 39.07 | 100.00 | 8.97  |
| p-cluster311448 | POM72776.1     | Mitochondrial Protein Translocase (MPT) Family, partial [Phytophthora palmivora var. palmivora]   | 83.82 | 51.52  | 22.82 |
| p-cluster311461 | TMW57194.1     | hypothetical protein Poli38472_003119 [Pythium oligandrum]                                        | 68.09 | 67.14  | 18.73 |
| p-cluster311470 | TYZ61701.1     | hypothetical protein PybrP1_005713 [[Pythium] brassicae (nom. inval.)]                            | 61.11 | 46.15  | 6.46  |

|                 |                |                                                                                               |       |        |        |
|-----------------|----------------|-----------------------------------------------------------------------------------------------|-------|--------|--------|
| p-cluster311528 | KAG6576309.1   | RRNA biogenesis protein rrp5 [Phytophthora cinnamomi]                                         | 42.07 | 100.00 | 6.89   |
| p-cluster311722 | GAX92473.1     | AGC/PKG protein kinase [Pythium insidiosum]                                                   | 94.38 | 64.03  | 3.12   |
| p-cluster311843 | TMW64836.1     | hypothetical protein Poli38472_009003 [Pythium oligandrum]                                    | 67.35 | 43.75  | 4.02   |
| p-cluster311987 | TMW64307.1     | hypothetical protein Poli38472_012929 [Pythium oligandrum]                                    | 35.17 | 99.25  | 11.82  |
| p-cluster311994 | TMW64993.1     | hypothetical protein Poli38472_009160 [Pythium oligandrum]                                    | 62.67 | 52.99  | 1.20   |
| p-cluster312015 | TMW62617.1     | hypothetical protein Poli38472_005235 [Pythium oligandrum]                                    | 80.77 | 39.39  | 23.21  |
| p-cluster312034 | GAX97370.1     | cyclin-H, putative [Pythium insidiosum]                                                       | 92.93 | 85.34  | 25.00  |
| p-cluster312104 | TMW60410.1     | hypothetical protein Poli38472_000452 [Pythium oligandrum]                                    | 59.52 | 75.00  | 12.46  |
| p-cluster312131 | GAY03229.1     | AGC protein kinase [Pythium insidiosum]                                                       | 78.38 | 87.95  | 9.64   |
| p-cluster312153 | GAX93228.1     | phosphomethylpyrimidine kinase [Pythium insidiosum]                                           | 95.37 | 100.00 | 10.44  |
| p-cluster312291 | GAX92922.1     | PEK/GCN2 protein kinase, variant [Pythium insidiosum]                                         | 87.70 | 93.85  | 7.56   |
| p-cluster312411 | GAY01053.1     | ARS binding protein 1 putative [Pythium insidiosum]                                           | 76.99 | 99.10  | 9.39   |
| p-cluster312447 | TMW55760.1     | hypothetical protein Poli38472_010642 [Pythium oligandrum]                                    | 55.45 | 96.12  | 19.96  |
| p-cluster312485 | XP_002905218.1 | conserved hypothetical protein [Phytophthora infestans T30-4]                                 | 52.99 | 98.40  | 40.95  |
| p-cluster312586 | TMW68006.1     | hypothetical protein Poli38472_007678 [Pythium oligandrum]                                    | 53.66 | 68.64  | 5.53   |
| p-cluster312589 | XP_009829821.1 | hypothetical protein H257_06330 [Aphanomyces astaci]                                          | 33.72 | 97.70  | 1.25   |
| p-cluster312699 | GAX97518.1     | DNA polymerase alpha catalytic subunit, putative [Pythium insidiosum]                         | 82.46 | 100.00 | 3.68   |
| p-cluster312726 | GAY02568.1     | phosphatidylinositol 3 and 4-kinase-like protein [Pythium insidiosum]                         | 85.37 | 82.83  | 8.81   |
| p-cluster312758 | KAF1336811.1   | hypothetical protein FI667_g55, partial [Globisporangium splendens]                           | 44.94 | 71.07  | 19.78  |
| p-cluster312851 | GAX99180.1     | lariat debranching enzyme B [Pythium insidiosum]                                              | 92.59 | 36.49  | 3.54   |
| p-cluster312871 | TMW63677.1     | hypothetical protein Poli38472_002618 [Pythium oligandrum]                                    | 59.62 | 46.43  | 6.03   |
| p-cluster312894 | TMW58054.1     | hypothetical protein Poli38472_013528 [Pythium oligandrum]                                    | 54.20 | 100.00 | 14.10  |
| p-cluster312922 | TMW55124.1     | hypothetical protein Poli38472_013886 [Pythium oligandrum]                                    | 54.05 | 98.67  | 2.64   |
| p-cluster312968 | RMX65345.1     | hypothetical protein DD238_004648 [Peronospora effusa]                                        | 54.67 | 96.15  | 42.13  |
| p-cluster313114 | TYZ63996.1     | hypothetical protein PybrP1_004231 [[Pythium] brassicae (nom. inval.)]                        | 45.76 | 90.77  | 3.72   |
| p-cluster313150 | GAY00045.1     | eukaryotic translation initiation factor 2-alpha kinase, putative [Pythium insidiosum]        | 70.00 | 78.26  | 15.33  |
| p-cluster313151 | TMW64692.1     | hypothetical protein Poli38472_011572 [Pythium oligandrum]                                    | 55.38 | 59.38  | 6.63   |
| p-cluster313229 | TMW60416.1     | hypothetical protein Poli38472_000458 [Pythium oligandrum]                                    | 51.67 | 100.00 | 11.54  |
| p-cluster313329 | TMW62031.1     | hypothetical protein Poli38472_009524 [Pythium oligandrum]                                    | 42.50 | 100.00 | 4.01   |
| p-cluster313371 | TMW66164.1     | hypothetical protein Poli38472_003929 [Pythium oligandrum]                                    | 50.00 | 76.58  | 4.94   |
| p-cluster313383 | XP_002909186.1 | crinkler (CRN) family protein, putative [Phytophthora infestans T30-4]                        | 69.81 | 100.00 | 7.99   |
| p-cluster313461 | GAX92473.1     | AGC/PKG protein kinase [Pythium insidiosum]                                                   | 84.62 | 100.00 | 2.25   |
| p-cluster313476 | GAY04452.1     | mucin-like protein [Pythium insidiosum]                                                       | 93.58 | 100.00 | 11.52  |
| p-cluster313484 | GAY03311.1     | Nacetylatedalphalinked acidic dipeptidase-like protein putative, partial [Pythium insidiosum] | 86.96 | 100.00 | 10.69  |
| p-cluster313552 | GAX96180.1     | WD40 repeatcontaining protein putative [Pythium insidiosum]                                   | 96.00 | 56.82  | 36.50  |
| p-cluster313646 | KAE9089031.1   | hypothetical protein PF010_g19158 [Phytophthora fragariae]                                    | 57.14 | 81.90  | 11.52  |
| p-cluster313668 | KAF1322365.1   | hypothetical protein FI667_g11339, partial [Globisporangium splendens]                        | 37.36 | 87.50  | 9.45   |
| p-cluster313701 | TMW62304.1     | hypothetical protein Poli38472_009797 [Pythium oligandrum]                                    | 52.05 | 65.22  | 8.00   |
| p-cluster313730 | GAX95730.1     | arf/Sar family, other [Pythium insidiosum]                                                    | 81.93 | 93.02  | 18.20  |
| p-cluster313906 | GAX94469.1     | U3 small nucleolar RNA-associated protein, putative [Pythium insidiosum]                      | 95.74 | 61.04  | 5.66   |
| p-cluster314023 | KAG3109560.1   | hypothetical protein PI125_g10816 [Phytophthora idaei]                                        | 30.74 | 45.55  | 58.33  |
| p-cluster314120 | TMW57791.1     | hypothetical protein Poli38472_014394 [Pythium oligandrum]                                    | 43.40 | 43.95  | 63.53  |
| p-cluster314429 | RLN75934.1     | hypothetical protein BBO99_00007958 [Phytophthora kernoviae]                                  | 32.35 | 60.37  | 99.73  |
| p-cluster314500 | KAF1317303.1   | Tkl protein kinase, partial [Globisporangium splendens]                                       | 42.78 | 42.11  | 76.48  |
| p-cluster314650 | POM63269.1     | hypothetical protein PHPALM_27441 [Phytophthora palmivora var. palmivora]                     | 29.75 | 68.04  | 68.00  |
| p-cluster314660 | KAG1695784.1   | hypothetical protein DVH05_019123 [Phytophthora capsici]                                      | 44.87 | 17.15  | 48.72  |
| p-cluster314800 | TMW56133.1     | hypothetical protein Poli38472_008781 [Pythium oligandrum]                                    | 63.01 | 28.52  | 43.90  |
| p-cluster314957 | GAY04101.1     | gastricsin [Pythium insidiosum]                                                               | 87.65 | 81.73  | 61.13  |
| p-cluster314960 | OQS04938.1     | hypothetical protein THRCLA_02872 [Thraustotheca clavata]                                     | 35.75 | 42.05  | 86.94  |
| p-cluster314984 | XP_009531023.1 | hypothetical protein PHYSODRAFT_335352 [Phytophthora sojae]                                   | 27.09 | 27.07  | 32.43  |
| p-cluster315039 | GAY01419.1     | delta l-pyrroline-5-carboxylate synthetase [Pythium insidiosum]                               | 96.54 | 40.47  | 100.00 |
| p-cluster315050 | TMW66522.1     | hypothetical protein Poli38472_004287 [Pythium oligandrum]                                    | 27.45 | 96.90  | 96.58  |
| p-cluster315122 | TMW64558.1     | hypothetical protein Poli38472_011438 [Pythium oligandrum]                                    | 55.88 | 33.51  | 10.86  |
| p-cluster315389 | KUG00113.1     | hypothetical protein AM587_10008221 [Phytophthora nicotianae]                                 | 31.64 | 75.00  | 17.38  |
| p-cluster315465 | KAG7379946.1   | hypothetical protein PHYPSEUDO_008004 [Phytophthora pseudosyringae]                           | 29.96 | 96.00  | 86.12  |
| p-cluster315671 | GAY05747.1     | replication protein [Pythium insidiosum]                                                      | 55.70 | 29.41  | 54.51  |
| p-cluster315787 | TMW56585.1     | hypothetical protein Poli38472_006595 [Pythium oligandrum]                                    | 51.74 | 26.42  | 90.51  |
| p-cluster315960 | TMW62327.1     | hypothetical protein Poli38472_009820 [Pythium oligandrum]                                    | 51.22 | 31.09  | 69.32  |
| p-cluster315964 | TMW62322.1     | hypothetical protein Poli38472_009815 [Pythium oligandrum]                                    | 41.38 | 87.60  | 62.21  |
| p-cluster316002 | GAY00282.1     | heat shock protein [Pythium insidiosum]                                                       | 87.96 | 86.99  | 31.40  |
| p-cluster316017 | TMW64551.1     | hypothetical protein Poli38472_011431 [Pythium oligandrum]                                    | 29.06 | 79.54  | 73.54  |
| p-cluster316022 | KAF1317546.1   | hypothetical protein FI667_g14720, partial [Globisporangium splendens]                        | 48.55 | 47.21  | 84.30  |



|                 |                |                                                                               |        |        |        |
|-----------------|----------------|-------------------------------------------------------------------------------|--------|--------|--------|
| p-cluster316133 | TMW64154.1     | hypothetical protein Poli38472_014271 [Pythium oligandrum]                    | 34.58  | 48.76  | 27.30  |
| p-cluster316363 | TMW57617.1     | hypothetical protein Poli38472_003542 [Pythium oligandrum]                    | 52.08  | 69.46  | 6.94   |
| p-cluster316516 | KAH9092025.1   | hypothetical protein Ae201684P_011564 [Aphanomyces euteiches]                 | 29.13  | 79.23  | 74.58  |
| p-cluster316524 | TMW57816.1     | hypothetical protein Poli38472_014419 [Pythium oligandrum]                    | 42.68  | 44.73  | 95.86  |
| p-cluster316613 | TMW69303.1     | hypothetical protein Poli38472_001459 [Pythium oligandrum]                    | 23.98  | 89.76  | 33.66  |
| p-cluster316845 | KUF93051.1     | serine/threonine-protein kinase drkB [Phytophthora nicotianae]                | 26.29  | 73.62  | 32.31  |
| p-cluster316863 | TMW57601.1     | hypothetical protein Poli38472_003526 [Pythium oligandrum]                    | 25.17  | 67.52  | 55.67  |
| p-cluster316968 | TMW61341.1     | hypothetical protein Poli38472_012532 [Pythium oligandrum]                    | 45.38  | 34.52  | 62.90  |
| p-cluster317033 | TMW63881.1     | hypothetical protein Poli38472_014791 [Pythium oligandrum]                    | 33.85  | 89.40  | 14.57  |
| p-cluster317100 | TMW57841.1     | hypothetical protein Poli38472_013315 [Pythium oligandrum]                    | 44.15  | 51.39  | 56.67  |
| p-cluster317344 | TMW57737.1     | hypothetical protein Poli38472_014340 [Pythium oligandrum]                    | 31.45  | 53.36  | 21.17  |
| p-cluster317407 | TMW59273.1     | hypothetical protein Poli38472_004342 [Pythium oligandrum]                    | 54.17  | 43.64  | 98.35  |
| p-cluster317543 | HIN78882.1     | hypothetical protein [Gemmatimonadetes bacterium]                             | 47.75  | 40.00  | 85.38  |
| p-cluster317588 | TMW68262.1     | hypothetical protein Poli38472_005730 [Pythium oligandrum]                    | 55.38  | 33.05  | 33.74  |
| p-cluster317599 | TMW65456.1     | hypothetical protein Poli38472_008098 [Pythium oligandrum]                    | 60.64  | 27.01  | 47.69  |
| p-cluster317653 | RLN49532.1     | hypothetical protein BBJ28_00016734, partial [Nothophytophthora sp. Chile5]   | 40.91  | 68.42  | 46.81  |
| p-cluster317684 | CAD2196552.1   | unnamed protein product [Meloidogyne enterolobii]                             | 33.33  | 77.85  | 23.71  |
| p-cluster317731 | GAX93857.1     | sulfatase-like protein [Pythium insidiosum]                                   | 76.19  | 15.91  | 5.73   |
| p-cluster317765 | TMW57365.1     | hypothetical protein Poli38472_003290 [Pythium oligandrum]                    | 33.08  | 77.30  | 19.74  |
| p-cluster317794 | TMW58471.1     | hypothetical protein Poli38472_010030 [Pythium oligandrum]                    | 61.63  | 44.25  | 96.74  |
| p-cluster317807 | GAX94157.1     | lipase, putative [Pythium insidiosum]                                         | 97.56  | 100.00 | 9.48   |
| p-cluster317812 | WP_192334169.1 | retention module-containing protein [Comamonas sp. CMM01]                     | 52.75  | 30.64  | 12.52  |
| p-cluster317886 | KAF1318164.1   | Fumarate hydratase, mitochondrial, partial [Globisporangium splendens]        | 47.62  | 62.05  | 8.14   |
| p-cluster317904 | TMW62926.1     | hypothetical protein Poli38472_005544 [Pythium oligandrum]                    | 26.36  | 77.01  | 82.84  |
| p-cluster317929 | TMW58480.1     | hypothetical protein Poli38472_010039 [Pythium oligandrum]                    | 72.00  | 27.62  | 96.97  |
| p-cluster317983 | KAG7391393.1   | hypothetical protein PHYPSEUDO_004928 [Phytophthora pseudosyringae]           | 24.14  | 61.50  | 59.01  |
| p-cluster318011 | TMW68343.1     | hypothetical protein Poli38472_005811 [Pythium oligandrum]                    | 70.22  | 45.05  | 99.77  |
| p-cluster318038 | TMW68096.1     | hypothetical protein Poli38472_007768 [Pythium oligandrum]                    | 41.62  | 30.26  | 78.40  |
| p-cluster318066 | RLN97074.1     | hypothetical protein BBJ28_00013629 [Nothophytophthora sp. Chile5]            | 35.03  | 64.44  | 94.79  |
| p-cluster318267 | TMW55948.1     | hypothetical protein Poli38472_008596 [Pythium oligandrum]                    | 51.02  | 48.77  | 46.82  |
| p-cluster318284 | TMW68823.1     | hypothetical protein Poli38472_006291 [Pythium oligandrum]                    | 64.68  | 40.35  | 43.79  |
| p-cluster318348 | TMW58697.1     | hypothetical protein Poli38472_010256 [Pythium oligandrum]                    | 31.52  | 54.34  | 80.77  |
| p-cluster318752 | TMW65785.1     | hypothetical protein Poli38472_008427 [Pythium oligandrum]                    | 33.62  | 38.48  | 97.85  |
| p-cluster318859 | KAF1315487.1   | reverse transcriptase, partial [Globisporangium splendens]                    | 52.12  | 37.08  | 62.50  |
| p-cluster318952 | KAF1315710.1   | Pol protein, partial [Globisporangium splendens]                              | 33.18  | 21.07  | 36.13  |
| p-cluster318962 | TMW67803.1     | hypothetical protein Poli38472_007475 [Pythium oligandrum]                    | 42.36  | 32.78  | 85.11  |
| p-cluster319016 | XP_013330623.1 | hypothetical protein T310_1993 [Rasamsonia emersonii CBS 393.64]              | 41.76  | 22.65  | 42.71  |
| p-cluster319082 | KAE9351730.1   | hypothetical protein PR003_g4760 [Phytophthora rubi]                          | 45.45  | 23.73  | 57.95  |
| p-cluster319132 | KAF1335486.1   | hypothetical protein FI667_g1174, partial [Globisporangium splendens]         | 41.22  | 77.42  | 11.66  |
| p-cluster319153 | TMW60710.1     | hypothetical protein Poli38472_000752 [Pythium oligandrum]                    | 34.63  | 69.70  | 73.85  |
| p-cluster319323 | TMW66258.1     | hypothetical protein Poli38472_004023 [Pythium oligandrum]                    | 42.76  | 58.68  | 9.20   |
| p-cluster319598 | TMW56796.1     | hypothetical protein Poli38472_006806 [Pythium oligandrum]                    | 56.15  | 45.04  | 87.31  |
| p-cluster319705 | TMW62688.1     | hypothetical protein Poli38472_005306 [Pythium oligandrum]                    | 56.65  | 48.53  | 81.80  |
| p-cluster319911 | KAF1336564.1   | hypothetical protein FI667_g503, partial [Globisporangium splendens]          | 42.45  | 41.32  | 100.00 |
| p-cluster320026 | TMW65255.1     | hypothetical protein Poli38472_009422 [Pythium oligandrum]                    | 34.17  | 68.05  | 66.19  |
| p-cluster320031 | GAY05762.1     | glyoxylate reductase/hydroxypyruvate reductase, putative [Pythium insidiosum] | 86.50  | 57.36  | 48.56  |
| p-cluster320170 | XP_008894973.1 | hypothetical protein PPTG_04482 [Phytophthora parasitica INRA-310]            | 52.34  | 37.36  | 96.07  |
| p-cluster320295 | TMW69414.1     | hypothetical protein Poli38472_001570 [Pythium oligandrum]                    | 42.35  | 54.91  | 89.73  |
| p-cluster320348 | GAY02104.1     | protein kinase, putative [Pythium insidiosum]                                 | 100.00 | 51.05  | 20.10  |
| p-cluster320647 | TMW60767.1     | hypothetical protein Poli38472_000809 [Pythium oligandrum]                    | 50.90  | 100.00 | 100.00 |
| p-cluster320671 | POM66025.1     | Hypothetical protein PHPALM_18176 [Phytophthora palmivora var. palmivora]     | 53.62  | 29.74  | 41.07  |
| p-cluster320680 | GAX98756.1     | mitochondrial substrate carrier family protein [Pythium insidiosum]           | 62.07  | 81.12  | 35.49  |
| p-cluster320687 | TMW59713.1     | hypothetical protein Poli38472_004782 [Pythium oligandrum]                    | 55.22  | 49.03  | 99.25  |
| p-cluster320718 | GAX92554.1     | COPII GTPase subunit SAR1 [Pythium insidiosum]                                | 98.75  | 36.53  | 83.77  |
| p-cluster320769 | TMW56916.1     | hypothetical protein Poli38472_002841 [Pythium oligandrum]                    | 67.71  | 49.74  | 100.00 |
| p-cluster321022 | TMW68231.1     | hypothetical protein Poli38472_007903 [Pythium oligandrum]                    | 70.76  | 26.46  | 100.00 |
| p-cluster321264 | GAX94046.1     | transmembrane protein putative [Pythium insidiosum]                           | 100.00 | 97.30  | 35.29  |
| p-cluster321398 | GAY05861.1     | leucine rich repeat protein [Pythium insidiosum]                              | 85.83  | 97.91  | 39.33  |
| p-cluster321488 | ETO59307.1     | hypothetical protein F444_22322, partial [Phytophthora parasitica P1976]      | 36.69  | 50.38  | 66.50  |
| p-cluster321529 | GAY03674.1     | inorganic pyrophosphatase, putative [Pythium insidiosum]                      | 99.64  | 37.72  | 100.00 |
| p-cluster321582 | KAF1782486.1   | hypothetical protein GQ600_12246 [Phytophthora cactorum]                      | 32.14  | 60.68  | 97.68  |
| p-cluster321632 | TMW59757.1     | hypothetical protein Poli38472_004826 [Pythium oligandrum]                    | 41.67  | 43.32  | 32.33  |

|                 |                |                                                                          |        |       |        |
|-----------------|----------------|--------------------------------------------------------------------------|--------|-------|--------|
| p-cluster321747 | TMW65787.1     | hypothetical protein Poli38472_008429 [Pythium oligandrum]               | 34.66  | 65.26 | 54.57  |
| p-cluster321801 | GAX92391.1     | myb-like DNA-binding protein, putative [Pythium insidiosum]              | 99.09  | 46.71 | 100.00 |
| p-cluster322120 | RLN58853.1     | hypothetical protein BBJ28_00010774 [Nothophytophthora sp. Chile5]       | 46.06  | 28.43 | 49.56  |
| p-cluster322122 | TMW65120.1     | hypothetical protein Poli38472_009287 [Pythium oligandrum]               | 37.02  | 50.71 | 42.42  |
| p-cluster322387 | TMW65536.1     | hypothetical protein Poli38472_008178 [Pythium oligandrum]               | 37.03  | 59.25 | 71.00  |
| p-cluster322528 | XP_012207253.1 | hypothetical protein SPRG_12218 [Saprolegnia parasitica CBS 223.65]      | 34.33  | 15.24 | 48.35  |
| p-cluster322555 | TMW58599.1     | hypothetical protein Poli38472_010158 [Pythium oligandrum]               | 27.40  | 72.18 | 81.93  |
| p-cluster322598 | KAF1319054.1   | reverse transcriptase, partial [Globisporangium splendens]               | 34.15  | 50.28 | 54.71  |
| p-cluster322679 | KUF78499.1     | Sperm-tail PG-rich repeat-containing protein 2 [Phytophthora nicotianae] | 49.20  | 70.79 | 84.65  |
| p-cluster322716 | TMW66771.1     | hypothetical protein Poli38472_014083 [Pythium oligandrum]               | 28.07  | 36.78 | 81.71  |
| p-cluster322786 | TMW55218.1     | hypothetical protein Poli38472_013109 [Pythium oligandrum]               | 63.04  | 23.86 | 91.87  |
| p-cluster322813 | TMW69640.1     | hypothetical protein Poli38472_001796 [Pythium oligandrum]               | 91.04  | 35.18 | 96.81  |
| p-cluster322973 | TMW61441.1     | hypothetical protein Poli38472_012632 [Pythium oligandrum]               | 70.59  | 17.15 | 44.25  |
| p-cluster322976 | TMW61445.1     | hypothetical protein Poli38472_012636 [Pythium oligandrum]               | 68.67  | 35.67 | 100.00 |
| p-cluster322981 | TMW61479.1     | hypothetical protein Poli38472_012670 [Pythium oligandrum]               | 54.50  | 43.52 | 84.47  |
| p-cluster322995 | TMW65739.1     | hypothetical protein Poli38472_008381 [Pythium oligandrum]               | 84.08  | 48.54 | 85.40  |
| p-cluster323120 | CAE7469296.1   | unnamed protein product [Symbiodinium pilosum]                           | 38.08  | 84.10 | 81.53  |
| p-cluster323131 | TMW67669.1     | hypothetical protein Poli38472_011289 [Pythium oligandrum]               | 47.80  | 36.04 | 58.41  |
| p-cluster323640 | TMW63172.1     | hypothetical protein Poli38472_002113 [Pythium oligandrum]               | 71.78  | 30.93 | 90.42  |
| p-cluster323662 | TMW60617.1     | hypothetical protein Poli38472_000659 [Pythium oligandrum]               | 47.04  | 40.35 | 99.66  |
| p-cluster323673 | TMW60606.1     | hypothetical protein Poli38472_000648 [Pythium oligandrum]               | 77.13  | 17.57 | 67.77  |
| p-cluster323702 | TMW64157.1     | hypothetical protein Poli38472_014274 [Pythium oligandrum]               | 46.74  | 50.87 | 63.09  |
| p-cluster323750 | CEJ81816.1     | hypothetical protein VHEMI01926 [[Torrubiella] hemipterigena]            | 34.21  | 37.31 | 88.17  |
| p-cluster323794 | XP_024586380.1 | uncharacterized protein PHALS_07741 [Plasmopara halstedii]               | 40.55  | 40.35 | 47.30  |
| p-cluster323961 | KAF1315734.1   | hypothetical protein FI667_g15840, partial [Globisporangium splendens]   | 22.76  | 56.44 | 13.80  |
| p-cluster324077 | TMW57852.1     | hypothetical protein Poli38472_013326 [Pythium oligandrum]               | 77.67  | 38.13 | 84.20  |
| p-cluster324121 | TYZ61674.1     | hypothetical protein PybrP1_010673 [[Pythium] brassicae (nom. inval.)]   | 50.00  | 52.80 | 15.38  |
| p-cluster324498 | GAY02711.1     | replication protein [Pythium insidiosum]                                 | 100.00 | 36.08 | 85.98  |
| p-cluster324726 | GAY05927.1     | Ribosomal protein S23 putative [Pythium insidiosum]                      | 100.00 | 13.66 | 91.72  |
| p-cluster324836 | GAY04598.1     | tubulin/FtsZ family [Pythium insidiosum]                                 | 92.97  | 34.55 | 99.53  |
| p-cluster324861 | KAE8968253.1   | hypothetical protein PR002_g27812 [Phytophthora rubi]                    | 41.10  | 45.09 | 91.10  |
| p-cluster324929 | KAF1330747.1   | Sep-like extracellular protein, partial [Globisporangium splendens]      | 43.10  | 58.01 | 95.52  |
| p-cluster324969 | WP_090320517.1 | leucine-rich repeat domain-containing protein [Nitrosomonas oligotropha] | 32.32  | 46.87 | 26.42  |
| p-cluster325164 | KAF1328250.1   | Lhy protein, partial [Globisporangium splendens]                         | 45.93  | 15.61 | 39.18  |
| p-cluster325301 | TMW57620.1     | hypothetical protein Poli38472_003545 [Pythium oligandrum]               | 60.00  | 40.85 | 50.00  |
| p-cluster325319 | TMW64137.1     | hypothetical protein Poli38472_014254 [Pythium oligandrum]               | 41.36  | 50.52 | 95.99  |
| p-cluster325365 | TMW56761.1     | hypothetical protein Poli38472_006771 [Pythium oligandrum]               | 69.41  | 44.59 | 98.26  |
| p-cluster325366 | TDH67035.1     | hypothetical protein CCR75_005281 [Bremia lactucae]                      | 45.40  | 67.62 | 25.80  |
| p-cluster325586 | TMW65643.1     | hypothetical protein Poli38472_008285 [Pythium oligandrum]               | 55.90  | 34.87 | 99.16  |
| p-cluster325605 | TMW67817.1     | hypothetical protein Poli38472_007489 [Pythium oligandrum]               | 40.87  | 60.65 | 96.07  |
| p-cluster325735 | GAX96833.1     | 2Fe-2S ferredoxin, putative [Pythium insidiosum]                         | 98.21  | 49.12 | 100.00 |
| p-cluster325752 | GAY05747.1     | replication protein [Pythium insidiosum]                                 | 33.63  | 37.63 | 39.41  |
| p-cluster325819 | TMW63257.1     | hypothetical protein Poli38472_002198 [Pythium oligandrum]               | 44.86  | 54.43 | 100.00 |
| p-cluster326032 | TMW56530.1     | hypothetical protein Poli38472_006540 [Pythium oligandrum]               | 28.53  | 56.46 | 90.80  |
| p-cluster326060 | GAX94263.1     | TKL protein kinase [Pythium insidiosum]                                  | 92.31  | 77.50 | 14.62  |
| p-cluster326081 | KAF1318034.1   | hypothetical protein FI667_g14263, partial [Globisporangium splendens]   | 47.83  | 41.01 | 18.11  |
| p-cluster326130 | TMW62243.1     | hypothetical protein Poli38472_009736 [Pythium oligandrum]               | 29.30  | 61.20 | 93.36  |
| p-cluster326190 | KAI3656794.1   | hypothetical protein MP638_004171, partial [Amoebophilidium occidentale] | 37.93  | 37.62 | 73.97  |
| p-cluster326343 | TMW62696.1     | hypothetical protein Poli38472_005314 [Pythium oligandrum]               | 40.34  | 40.14 | 24.33  |
| p-cluster326349 | TMW62713.1     | hypothetical protein Poli38472_005331 [Pythium oligandrum]               | 46.98  | 33.46 | 47.72  |
| p-cluster326368 | TMW61989.1     | hypothetical protein Poli38472_009482 [Pythium oligandrum]               | 49.47  | 58.70 | 25.11  |
| p-cluster326394 | XP_009845798.1 | hypothetical protein H257_18442 [Aphanomyces astaci]                     | 45.09  | 10.70 | 90.10  |
| p-cluster326586 | CAB1097217.1   | unnamed protein product [Ectocarpus sp. CCAP 1310/34]                    | 26.95  | 86.17 | 1.40   |
| p-cluster326908 | TMW55566.1     | hypothetical protein Poli38472_010448 [Pythium oligandrum]               | 50.97  | 26.24 | 71.94  |
| p-cluster326993 | KAG1694207.1   | hypothetical protein DVH05_021863 [Phytophthora capsici]                 | 23.52  | 63.31 | 48.45  |
| p-cluster327001 | TMW59054.1     | hypothetical protein Poli38472_007199 [Pythium oligandrum]               | 56.73  | 41.62 | 90.66  |
| p-cluster327004 | TMW58628.1     | hypothetical protein Poli38472_010187 [Pythium oligandrum]               | 30.32  | 44.98 | 14.85  |
| p-cluster327051 | GAY00889.1     | centrosome-associated protein, putative [Pythium insidiosum]             | 67.25  | 73.36 | 28.45  |
| p-cluster327099 | TMW67389.1     | hypothetical protein Poli38472_011009 [Pythium oligandrum]               | 45.85  | 34.57 | 60.75  |
| p-cluster327312 | KAE8878500.1   | hypothetical protein PF003_g37346 [Phytophthora fragariae]               | 46.89  | 92.48 | 31.00  |
| p-cluster327396 | TMW55299.1     | hypothetical protein Poli38472_013190 [Pythium oligandrum]               | 64.56  | 40.65 | 100.00 |
| p-cluster327419 | TMW61209.1     | hypothetical protein Poli38472_013672 [Pythium oligandrum]               | 27.52  | 39.86 | 53.88  |

|                 |                |                                                                                |        |        |        |
|-----------------|----------------|--------------------------------------------------------------------------------|--------|--------|--------|
| p-cluster327538 | KAF1322448.1   | hypothetical protein FI667_g11173, partial [Globisporangium splendens]         | 54.50  | 41.27  | 98.92  |
| p-cluster327721 | GAX97649.1     | charged multivesicular body protein 2a [Pythium insidiosum]                    | 99.57  | 48.76  | 100.00 |
| p-cluster327779 | ETI34159.1     | hypothetical protein F443_19290 [Phytophthora parasitica P1569]                | 57.38  | 52.55  | 87.56  |
| p-cluster327833 | GAY03794.1     | F-box protein, putative [Pythium insidiosum]                                   | 89.33  | 87.21  | 19.84  |
| p-cluster328061 | KAF1328454.1   | hypothetical protein FI667_g6865, partial [Globisporangium splendens]          | 46.46  | 45.24  | 45.54  |
| p-cluster328071 | TMW65305.1     | hypothetical protein Poli38472_007947 [Pythium oligandrum]                     | 52.66  | 34.10  | 28.63  |
| p-cluster328123 | TMW66085.1     | hypothetical protein Poli38472_003850 [Pythium oligandrum]                     | 49.29  | 38.67  | 39.70  |
| p-cluster328185 | GAY04101.1     | gastricin [Pythium insidiosum]                                                 | 75.61  | 9.38   | 15.47  |
| p-cluster328239 | XP_024580671.1 | uncharacterized protein PHALS_00671 [Plasmopara halstedii]                     | 32.56  | 43.43  | 29.72  |
| p-cluster328469 | POM74496.1     | Hypothetical protein PHPALM_8533 [Phytophthora palmivora var. palmivora]       | 31.26  | 69.42  | 95.17  |
| p-cluster328655 | TMW57324.1     | hypothetical protein Poli38472_003249 [Pythium oligandrum]                     | 27.42  | 69.79  | 88.81  |
| p-cluster328729 | GAY00460.1     | serine protease family S33, putative [Pythium insidiosum]                      | 80.53  | 97.84  | 36.20  |
| p-cluster328855 | TMW60256.1     | hypothetical protein Poli38472_000298 [Pythium oligandrum]                     | 60.42  | 29.63  | 5.71   |
| p-cluster328869 | TMW68867.1     | hypothetical protein Poli38472_001023 [Pythium oligandrum]                     | 41.27  | 78.23  | 88.43  |
| p-cluster328926 | TYZ61834.1     | hypothetical protein PybrP1_000946 [[Pythium] brassicae (nom. inval.)]         | 61.54  | 16.16  | 26.95  |
| p-cluster329059 | XP_012197280.1 | hypothetical protein SPRG_03313 [Saprolegnia parasitica CBS 223.65]            | 46.24  | 30.29  | 46.59  |
| p-cluster329235 | TMW64072.1     | hypothetical protein Poli38472_014189 [Pythium oligandrum]                     | 41.91  | 32.02  | 76.92  |
| p-cluster329330 | TMW55178.1     | hypothetical protein Poli38472_013940 [Pythium oligandrum]                     | 32.69  | 92.77  | 96.30  |
| p-cluster329337 | GAY03407.1     | phosphatidylinositol 3 and 4-kinase-like protein, partial [Pythium insidiosum] | 91.94  | 13.72  | 7.79   |
| p-cluster329464 | TMW64387.1     | hypothetical protein Poli38472_013009 [Pythium oligandrum]                     | 48.63  | 49.65  | 22.12  |
| p-cluster329482 | XP_009527062.1 | hypothetical protein PHYSODRAFT_331892 [Phytophthora sojae]                    | 32.43  | 47.84  | 24.94  |
| p-cluster329539 | GAY01107.1     | dynein light chain [Pythium insidiosum]                                        | 100.00 | 26.32  | 18.39  |
| p-cluster329546 | GAY01113.1     | DNA polymerase delta catalytic subunit [Pythium insidiosum]                    | 99.49  | 24.94  | 98.50  |
| p-cluster329709 | TMW59458.1     | hypothetical protein Poli38472_004527 [Pythium oligandrum]                     | 46.42  | 85.70  | 82.91  |
| p-cluster329713 | GAY02610.1     | GPI-anchored leucine-rich lipoprotein [Pythium insidiosum]                     | 87.59  | 43.89  | 92.36  |
| p-cluster329766 | GAY04393.1     | mannosyl-oligosaccharide alpha-1,2-mannosidase, putative [Pythium insidiosum]  | 81.77  | 66.44  | 16.72  |
| p-cluster329952 | TMW63566.1     | hypothetical protein Poli38472_002507 [Pythium oligandrum]                     | 79.10  | 28.49  | 63.54  |
| p-cluster329954 | TMW63568.1     | hypothetical protein Poli38472_002509 [Pythium oligandrum]                     | 68.42  | 27.57  | 27.62  |
| p-cluster330068 | TMW57737.1     | hypothetical protein Poli38472_014340 [Pythium oligandrum]                     | 26.15  | 77.91  | 40.53  |
| p-cluster330121 | TMW56237.1     | hypothetical protein Poli38472_008885 [Pythium oligandrum]                     | 37.40  | 97.28  | 99.02  |
| p-cluster330145 | TMW66219.1     | hypothetical protein Poli38472_003984 [Pythium oligandrum]                     | 61.88  | 48.97  | 56.44  |
| p-cluster330199 | GAX94126.1     | pre-mRNA polyadenylation factor, putative, partial [Pythium insidiosum]        | 81.88  | 43.75  | 73.09  |
| p-cluster330203 | XP_009844223.1 | hypothetical protein H257_17218 [Aphanomyces astaci]                           | 47.83  | 19.08  | 44.97  |
| p-cluster330222 | TMW68678.1     | hypothetical protein Poli38472_006146 [Pythium oligandrum]                     | 37.83  | 90.55  | 23.45  |
| p-cluster330255 | TMW61062.1     | hypothetical protein Poli38472_014523 [Pythium oligandrum]                     | 60.54  | 28.41  | 98.15  |
| p-cluster330291 | KAF1332625.1   | hypothetical protein FI667_g3589, partial [Globisporangium splendens]          | 43.06  | 13.83  | 75.79  |
| p-cluster330339 | XP_009534332.1 | hypothetical protein PHYSODRAFT_523336 [Phytophthora sojae]                    | 30.11  | 65.30  | 20.95  |
| p-cluster330694 | TMW57192.1     | hypothetical protein Poli38472_003117 [Pythium oligandrum]                     | 44.40  | 96.51  | 97.67  |
| p-cluster330909 | KAH7509569.1   | hypothetical protein KRP22_1069 [Phytophthora ramorum]                         | 44.23  | 62.67  | 4.28   |
| p-cluster330978 | GAY01393.1     | ATP-dependent chaperone ClpB [Pythium insidiosum]                              | 97.93  | 49.61  | 99.74  |
| p-cluster331147 | TYZ60874.1     | hypothetical protein PybrP1_001446 [[Pythium] brassicae (nom. inval.)]         | 49.35  | 55.64  | 6.75   |
| p-cluster331219 | KAF4148815.1   | hypothetical protein GN958_ATG02013 [Phytophthora infestans]                   | 28.14  | 99.65  | 31.47  |
| p-cluster331240 | TMW55564.1     | hypothetical protein Poli38472_010446 [Pythium oligandrum]                     | 59.31  | 44.39  | 93.77  |
| p-cluster331385 | TMW63233.1     | hypothetical protein Poli38472_002174 [Pythium oligandrum]                     | 30.07  | 97.22  | 97.14  |
| p-cluster331400 | KAE9063360.1   | hypothetical protein PF010_g29023 [Phytophthora fragariae]                     | 35.76  | 16.83  | 81.18  |
| p-cluster331407 | KAG7389577.1   | hypothetical protein PHYBOEH_007414 [Phytophthora boehmeriae]                  | 42.37  | 43.26  | 71.86  |
| p-cluster331497 | TMW58121.1     | hypothetical protein Poli38472_011709 [Pythium oligandrum]                     | 38.30  | 50.14  | 96.47  |
| p-cluster331544 | TMW55196.1     | hypothetical protein Poli38472_013087 [Pythium oligandrum]                     | 88.69  | 26.79  | 98.21  |
| p-cluster331614 | KAE9052009.1   | hypothetical protein PR001_g915 [Phytophthora rubi]                            | 44.55  | 27.64  | 30.25  |
| p-cluster332019 | TMW55989.1     | hypothetical protein Poli38472_008637 [Pythium oligandrum]                     | 42.56  | 62.98  | 94.64  |
| p-cluster332078 | TMW61954.1     | hypothetical protein Poli38472_009447 [Pythium oligandrum]                     | 61.66  | 43.04  | 100.00 |
| p-cluster332335 | KAF4037588.1   | CCCH-type zinc finger [Phytophthora infestans]                                 | 37.67  | 81.92  | 88.98  |
| p-cluster332377 | GAX93164.1     | histone methylation protein DOT1, putative [Pythium insidiosum]                | 82.09  | 51.94  | 35.08  |
| p-cluster332409 | TMW67373.1     | hypothetical protein Poli38472_012489 [Pythium oligandrum]                     | 76.92  | 8.64   | 19.92  |
| p-cluster332430 | TMW55473.1     | hypothetical protein Poli38472_010355 [Pythium oligandrum]                     | 59.59  | 32.77  | 97.29  |
| p-cluster332565 | TMW63653.1     | hypothetical protein Poli38472_002594 [Pythium oligandrum]                     | 50.65  | 23.58  | 19.83  |
| p-cluster332737 | TMW60798.1     | hypothetical protein Poli38472_000840 [Pythium oligandrum]                     | 75.00  | 34.29  | 23.12  |
| p-cluster332743 | KAG2774714.1   | hypothetical protein Peac1_g14466 [Phytophthora cactorum]                      | 57.14  | 30.77  | 12.88  |
| p-cluster332777 | RLN74237.1     | hypothetical protein BBJ28_00000600 [Nothophytophthora sp. Chile5]             | 47.73  | 32.82  | 45.36  |
| p-cluster332807 | TMW64877.1     | hypothetical protein Poli38472_009044 [Pythium oligandrum]                     | 52.63  | 49.67  | 7.06   |
| p-cluster332812 | TYZ64128.1     | hypothetical protein PybrP1_001652 [[Pythium] brassicae (nom. inval.)]         | 23.71  | 96.53  | 10.40  |
| p-cluster332910 | GAY02518.1     | elicitor-like transglutaminase [Pythium insidiosum]                            | 91.76  | 100.00 | 10.61  |

|                 |                |                                                                           |        |        |        |
|-----------------|----------------|---------------------------------------------------------------------------|--------|--------|--------|
| p-cluster332980 | TMW55659.1     | hypothetical protein Poli38472_010541 [Pythium oligandrum]                | 38.51  | 41.24  | 91.46  |
| p-cluster333145 | TMW69476.1     | hypothetical protein Poli38472_001632 [Pythium oligandrum]                | 55.94  | 22.24  | 87.20  |
| p-cluster333243 | RLN88144.1     | hypothetical protein BBJ28_00022437 [Nothophytophthora sp. Chile5]        | 31.56  | 80.99  | 21.51  |
| p-cluster333356 | TMW56655.1     | hypothetical protein Poli38472_006665 [Pythium oligandrum]                | 44.83  | 28.03  | 28.02  |
| p-cluster333380 | GAY06300.1     | DNA-binding protein RHL1-like protein [Pythium insidiosum]                | 74.44  | 91.36  | 35.32  |
| p-cluster333398 | TMW63398.1     | hypothetical protein Poli38472_002339 [Pythium oligandrum]                | 26.19  | 73.48  | 20.30  |
| p-cluster333411 | KAF1328096.1   | Ring finger protein nhl-1, partial [Globisporangium splendens]            | 45.16  | 33.58  | 15.64  |
| p-cluster333510 | TMW68375.1     | hypothetical protein Poli38472_005843 [Pythium oligandrum]                | 48.15  | 76.06  | 22.22  |
| p-cluster333539 | GAX99639.1     | autophagy-like protein 8 [Pythium insidiosum]                             | 95.12  | 46.95  | 99.15  |
| p-cluster333543 | KAH9264525.1   | hypothetical protein BASA83_011996 [Batrachochytrium salamandrivorans]    | 29.82  | 28.89  | 57.09  |
| p-cluster333601 | TMW58495.1     | hypothetical protein Poli38472_010054 [Pythium oligandrum]                | 59.48  | 44.61  | 50.00  |
| p-cluster333686 | TMW61207.1     | hypothetical protein Poli38472_013670 [Pythium oligandrum]                | 40.00  | 87.84  | 75.32  |
| p-cluster333688 | ETI29765.1     | hypothetical protein F443_23119, partial [Phytophthora parasitica P1569]  | 41.94  | 17.42  | 43.06  |
| p-cluster333707 | TMW60135.1     | hypothetical protein Poli38472_000177 [Pythium oligandrum]                | 65.85  | 44.97  | 100.00 |
| p-cluster333891 | TMW59141.1     | hypothetical protein Poli38472_007286 [Pythium oligandrum]                | 33.33  | 56.31  | 44.57  |
| p-cluster333935 | TMW57596.1     | hypothetical protein Poli38472_003521 [Pythium oligandrum]                | 37.50  | 65.79  | 6.19   |
| p-cluster333938 | KAH8990206.1   | hypothetical protein PR002_g21217 [Phytophthora rubi]                     | 45.00  | 32.97  | 17.19  |
| p-cluster333966 | TMW55679.1     | hypothetical protein Poli38472_010561 [Pythium oligandrum]                | 50.77  | 45.32  | 12.08  |
| p-cluster334092 | TMW62303.1     | hypothetical protein Poli38472_009796 [Pythium oligandrum]                | 63.80  | 40.75  | 99.54  |
| p-cluster334756 | KAH9345656.1   | hypothetical protein PF008_g8640 [Phytophthora fragariae]                 | 35.36  | 14.51  | 22.85  |
| p-cluster334779 | TMW63235.1     | hypothetical protein Poli38472_002176 [Pythium oligandrum]                | 36.33  | 60.14  | 29.69  |
| p-cluster335165 | OWZ21837.1     | RNA (guanine-9-)-methyltransferase [Phytophthora megakarya]               | 57.94  | 78.52  | 40.38  |
| p-cluster335285 | TDH68553.1     | hypothetical protein CCR75_000293 [Bremia lactucae]                       | 40.17  | 94.96  | 41.92  |
| p-cluster335307 | TMW55951.1     | hypothetical protein Poli38472_008599 [Pythium oligandrum]                | 52.47  | 33.85  | 36.30  |
| p-cluster335636 | KUF76044.1     | Coiled-coil domain-containing protein [Phytophthora nicotianae]           | 50.54  | 84.47  | 53.29  |
| p-cluster336302 | CCA17226.1     | conserved hypothetical protein [Albugo laibachii Ne14]                    | 28.14  | 58.82  | 61.51  |
| p-cluster336332 | TMW67825.1     | hypothetical protein Poli38472_007497 [Pythium oligandrum]                | 61.27  | 29.77  | 75.00  |
| p-cluster336463 | GAX95999.1     | exonuclease 1, putative, partial [Pythium insidiosum]                     | 100.00 | 31.07  | 24.19  |
| p-cluster336490 | KAF1329266.1   | hypothetical protein FI667_g6005, partial [Globisporangium splendens]     | 33.71  | 28.03  | 22.02  |
| p-cluster336498 | GAY04700.1     | chromatin assembly factor 1 subunit B-like protein [Pythium insidiosum]   | 96.22  | 90.24  | 29.32  |
| p-cluster336679 | TMW61205.1     | hypothetical protein Poli38472_013668 [Pythium oligandrum]                | 30.98  | 54.22  | 24.12  |
| p-cluster336743 | TMW67314.1     | hypothetical protein Poli38472_012430 [Pythium oligandrum]                | 31.43  | 70.04  | 64.81  |
| p-cluster337011 | CAG8510172.1   | 16020_tCDS:2 [Funnelformis caledonium]                                    | 50.47  | 37.68  | 11.05  |
| p-cluster337230 | TMW55696.1     | hypothetical protein Poli38472_010578 [Pythium oligandrum]                | 37.13  | 66.31  | 90.42  |
| p-cluster337375 | TMW56643.1     | hypothetical protein Poli38472_006653 [Pythium oligandrum]                | 59.65  | 28.08  | 17.70  |
| p-cluster337826 | GAX98005.1     | seryl-tRNA synthetase [Pythium insidiosum]                                | 87.85  | 44.34  | 98.94  |
| p-cluster337922 | TMW58276.1     | hypothetical protein Poli38472_011864 [Pythium oligandrum]                | 81.39  | 45.83  | 92.01  |
| p-cluster338261 | KAF0730094.1   | hypothetical protein Ae201684_012390 [Aphanomyces euteiches]              | 51.78  | 29.50  | 96.26  |
| p-cluster338428 | OQS04262.1     | Crinkler (CRN) family protein [Thraustotheca clavata]                     | 84.62  | 46.43  | 11.71  |
| p-cluster338733 | TMW69842.1     | hypothetical protein Poli38472_001998 [Pythium oligandrum]                | 74.65  | 32.27  | 46.41  |
| p-cluster339123 | TMW57152.1     | hypothetical protein Poli38472_003077 [Pythium oligandrum]                | 25.00  | 56.18  | 98.11  |
| p-cluster339143 | TMW58168.1     | hypothetical protein Poli38472_011756 [Pythium oligandrum]                | 52.08  | 34.34  | 54.03  |
| p-cluster339226 | TMW57092.1     | hypothetical protein Poli38472_003017 [Pythium oligandrum]                | 57.58  | 65.00  | 8.88   |
| p-cluster339527 | TMW68857.1     | hypothetical protein Poli38472_001013 [Pythium oligandrum]                | 66.20  | 42.07  | 83.91  |
| p-cluster339978 | KAG7388086.1   | hypothetical protein PHYBOEH_008011 [Phytophthora boehmeriae]             | 42.74  | 84.23  | 87.23  |
| p-cluster340696 | POM67973.1     | Hypothetical protein PHPALM_15923 [Phytophthora palmivora var. palmivora] | 56.38  | 5.57   | 41.23  |
| p-cluster341603 | GAX98550.1     | putative methyltransferase METT10D [Pythium insidiosum]                   | 54.26  | 85.43  | 26.83  |
| p-cluster342914 | TMW62596.1     | hypothetical protein Poli38472_005214 [Pythium oligandrum]                | 33.69  | 96.81  | 46.27  |
| p-cluster343160 | TMW65804.1     | hypothetical protein Poli38472_003569 [Pythium oligandrum]                | 51.56  | 52.50  | 18.18  |
| p-cluster343376 | GAX92779.1     | homeodomain transcription factor, putative [Pythium insidiosum]           | 68.92  | 57.81  | 13.03  |
| p-cluster343407 | XP_009828220.1 | DNA topoisomerase VI, B subunit, variant [Aphanomyces astaci]             | 59.11  | 99.02  | 26.27  |
| p-cluster343433 | KAE8983593.1   | hypothetical protein PR001_g23409 [Phytophthora rubi]                     | 59.62  | 88.14  | 41.27  |
| p-cluster343629 | KAE9167965.1   | hypothetical protein PF002_g30739, partial [Phytophthora fragariae]       | 25.74  | 97.27  | 54.13  |
| p-cluster344080 | GAY02875.1     | exosome complex exonuclease RRP45-like protein [Pythium insidiosum]       | 96.46  | 100.00 | 22.97  |
| p-cluster344529 | TMW62212.1     | hypothetical protein Poli38472_009705 [Pythium oligandrum]                | 69.97  | 32.64  | 83.92  |
| p-cluster344807 | RQM27221.1     | hypothetical protein B5M09_009506 [Aphanomyces astaci]                    | 25.26  | 83.05  | 76.77  |
| p-cluster344976 | GAY05747.1     | replication protein [Pythium insidiosum]                                  | 38.49  | 44.26  | 50.09  |
| p-cluster344982 | RMX62774.1     | hypothetical protein DD238_007334 [Peronospora effusa]                    | 55.68  | 84.85  | 14.18  |
| p-cluster345730 | RLN44037.1     | hypothetical protein BBJ28_00024823 [Nothophytophthora sp. Chile5]        | 34.53  | 19.94  | 27.70  |
| p-cluster346261 | KAE9317214.1   | hypothetical protein PR003_g18528 [Phytophthora rubi]                     | 33.33  | 50.68  | 15.77  |
| p-cluster346505 | GAX92592.1     | phox-like domain containing protein [Pythium insidiosum]                  | 75.59  | 30.87  | 29.11  |
| p-cluster346777 | KAF1321113.1   | hypothetical protein FI667_g12129, partial [Globisporangium splendens]    | 31.34  | 71.43  | 5.71   |

|                 |                |                                                                                                           |       |        |       |
|-----------------|----------------|-----------------------------------------------------------------------------------------------------------|-------|--------|-------|
| p-cluster346852 | GAY03291.1     | phosphoethanolamine N-methyltransferase, putative [Pythium insidiosum]                                    | 63.74 | 82.85  | 8.42  |
| p-cluster346898 | ETO64182.1     | hypothetical protein F444_18275, partial [Phytophthora parasitica P1976]                                  | 38.70 | 80.74  | 82.18 |
| p-cluster347074 | RLN73590.1     | hypothetical protein BBJ28_00023107 [Nothophytophthora sp. Chile5]                                        | 48.89 | 33.71  | 9.50  |
| p-cluster347306 | KAF1324561.1   | Udp-n-acetylglucosamine--peptide n-acetylglucosaminyltransferase sec, partial [Globisporangium splendens] | 51.69 | 100.00 | 8.69  |
| p-cluster347402 | GAX97649.1     | charged multivesicular body protein 2a [Pythium insidiosum]                                               | 96.51 | 93.48  | 36.60 |
| p-cluster347515 | KOO35698.1     | hypothetical protein CtoB_016172, partial [Chrysosporium tobinii]                                         | 30.91 | 52.03  | 50.19 |
| p-cluster347583 | GAX95033.1     | TRAF3-interacting protein, putative [Pythium insidiosum]                                                  | 91.71 | 57.37  | 24.01 |
| p-cluster347937 | XP_008610175.1 | hypothetical protein SDRG_06189 [Saprolegnia diclina VS20]                                                | 44.40 | 100.00 | 36.89 |
| p-cluster348091 | GAX92992.1     | RNA polymerase-associated protein CTR9 [Pythium insidiosum]                                               | 60.87 | 100.00 | 7.72  |
| p-cluster348308 | TMW66234.1     | hypothetical protein Poli38472_003999 [Pythium oligandrum]                                                | 37.34 | 55.54  | 20.92 |
| p-cluster348325 | RQM27595.1     | hypothetical protein B5M09_010155 [Aphanomyces astaci]                                                    | 38.10 | 79.62  | 96.04 |
| p-cluster348433 | TMW60355.1     | hypothetical protein Poli38472_000397 [Pythium oligandrum]                                                | 43.94 | 41.18  | 24.66 |
| p-cluster348474 | GAX98228.1     | CMGC/MAPK protein kinase [Pythium insidiosum]                                                             | 81.59 | 100.00 | 28.29 |
| p-cluster348826 | KAF1328042.1   | hypothetical protein FI667_g7374, partial [Globisporangium splendens]                                     | 56.41 | 37.32  | 45.22 |
| p-cluster349066 | TMW60484.1     | hypothetical protein Poli38472_000526 [Pythium oligandrum]                                                | 38.04 | 93.88  | 27.76 |
| p-cluster349221 | GAX95191.1     | glycosyltransferase-like domain-containing protein 1-like protein [Pythium insidiosum]                    | 81.53 | 94.37  | 23.13 |
| p-cluster349291 | GAX97319.1     | V-type proton ATPase subunit H, putative [Pythium insidiosum]                                             | 68.24 | 100.00 | 25.49 |
| p-cluster349333 | GAY04039.1     | CAMKK protein kinase [Pythium insidiosum]                                                                 | 67.68 | 94.29  | 5.36  |
| p-cluster349411 | TMW55887.1     | hypothetical protein Poli38472_008535 [Pythium oligandrum]                                                | 60.63 | 62.82  | 17.91 |
| p-cluster349533 | TMW56366.1     | hypothetical protein Poli38472_006376 [Pythium oligandrum]                                                | 31.94 | 98.66  | 37.52 |
| p-cluster349931 | TMW66876.1     | hypothetical protein Poli38472_011992 [Pythium oligandrum]                                                | 32.99 | 77.85  | 27.25 |
| p-cluster350032 | TMW66819.1     | hypothetical protein Poli38472_011935 [Pythium oligandrum]                                                | 40.28 | 85.57  | 10.35 |
| p-cluster350070 | GAY00967.1     | DNA-binding protein, 42 kDa [Pythium insidiosum]                                                          | 94.12 | 60.49  | 12.91 |
| p-cluster350375 | GAY02207.1     | STE/STE11 protein kinase [Pythium insidiosum]                                                             | 84.00 | 100.00 | 13.66 |
| p-cluster350388 | GAY06700.1     | replication protein [Pythium insidiosum]                                                                  | 74.45 | 95.13  | 50.13 |
| p-cluster350419 | TMW69151.1     | hypothetical protein Poli38472_001307 [Pythium oligandrum]                                                | 36.21 | 53.43  | 46.70 |
| p-cluster350818 | TMW64732.1     | hypothetical protein Poli38472_011612 [Pythium oligandrum]                                                | 32.49 | 92.31  | 13.35 |
| p-cluster351204 | GAX92617.1     | trans-acting enoyl reductase, putative [Pythium insidiosum]                                               | 61.19 | 83.75  | 5.35  |
| p-cluster351384 | GAX96101.1     | glucosidase, putative, partial [Pythium insidiosum]                                                       | 77.91 | 78.10  | 6.25  |
| p-cluster351546 | QTZ83151.1     | MAG: capsid protein [Emberiza pusilla parvo-like hybrid virus]                                            | 38.06 | 86.21  | 39.62 |
| p-cluster351564 | RLN86915.1     | hypothetical protein BBJ28_00007391 [Nothophytophthora sp. Chile5]                                        | 32.30 | 99.28  | 14.35 |
| p-cluster351623 | GAX94671.1     | HECT ubiquitin ligase, putative [Pythium insidiosum]                                                      | 99.54 | 100.00 | 20.44 |
| p-cluster352882 | GAX92657.1     | serine protease family S33, putative [Pythium insidiosum]                                                 | 82.35 | 100.00 | 5.06  |
| p-cluster353116 | TMW68157.1     | hypothetical protein Poli38472_007829 [Pythium oligandrum]                                                | 57.03 | 100.00 | 18.02 |
| p-cluster353238 | GAX92992.1     | RNA polymerase-associated protein CTR9 [Pythium insidiosum]                                               | 98.45 | 96.99  | 11.45 |
| p-cluster353277 | GAX97677.1     | eukaryotic translation initiation factor 5B [Pythium insidiosum]                                          | 82.79 | 100.00 | 12.63 |
| p-cluster353290 | KAG3117558.1   | hypothetical protein PI125_g3650 [Phytophthora idaei]                                                     | 60.34 | 92.06  | 18.67 |
| p-cluster353339 | TMW60707.1     | hypothetical protein Poli38472_000749 [Pythium oligandrum]                                                | 35.61 | 99.20  | 5.29  |
| p-cluster353831 | TMW64805.1     | hypothetical protein Poli38472_008972 [Pythium oligandrum]                                                | 32.40 | 70.23  | 34.96 |
| p-cluster354193 | TMW58892.1     | hypothetical protein Poli38472_007037 [Pythium oligandrum]                                                | 55.63 | 29.05  | 91.95 |
| p-cluster354370 | TMW64557.1     | hypothetical protein Poli38472_011437 [Pythium oligandrum]                                                | 32.65 | 61.46  | 58.44 |
| p-cluster354979 | GAX97439.1     | vacuolar protein sortingassociated protein VTA1 put, partial [Pythium insidiosum]                         | 57.39 | 100.00 | 28.30 |
| p-cluster354991 | TMW66084.1     | hypothetical protein Poli38472_003849 [Pythium oligandrum]                                                | 60.38 | 20.62  | 3.97  |
| p-cluster355298 | GAY01252.1     | transmembrane protein, putative [Pythium insidiosum]                                                      | 76.00 | 21.61  | 39.11 |
| p-cluster356455 | KAF1321521.1   | Tkl protein kinase, partial [Globisporangium splendens]                                                   | 43.32 | 39.07  | 47.09 |
| p-cluster357064 | GAX98664.1     | transmembrane protein, putative [Pythium insidiosum]                                                      | 75.51 | 56.65  | 22.72 |
| p-cluster357191 | RLN74125.1     | hypothetical protein BBJ28_00013297 [Nothophytophthora sp. Chile5]                                        | 74.07 | 40.60  | 2.51  |
| p-cluster357293 | KAG4245600.1   | hypothetical protein PC116_g6624 [Phytophthora cactorum]                                                  | 43.05 | 47.71  | 99.34 |
| p-cluster357403 | TMW62295.1     | hypothetical protein Poli38472_009788 [Pythium oligandrum]                                                | 37.74 | 67.86  | 37.69 |
| p-cluster358351 | TMW63799.1     | hypothetical protein Poli38472_002740 [Pythium oligandrum]                                                | 68.96 | 25.53  | 55.90 |
| p-cluster358605 | GAY00742.1     | epsin-like protein [Pythium insidiosum]                                                                   | 95.89 | 48.03  | 27.65 |
| p-cluster358701 | TMW68414.1     | hypothetical protein Poli38472_005882 [Pythium oligandrum]                                                | 47.52 | 78.50  | 72.88 |
| p-cluster359248 | KAG3082942.1   | hypothetical protein PI125_g19859 [Phytophthora idaei]                                                    | 52.48 | 25.00  | 14.22 |
| p-cluster360110 | GAY00538.1     | A/G-specific adenine glycosylase [Pythium insidiosum]                                                     | 61.14 | 100.00 | 15.12 |
| p-cluster360187 | GAX96588.1     | multiple inositol polyphosphate phosphatase, putative [Pythium insidiosum]                                | 77.03 | 8.85   | 29.03 |
| p-cluster360419 | TMW59272.1     | hypothetical protein Poli38472_004341 [Pythium oligandrum]                                                | 41.73 | 80.00  | 50.19 |
| p-cluster360542 | TMW65290.1     | hypothetical protein Poli38472_007932 [Pythium oligandrum]                                                | 50.34 | 47.58  | 66.67 |
| p-cluster360689 | TMW57977.1     | hypothetical protein Poli38472_013451 [Pythium oligandrum]                                                | 59.17 | 33.07  | 47.18 |
| p-cluster361036 | GAX99420.1     | catalase [Pythium insidiosum]                                                                             | 89.16 | 30.62  | 82.63 |
| p-cluster361207 | TMW63131.1     | hypothetical protein Poli38472_002072 [Pythium oligandrum]                                                | 81.08 | 30.08  | 10.88 |
| p-cluster361249 | XP_009828885.1 | TKL protein kinase [Aphanomyces astaci]                                                                   | 32.36 | 72.42  | 73.44 |
| p-cluster361406 | TMW69271.1     | hypothetical protein Poli38472_001427 [Pythium oligandrum]                                                | 78.01 | 45.19  | 70.85 |

|                 |                |                                                                                      |       |        |       |
|-----------------|----------------|--------------------------------------------------------------------------------------|-------|--------|-------|
| p-cluster361421 | GAY00528.1     | H/ACA ribonucleoprotein complex non-core subunit NAF1, putative [Pythium insidiosum] | 76.96 | 74.12  | 69.96 |
| p-cluster361526 | KAE8909473.1   | hypothetical protein PF003_g6601 [Phytophthora fragariae]                            | 31.58 | 50.76  | 43.23 |
| p-cluster362100 | TMW62245.1     | hypothetical protein Poli38472_009738 [Pythium oligandrum]                           | 39.27 | 27.80  | 35.93 |
| p-cluster362110 | TMW56766.1     | hypothetical protein Poli38472_006776 [Pythium oligandrum]                           | 34.30 | 77.66  | 15.59 |
| p-cluster362159 | GAY01449.1     | splicing factor 3 subunit putative [Pythium insidiosum]                              | 97.98 | 100.00 | 27.47 |
| p-cluster362189 | TMW65373.1     | hypothetical protein Poli38472_008015 [Pythium oligandrum]                           | 42.64 | 40.09  | 68.64 |
| p-cluster362884 | TMW65751.1     | hypothetical protein Poli38472_008393 [Pythium oligandrum]                           | 32.76 | 54.65  | 20.95 |
| p-cluster363028 | TMW64170.1     | hypothetical protein Poli38472_014287 [Pythium oligandrum]                           | 55.52 | 41.90  | 51.29 |
| p-cluster363106 | TMW59425.1     | hypothetical protein Poli38472_004494 [Pythium oligandrum]                           | 58.46 | 57.55  | 10.62 |
| p-cluster363826 | TMW62713.1     | hypothetical protein Poli38472_005331 [Pythium oligandrum]                           | 33.74 | 44.86  | 34.24 |
| p-cluster364131 | KAF6734811.1   | Disks large-like protein 5 [Oryzias melastigma]                                      | 47.45 | 52.23  | 5.13  |
| p-cluster364264 | TMW64200.1     | hypothetical protein Poli38472_012822 [Pythium oligandrum]                           | 45.54 | 96.84  | 24.13 |
| p-cluster364544 | TMW61250.1     | hypothetical protein Poli38472_013713 [Pythium oligandrum]                           | 59.75 | 49.38  | 46.82 |
| p-cluster364627 | TMW69703.1     | hypothetical protein Poli38472_001859 [Pythium oligandrum]                           | 42.99 | 78.31  | 52.82 |
| p-cluster364860 | GAY06760.1     | G-protein coupled receptor [Pythium insidiosum]                                      | 97.67 | 57.03  | 20.19 |
| p-cluster365027 | TMW61005.1     | hypothetical protein Poli38472_014466 [Pythium oligandrum]                           | 30.62 | 29.06  | 29.80 |
| p-cluster365325 | GAX98679.1     | transcription elongation factor SPT5, putative [Pythium insidiosum]                  | 96.65 | 100.00 | 8.26  |
| p-cluster365374 | TMW66522.1     | hypothetical protein Poli38472_004287 [Pythium oligandrum]                           | 27.96 | 86.24  | 38.54 |
| p-cluster365772 | TMW55103.1     | hypothetical protein Poli38472_013865 [Pythium oligandrum]                           | 48.51 | 92.94  | 39.78 |
| p-cluster366174 | GAX95972.1     | putative vesicle coat complex COPII subunit SEC24/subunit SFB2 [Pythium insidiosum]  | 83.50 | 81.60  | 9.35  |
| p-cluster366262 | TMW68474.1     | hypothetical protein Poli38472_005942 [Pythium oligandrum]                           | 42.16 | 54.62  | 18.33 |
| p-cluster366332 | TMW66523.1     | hypothetical protein Poli38472_004288 [Pythium oligandrum]                           | 36.42 | 75.86  | 26.32 |
| p-cluster366507 | KAE8988953.1   | hypothetical protein PR002_g21595 [Phytophthora rubi]                                | 43.86 | 39.76  | 62.86 |
| p-cluster366685 | KAF1313803.1   | G-protein coupled receptor, partial [Globisporangium splendens]                      | 55.22 | 94.37  | 11.24 |
| p-cluster366864 | OWZ19923.1     | LOW QUALITY PROTEIN: hypothetical protein PHMEG_0005748 [Phytophthora megakarya]     | 25.08 | 61.47  | 78.08 |
| p-cluster366918 | RLN72468.1     | hypothetical protein BBJ28_00025282 [Nothophytophthora sp. Chile5]                   | 50.47 | 89.78  | 32.27 |
| p-cluster367464 | GAX94254.1     | glucosidase 2 subunit beta-like protein [Pythium insidiosum]                         | 73.48 | 44.27  | 97.04 |
| p-cluster368226 | TMW64627.1     | hypothetical protein Poli38472_011507 [Pythium oligandrum]                           | 46.17 | 54.42  | 55.54 |
| p-cluster368454 | TMW58632.1     | hypothetical protein Poli38472_010191 [Pythium oligandrum]                           | 32.04 | 98.34  | 24.45 |
| p-cluster368581 | KAF1321493.1   | hypothetical protein FI667_g11940, partial [Globisporangium splendens]               | 36.32 | 69.41  | 46.62 |
| p-cluster368733 | GAX99588.1     | Axonemal Inner Arm 11 Intermediate Chain Dynein [Pythium insidiosum]                 | 98.03 | 80.42  | 27.09 |
| p-cluster369059 | TMW68012.1     | hypothetical protein Poli38472_007684 [Pythium oligandrum]                           | 67.74 | 26.88  | 52.25 |
| p-cluster369263 | POM77269.1     | hypothetical protein PHPALM_5372, partial [Phytophthora palmivora var. palmivora]    | 50.00 | 100.00 | 89.19 |
| p-cluster369266 | OQR98765.1     | hypothetical protein THRCLA_21870 [Thraustotheca clavata]                            | 25.42 | 51.32  | 48.03 |
| p-cluster369273 | TMW57385.1     | hypothetical protein Poli38472_003310 [Pythium oligandrum]                           | 41.79 | 79.14  | 23.35 |
| p-cluster369416 | XP_008869565.1 | hypothetical protein, variant 1 [Aphanomyces invadans]                               | 39.68 | 32.90  | 22.92 |
| p-cluster369588 | TMW58615.1     | hypothetical protein Poli38472_010174 [Pythium oligandrum]                           | 47.62 | 49.61  | 4.44  |
| p-cluster369976 | TMW67376.1     | hypothetical protein Poli38472_012492 [Pythium oligandrum]                           | 34.32 | 33.22  | 53.67 |
| p-cluster370221 | TMW68033.1     | hypothetical protein Poli38472_007705 [Pythium oligandrum]                           | 64.81 | 37.76  | 15.56 |
| p-cluster370356 | TMW59055.1     | hypothetical protein Poli38472_007200 [Pythium oligandrum]                           | 48.89 | 45.49  | 27.43 |
| p-cluster370407 | TMW60279.1     | hypothetical protein Poli38472_000321 [Pythium oligandrum]                           | 54.46 | 38.28  | 97.24 |
| p-cluster370785 | GAY03725.1     | ABC transporter lipid exporter ABCA1 family [Pythium insidiosum]                     | 59.26 | 75.65  | 13.59 |
| p-cluster371269 | TMW64682.1     | hypothetical protein Poli38472_011562 [Pythium oligandrum]                           | 51.00 | 87.39  | 10.92 |
| p-cluster371728 | KAE9261061.1   | hypothetical protein PF008_g32942 [Phytophthora fragariae]                           | 31.43 | 51.87  | 82.99 |
| p-cluster371864 | TMW66838.1     | hypothetical protein Poli38472_011954 [Pythium oligandrum]                           | 56.02 | 31.19  | 36.70 |
| p-cluster372203 | OWY92127.1     | hypothetical protein PHMEG_00038995 [Phytophthora megakarya]                         | 45.35 | 83.84  | 68.25 |
| p-cluster372215 | TMW69721.1     | hypothetical protein Poli38472_001877 [Pythium oligandrum]                           | 24.88 | 77.45  | 24.64 |
| p-cluster372501 | GAX92860.1     | ribosomal protein S2 [Pythium insidiosum]                                            | 81.67 | 68.24  | 21.82 |
| p-cluster372508 | KAG6964218.1   | hypothetical protein JG688_00007795 [Phytophthora aleatoria]                         | 25.85 | 40.29  | 85.23 |
| p-cluster372751 | GAX96946.1     | tartrate-resistant acid phosphatase type 5 [Pythium insidiosum]                      | 61.88 | 100.00 | 35.73 |
| p-cluster372878 | QTZ83151.1     | MAG: capsid protein [Emberiza pusilla parvo-like hybrid virus]                       | 36.65 | 39.90  | 41.24 |
| p-cluster373497 | KAG2508721.1   | hypothetical protein JM16_008306 [Phytophthora kernoviae]                            | 38.18 | 43.65  | 49.30 |
| p-cluster373513 | GAY05747.1     | replication protein [Pythium insidiosum]                                             | 46.18 | 49.21  | 50.09 |
| p-cluster373603 | TMW63958.1     | hypothetical protein Poli38472_014663 [Pythium oligandrum]                           | 47.55 | 50.72  | 73.40 |
| p-cluster373748 | KAE9090258.1   | hypothetical protein PF010_g18656 [Phytophthora fragariae]                           | 80.49 | 62.12  | 10.96 |
| p-cluster373970 | GAY05747.1     | replication protein [Pythium insidiosum]                                             | 60.00 | 49.18  | 10.50 |
| p-cluster374021 | KAE8957867.1   | hypothetical protein PR001_g31226, partial [Phytophthora rubi]                       | 30.36 | 51.04  | 67.42 |
| p-cluster374022 | ETL99743.1     | hypothetical protein L917_03449 [Phytophthora parasitica]                            | 69.57 | 55.42  | 23.12 |
| p-cluster374323 | CAF4114896.1   | unnamed protein product [Rotaria magnacalcarata]                                     | 29.95 | 49.00  | 22.47 |
| p-cluster375485 | TMW68563.1     | hypothetical protein Poli38472_006031 [Pythium oligandrum]                           | 31.53 | 98.29  | 10.73 |
| p-cluster375783 | TMW63268.1     | hypothetical protein Poli38472_002209 [Pythium oligandrum]                           | 40.23 | 80.89  | 27.73 |
| p-cluster375816 | KAG3202215.1   | hypothetical protein PC129_g23307 [Phytophthora cactorum]                            | 35.03 | 93.88  | 51.82 |

|                 |              |                                                                          |       |        |       |
|-----------------|--------------|--------------------------------------------------------------------------|-------|--------|-------|
| p-cluster376106 | KAE8958858.1 | hypothetical protein PR001_g30910 [Phytophthora rubi]                    | 63.77 | 49.64  | 16.39 |
| p-cluster377026 | KAF1316114.1 | Integrase catalytic core protein, partial [Globisporangium splendens]    | 30.38 | 91.19  | 20.40 |
| p-cluster377088 | KAF0690190.1 | hypothetical protein As57867_018319 [Aphanomyces stellatus]              | 48.08 | 74.29  | 46.22 |
| p-cluster377102 | TMW63644.1   | hypothetical protein Poli38472_002585 [Pythium oligandrum]               | 34.97 | 100.00 | 19.30 |
| p-cluster377103 | KAF1327825.1 | Breast cancer type 2 susceptibility, partial [Globisporangium splendens] | 32.32 | 61.90  | 9.47  |
| p-cluster377122 | GAY03286.1   | H/ACA ribonucleoprotein complex subunit 4 [Pythium insidiosum]           | 87.29 | 86.72  | 24.13 |
| p-cluster377453 | RMX69642.1   | hypothetical protein DD238_002237 [Peronospora effusa]                   | 92.68 | 46.86  | 13.82 |
| p-cluster377787 | GAY06760.1   | G-protein coupled receptor [Pythium insidiosum]                          | 48.68 | 82.61  | 7.04  |
| p-cluster378096 | TMW54981.1   | hypothetical protein Poli38472_014752 [Pythium oligandrum]               | 67.74 | 48.06  | 10.16 |
| p-cluster378384 | MCL2386855.1 | stalk domain-containing protein [Defluviitaleaceae bacterium]            | 60.00 | 50.00  | 6.99  |
| p-cluster378439 | KAE9362126.1 | hypothetical protein PF008_g367 [Phytophthora fragariae]                 | 51.76 | 69.83  | 44.50 |
| p-cluster378510 | KAG6584586.1 | hypothetical protein IUM83_07934 [Phytophthora cinnamomi]                | 47.85 | 95.29  | 3.60  |
| p-cluster378650 | KAE8982983.1 | hypothetical protein PR001_g23574 [Phytophthora rubi]                    | 46.00 | 86.34  | 25.30 |
| p-cluster379195 | TMW55930.1   | hypothetical protein Poli38472_008578 [Pythium oligandrum]               | 31.54 | 96.90  | 9.04  |
| p-cluster379249 | TMW59954.1   | hypothetical protein Poli38472_005023 [Pythium oligandrum]               | 52.94 | 93.33  | 17.68 |
| p-cluster379403 | BAS04780.1   | exo-1,3-beta glucanase, partial [Pythium insidiosum]                     | 76.85 | 100.00 | 14.75 |
| p-cluster379421 | GAY04117.1   | serine protease family S33, putative [Pythium insidiosum]                | 52.94 | 62.96  | 3.71  |
| p-cluster379458 | CEP01103.1   | hypothetical protein PBRA_008415 [Plasmodiophora brassicae]              | 62.86 | 76.09  | 86.42 |
| p-cluster379616 | GAX97384.1   | FAD dependent oxidoreductase [Pythium insidiosum]                        | 95.24 | 100.00 | 19.76 |
| p-cluster383523 | TMW65957.1   | hypothetical protein Poli38472_003722 [Pythium oligandrum]               | 43.33 | 100.00 | 96.75 |
| p-cluster388968 | TMW64235.1   | hypothetical protein Poli38472_012857 [Pythium oligandrum]               | 92.59 | 100.00 | 12.98 |
| p-cluster409750 | TMW56714.1   | hypothetical protein Poli38472_006724 [Pythium oligandrum]               | 47.78 | 100.00 | 9.91  |
| p-cluster461125 | KAE9309726.1 | hypothetical protein PR003_g20452 [Phytophthora rubi]                    | 50.18 | 63.07  | 48.77 |
| p-cluster463687 | TMW59540.1   | hypothetical protein Poli38472_004609 [Pythium oligandrum]               | 54.52 | 89.15  | 89.52 |
| p-cluster486426 | OQR84071.1   | hypothetical protein ACHHYP_13943 [Achlya hypogyna]                      | 32.60 | 86.20  | 83.04 |
| p-cluster496436 | TMW61321.1   | hypothetical protein Poli38472_012512 [Pythium oligandrum]               | 40.00 | 71.90  | 70.55 |
| p-cluster498223 | KAH9118114.1 | hypothetical protein AeMF1_008575, partial [Aphanomyces euteiches]       | 41.04 | 98.56  | 58.79 |
| p-cluster499434 | KAF1313151.1 | putative retroelement, partial [Globisporangium splendens]               | 77.36 | 22.65  | 2.72  |
| p-cluster500680 | KAG7388086.1 | hypothetical protein PHYBOEH_008011 [Phytophthora boehmeriae]            | 42.55 | 99.66  | 44.05 |
