# Supplementary material for: Comparative Genomic Analysis Reveals Gene Content Diversity, Phylogenomic Contour, Putative Virulence Determinants, and Potential Diagnostic Markers within Pythium insidiosum Traits
Source: MDPI journal article supplement (doi:10.3390/jof9020169), 2023-01-27
Supplement: s1 [file s1]

**Supplementary Table S1.** Summary of 166 single copy core genes present in the genomes of 10 *P. insidiosum* strains and other 5 *Pythium* species. This set of genes is used in the phylogenetic analysis. All sequences can be accessed by searching our *Pythium* Gene Table Tool (<https://202.28.6.19/cgi-bin/gt/viewer?organism=pythium&build=191128>) using the Cluster ID.

| Cluster ID      | Expected Length (bp) | Product Description                                                           |
|-----------------|----------------------|-------------------------------------------------------------------------------|
| p-cluster058321 | 13248                | Dynein heavy chain                                                            |
| p-cluster331378 | 9453                 | Pre-mrna-processing-splicing factor 8                                         |
| p-cluster356241 | 6276                 | Dna-directed rna polymerase i subunit rpa2, putative                          |
| p-cluster039728 | 4905                 | Type i inositol 3                                                             |
| p-cluster116446 | 4761                 | P-glycoprotein                                                                |
| p-cluster471970 | 4602                 | Wd domain-containing protein                                                  |
| p-cluster045117 | 4422                 | Chromatin-remodeling complex atpase chain, putative                           |
| p-cluster339836 | 4251                 | Glycoside hydrolase, family 15:p (iss)                                        |
| p-cluster279513 | 4179                 | Myosin                                                                        |
| p-cluster130998 | 4125                 | Atp-binding cassette (abc) superfamily                                        |
| p-cluster323678 | 4125                 | Rna polymerase-associated protein ctr9                                        |
| p-cluster333890 | 4098                 | Elongation factor tu gtp-binding domain-containing protein 1                  |
| p-cluster051218 | 3954                 | Sphingosine/diacylglycerol kinase-like enzyme                                 |
| p-cluster399594 | 3723                 | Alpha-glucosidase                                                             |
| p-cluster318336 | 3711                 | Argonaute4 (ago4)                                                             |
| p-cluster163438 | 3654                 | Guanylate-binding protein, n-terminal domain containing protein               |
| p-cluster206380 | 3609                 | Beta-galactosidase 5                                                          |
| p-cluster525305 | 3549                 | Isoleucine-trna ligase                                                        |
| p-cluster076910 | 3540                 | Phosphatase 2c and cyclic nucleotide-binding/kinase domain-containing protein |
| p-cluster012200 | 3465                 | Elongation factor                                                             |
| p-cluster045331 | 3441                 | Choline dehydrogenase                                                         |
| p-cluster055029 | 3426                 | Nonsense-mediated mrna decay protein                                          |
| p-cluster001065 | 3408                 | Importin                                                                      |
| p-cluster053633 | 3360                 | Exportin-t, putative                                                          |
| p-cluster195878 | 3255                 | Glucose regulated protein /bip                                                |
| p-cluster015208 | 3251                 | Membrane alanine aminopeptidase                                               |
| p-cluster346298 | 3189                 | Atp-dependent helicase                                                        |
| p-cluster317760 | 3162                 | Gamma-aminobutyric acid type b receptor subunit 2                             |
| p-cluster475259 | 3156                 | Dna replication licensing factor mcm2                                         |
| p-cluster361250 | 3090                 | Pc22g01270 protein                                                            |
| p-cluster328407 | 3042                 | Transposase                                                                   |
| p-cluster269244 | 2931                 | Croquemort-like mating protein m82                                            |
| p-cluster485873 | 2916                 | Protein kinase                                                                |
| p-cluster127561 | 2901                 | Serine protease family s33, putative                                          |
| p-cluster389477 | 2847                 | Transmembrane protein                                                         |
| p-cluster472752 | 2847                 | Rac family serine/threonine-protein kinase                                    |
| p-cluster107154 | 2844                 | Heat shock protein 101                                                        |

|                 |      |                                                             |
|-----------------|------|-------------------------------------------------------------|
| p-cluster188262 | 2835 | Beta-glucan synthesis-associated protein                    |
| p-cluster335763 | 2800 | Peptidase                                                   |
| p-cluster366428 | 2775 | Proton-dependent oligopeptide transporter (pot) family      |
| p-cluster029102 | 2667 | Ap-1 complex subunit gamma-1                                |
| p-cluster467699 | 2646 | Vacuolar protein sorting-associated protein                 |
| p-cluster324621 | 2592 | Filamentous muscle protein titin - homo sapiens             |
| p-cluster216398 | 2562 | Cytochrome p450                                             |
| p-cluster221544 | 2532 | Hypothetical protein                                        |
| p-cluster343472 | 2532 | Glucose transporter, putative                               |
| p-cluster064043 | 2496 | Monoglyceride lipase                                        |
| p-cluster428614 | 2481 | Multicopper oxidase, types 2 and 3                          |
| p-cluster204602 | 2478 | Transmembrane protein                                       |
| p-cluster225249 | 2475 | Lactoylglutathione lyase                                    |
| p-cluster040513 | 2439 | Hect e3 ubiquitin ligase                                    |
| p-cluster209228 | 2412 | Seryl-trna synthetase                                       |
| p-cluster318916 | 2409 | Abc transporter b family member 2                           |
| p-cluster150334 | 2406 | Myosin                                                      |
| p-cluster214680 | 2398 | Gk16278                                                     |
| p-cluster172856 | 2349 | Flagellar outer dynein arm-docking complex protein 1        |
| p-cluster261793 | 2310 | Dynein intermediate chain 2                                 |
| p-cluster464442 | 2307 | Serine protease family s15                                  |
| p-cluster015876 | 2277 | Ars-binding protein                                         |
| p-cluster055792 | 2277 | Trna wybutosine-synthesizing protein                        |
| p-cluster052259 | 2211 | Mitogen-activated protein kinase mmk1                       |
| p-cluster474738 | 2204 | Dynamin-2                                                   |
| p-cluster468363 | 2172 | Regulator of g-protein signalling 13                        |
| p-cluster465546 | 2166 | Calcineurin-like phosphoesterase                            |
| p-cluster200538 | 2157 | Manganese lipoxxygenase                                     |
| p-cluster172193 | 2130 | Eukaryotic translation initiation factor 2-alpha kinase     |
| p-cluster048812 | 2100 | Bifunctional arginine demethylase and lysyl-hydroxylase psr |
| p-cluster478543 | 2043 | Dna repair protein rada                                     |
| p-cluster491652 | 1983 | Atp-dependent dna helicase                                  |
| p-cluster482351 | 1971 | 2-isopropylmalate synthase                                  |
| p-cluster468864 | 1957 | Cystathionine beta-lyase                                    |
| p-cluster063775 | 1955 | Cell 5a endo-1,4-betaglucanase                              |
| p-cluster035708 | 1947 | Glycosyltransferase protein                                 |
| p-cluster471444 | 1941 | Succinate dehydrogenase                                     |
| p-cluster049548 | 1926 | Folate-biopterin transporter (fbt) family                   |
| p-cluster263090 | 1917 | Acyltransferase family                                      |
| p-cluster456928 | 1908 | Guanine nucleotide-binding protein-like 3                   |
| p-cluster202210 | 1857 | Ppat5                                                       |
| p-cluster044367 | 1851 | Aspartyl-trna synthetase                                    |
| p-cluster083996 | 1848 | Lipoprotein                                                 |
| p-cluster314653 | 1836 | Mitogen-activated protein kinase                            |
| p-cluster480091 | 1818 | Aldehyde dehydrogenase family 7 member a1                   |

|                 |      |                                                                       |
|-----------------|------|-----------------------------------------------------------------------|
| p-cluster284283 | 1791 | Glycoside hydrolase                                                   |
| p-cluster363995 | 1791 | Conserved domain protein                                              |
| p-cluster521855 | 1776 | Dihydroxyacetone kinase                                               |
| p-cluster032512 | 1760 | Serine hydroxymethyltransferase, mitochondrial precursor              |
| p-cluster078738 | 1752 | Gtp-binding protein                                                   |
| p-cluster448144 | 1749 | Tubulin epsilon chain                                                 |
| p-cluster456232 | 1746 | Protein transporter sec61 subunit alpha                               |
| p-cluster098646 | 1716 | Protein disulfide-isomerase                                           |
| p-cluster156309 | 1701 | Apopolysialoglycoprotein                                              |
| p-cluster527580 | 1701 | Ketol-acid reductoisomerase                                           |
| p-cluster209791 | 1698 | Diaminopimelate decarboxylase                                         |
| p-cluster454427 | 1695 | Cysteine protease family c01a                                         |
| p-cluster216275 | 1647 | Methyltransfer with n-terminal ankyrin repeats                        |
| p-cluster093883 | 1620 | Endoplasmic oxidoreductin                                             |
| p-cluster464180 | 1617 | Carbohydrate-binding protein                                          |
| p-cluster083707 | 1615 | Protein arginine n-methyltransferase 1                                |
| p-cluster537893 | 1611 | Myosin protein                                                        |
| p-cluster281601 | 1590 | Aspartyl protease family a22b, putative                               |
| p-cluster244249 | 1589 | Atpase                                                                |
| p-cluster088343 | 1578 | Methionine aminopeptidase                                             |
| p-cluster472207 | 1578 | Rio kinase                                                            |
| p-cluster084750 | 1566 | Putative glycosyl hydrolase family 7 protein                          |
| p-cluster363486 | 1545 | Chaperone protein dnaj                                                |
| p-cluster474794 | 1495 | Dolichyl-diphosphooligosaccharide-protein glycosyltransferase subunit |
| p-cluster024898 | 1494 | H/aca ribonucleoprotein complex subunit 4                             |
| p-cluster066675 | 1491 | Alanine aminotransferase 2                                            |
| p-cluster060842 | 1488 | Hypothetical protein                                                  |
| p-cluster007982 | 1470 | Mitochondrial carrier (bou s-adenosylmethionine carrier)              |
| p-cluster144037 | 1461 | Hypothetical protein                                                  |
| p-cluster238286 | 1461 | Rcg36077                                                              |
| p-cluster494057 | 1458 | Ruvb-like dna helicase tip49b                                         |
| p-cluster533270 | 1424 | Dtdp-glucose 4,6-dehydratase, partial                                 |
| p-cluster336520 | 1413 | Ring finger protein 2                                                 |
| p-cluster061982 | 1374 | Secreted protein                                                      |
| p-cluster221716 | 1371 | Trna (guanine-n(1)-)-methyltransferase                                |
| p-cluster050283 | 1368 | Elmo domain-containing protein 1                                      |
| p-cluster057388 | 1299 | Neuroguidin-like protein                                              |
| p-cluster040839 | 1278 | Gpi-anchored serine rich tenascin-like glycoprotein                   |
| p-cluster058644 | 1272 | Heat shock protein 40 like protein putative                           |
| p-cluster382712 | 1257 | Aquaporin-9-like protein                                              |
| p-cluster043843 | 1224 | Hsftype dnabinding protein putative                                   |
| p-cluster070734 | 1221 | Rxlr-like protein                                                     |
| p-cluster142396 | 1194 | Abc transporter a family member 1                                     |
| p-cluster106683 | 1155 | Zinc (zn2)-iron (fe2) permease (zip) family                           |
| p-cluster325048 | 1155 | Cell cycle checkpoint protein hrad1                                   |

|                 |      |                                                                                |
|-----------------|------|--------------------------------------------------------------------------------|
| p-cluster382026 | 1147 | Replication factor c subunit 4                                                 |
| p-cluster052799 | 1146 | Sbds family rna metabolism protein                                             |
| p-cluster474914 | 1143 | Flagellar associated protein                                                   |
| p-cluster387232 | 1140 | Alcohol dehydrogenase                                                          |
| p-cluster038257 | 1128 | Splicing factor spf30                                                          |
| p-cluster058602 | 1119 | Ribosomal rna methyltransferase                                                |
| p-cluster460559 | 1098 | Wd domain-containing protein, putative                                         |
| p-cluster055760 | 1068 | G protein alpha subunit                                                        |
| p-cluster423472 | 1056 | Mitochondrial carrier (mc) family                                              |
| p-cluster334604 | 1038 | Sulfate permease (sulp) family                                                 |
| p-cluster236500 | 1023 | Nitrilase/cyanide hydratase and apolipo protein n-acyltransferase-like protein |
| p-cluster297716 | 1020 | Atp10 protein                                                                  |
| p-cluster043368 | 994  | 14-3-3 protein epsilon                                                         |
| p-cluster486277 | 987  | Phytanoyl-coa dioxygenase domain-containing protein, putative                  |
| p-cluster514879 | 987  | Protein containing a histone methylation dot1 motif                            |
| p-cluster059281 | 960  | Proteasome subunit beta, putative                                              |
| p-cluster048080 | 912  | Hypothetical protein                                                           |
| p-cluster055631 | 906  | Phosphoglycerate mutase                                                        |
| p-cluster262726 | 876  | Hypothetical protein                                                           |
| p-cluster340750 | 834  | Nucleoside diphosphate kinase                                                  |
| p-cluster179849 | 831  | An-nup2 nuclear pore complex protein (eurofung)                                |
| p-cluster072961 | 830  | Bromodomain containing protein                                                 |
| p-cluster045576 | 828  | Start domain containing protein                                                |
| p-cluster045120 | 810  | Scp-like extracellular protein                                                 |
| p-cluster028519 | 789  | 40s ribosomal protein s2                                                       |
| p-cluster456633 | 756  | Electron transfer flavoprotein subunit beta                                    |
| p-cluster539586 | 755  | 60s ribosomal protein l10                                                      |
| p-cluster227024 | 714  | Nucleoredoxin                                                                  |
| p-cluster005056 | 669  | 60s ribosomal protein l12                                                      |
| p-cluster459791 | 660  | Hypothetical protein                                                           |
| p-cluster055734 | 624  | Rdgb/ham1 family non-canonical purine ntp pyrophosphatase                      |
| p-cluster238070 | 621  | Hypothetical protein                                                           |
| p-cluster102792 | 588  | Hypothetical protein                                                           |
| p-cluster473236 | 555  | Nop16                                                                          |
| p-cluster042208 | 543  | 60s ribosome subunit biogenesis protein nip7                                   |
| p-cluster476665 | 522  | Prefoldin subunit                                                              |
| p-cluster041842 | 498  | Hypothetical protein                                                           |
| p-cluster472019 | 451  | Dynein light chain flagellar outer arm                                         |
| p-cluster540466 | 397  | 13 kda ribonucleoprotein-associated protein                                    |
