# Supplementary material for: Comparative Genomic Analysis Reveals Gene Content Diversity, Phylogenomic Contour, Putative Virulence Determinants, and Potential Diagnostic Markers within Pythium insidiosum Traits
Source: MDPI journal article supplement (doi:10.3390/jof9020169), 2023-01-27
Supplement: s1 [file s1]

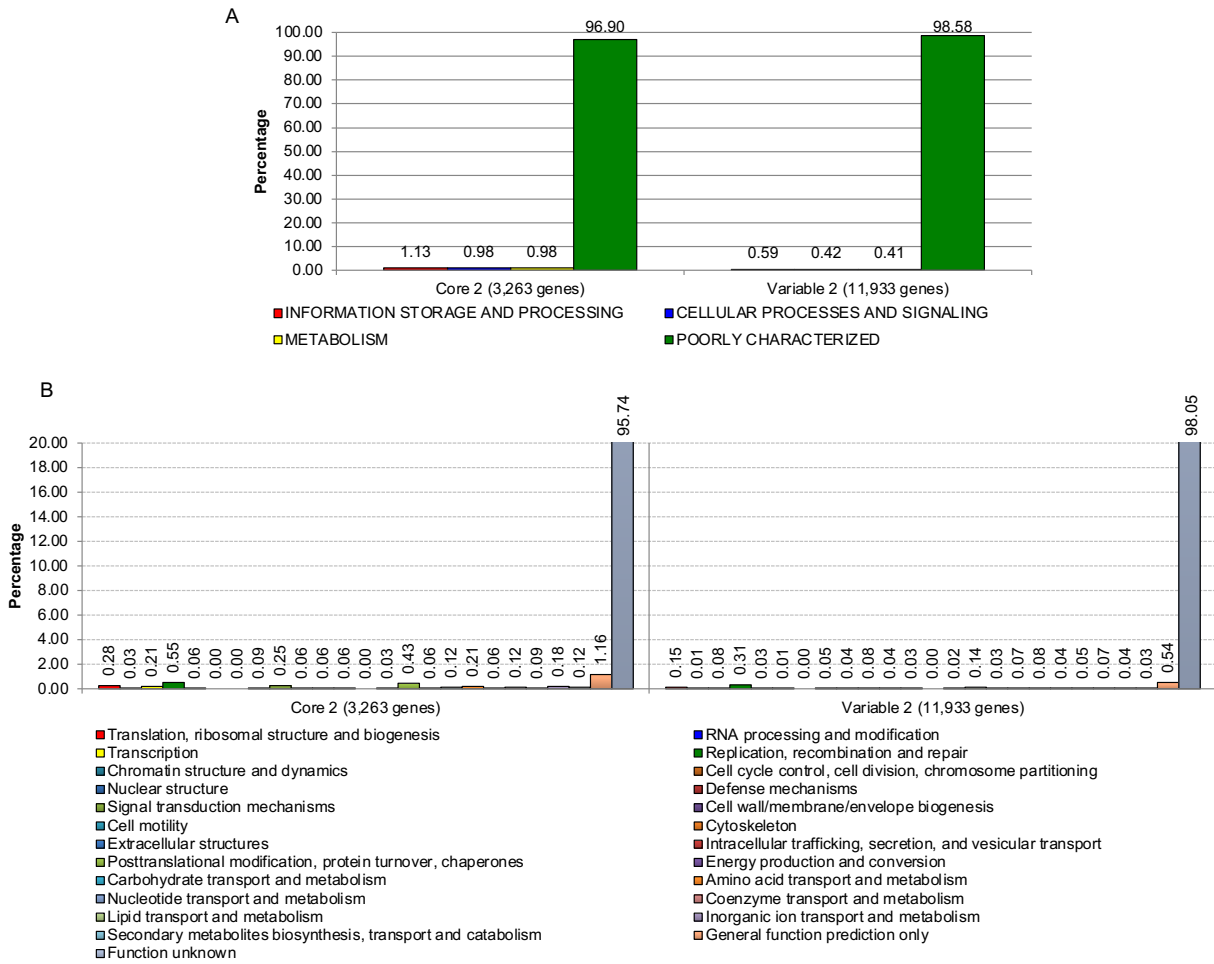

**Supplementary Figure S1.** Functional classification of Core 2 and Variable 2 genes using Clusters of Orthologous Groups (COG) according to (A) Superfunctional and (B) Functional categories.

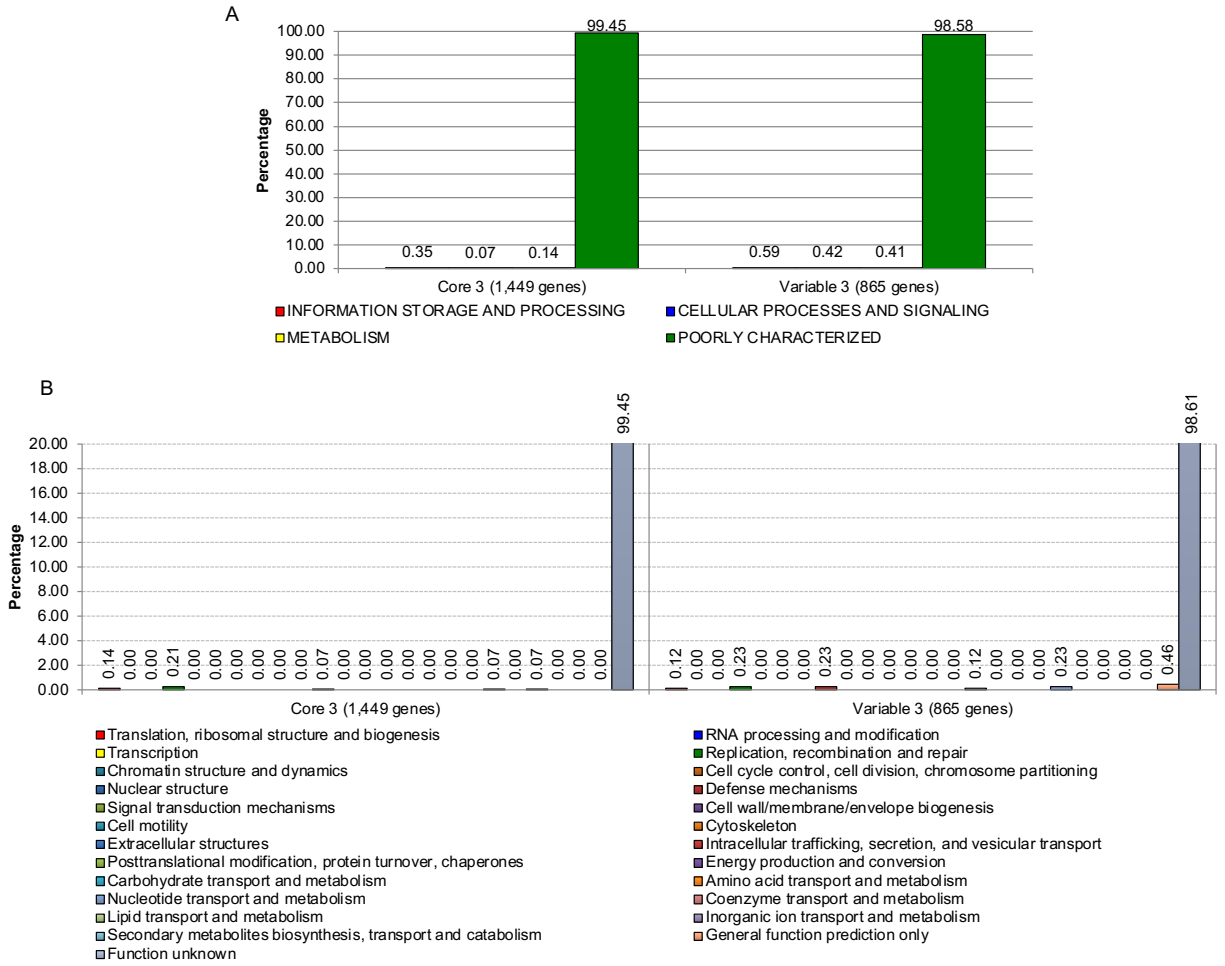

**Supplementary Figure S2.** Functional classification of Core 3 and Variable 3 genes using Clusters of Orthologous Groups (COG) according to (A) Superfunctional and (B) Functional categories.



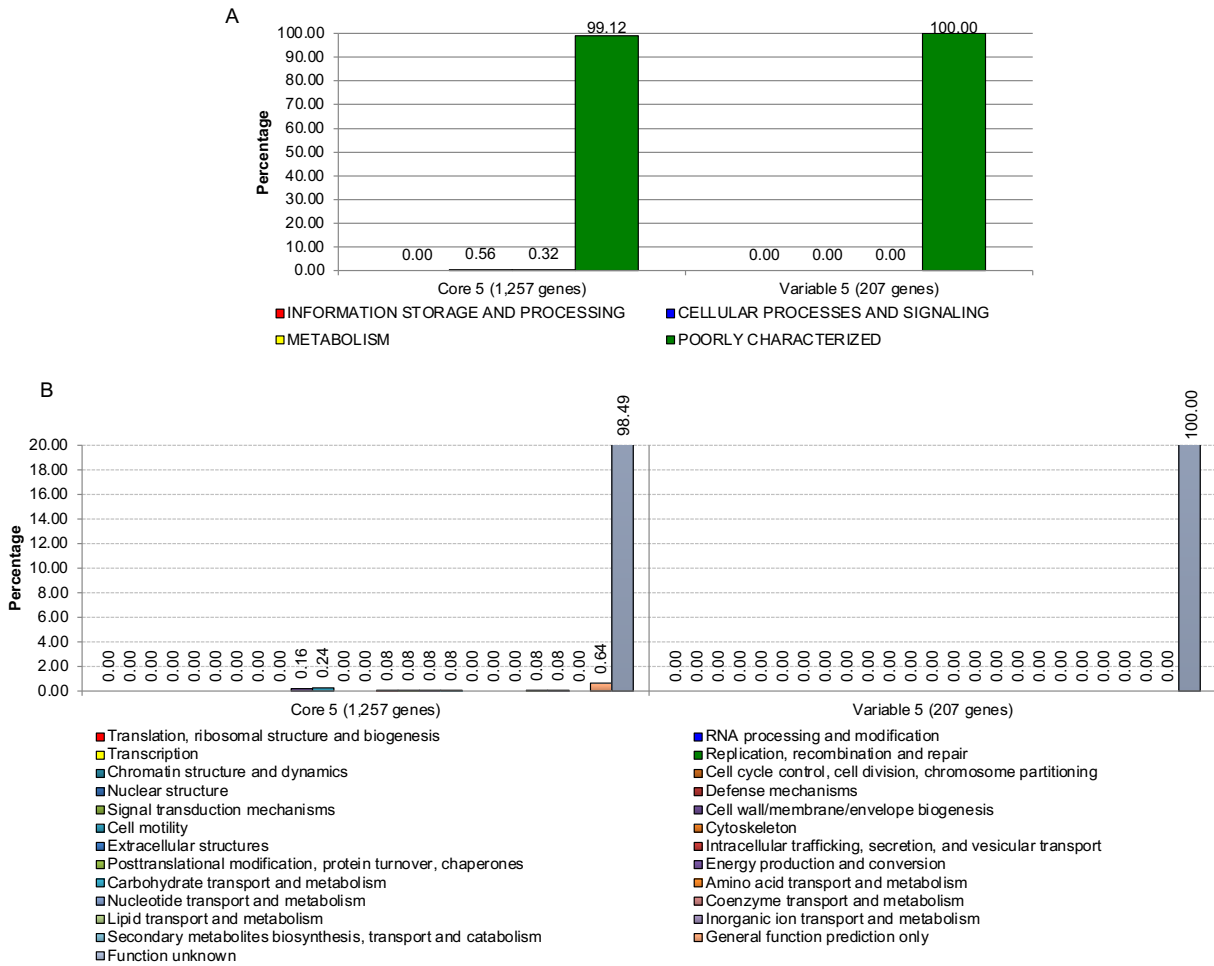

**Supplementary Figure S4.** Functional classification of Core 5 and Variable 5 genes using Clusters of Orthologous Groups (COG) according to (A) Superfunctional and (B) Functional categories.
