# Supplementary material for: Comparative Genomic Analysis Reveals Gene Content Diversity, Phylogenomic Contour, Putative Virulence Determinants, and Potential Diagnostic Markers within Pythium insidiosum Traits
Source: MDPI journal article supplement (doi:10.3390/jof9020169), 2023-01-27
Supplement: s1 [file s1]

**Supplementary Table S3.** BLAST search hits of the *P. insidiosum*-specific Core 2 gene-translated proteins against the MvirDB database.

| Query gene ID   | Hit ID     | Hit Description [Organism]                                                  | Alignment Sequence Identity (%) | Query Alignment Coverage (%) | Hit Alignment Coverage (%) |
|-----------------|------------|-----------------------------------------------------------------------------|---------------------------------|------------------------------|----------------------------|
| p-cluster315039 | VFID 12058 | Gamma-glutamyl phosphate reductase                                          | 35.84                           | 23.09                        | 98.79                      |
| p-cluster324836 | VFID 13367 | leucine-rich repeat-containing protein [Salmonella typhimurium]             | 40.00                           | 6.80                         | 10.72                      |
| p-cluster293156 | VFID 13703 | unknown [Shigella flexneri]                                                 | 24.31                           | 35.17                        | 93.89                      |
| p-cluster285703 | VFID 13899 | hypothetical protein [Escherichia coli]                                     | 37.65                           | 19.00                        | 7.17                       |
| p-cluster283019 | VFID 14152 | serine/threonine protein kinase PpkA [Pseudomonas aeruginosa]               | 31.80                           | 20.02                        | 19.96                      |
| p-cluster330978 | VFID 15128 | ClpB protein                                                                | 55.85                           | 45.51                        | 80.68                      |
| p-cluster204558 | VFID 15145 | Thioredoxin                                                                 | 31.94                           | 13.91                        | 65.42                      |
| p-cluster227399 | VFID 15950 | cell surface protein [Bacteroides thetaiotaomicron]                         | 37.25                           | 12.78                        | 22.35                      |
| p-cluster204852 | VFID 15953 | hypothetical protein BT_2630 [Bacteroides thetaiotaomicron]                 | 29.64                           | 27.62                        | 91.77                      |
| p-cluster216792 | VFID 18169 | WD-40 repeat-containing protein [Nostoc sp.]                                | 25.32                           | 89.06                        | 18.74                      |
| p-cluster356455 | VFID 19118 | protein kinase-like protein [Streptomyces coelicolor]                       | 29.74                           | 31.03                        | 30.97                      |
| p-cluster205114 | VFID 20214 | protein kinase [Salmonella enterica]                                        | 33.33                           | 9.97                         | 26.33                      |
| p-cluster233975 | VFID 20412 | putative dehydrogenase [Salmonella enterica]                                | 25.37                           | 10.49                        | 54.08                      |
| p-cluster337826 | VFID 20578 | seryl-tRNA synthetase [Salmonella enterica]                                 | 34.41                           | 35.28                        | 92.33                      |
| p-cluster207977 | VFID 20579 | recombination factor protein RarA [Salmonella enterica]                     | 24.17                           | 56.34                        | 45.19                      |
| p-cluster235704 | VFID 23251 | putative trimethoprim resistance dihydrofolate reductase [Escherichia coli] | 34.27                           | 11.34                        | 89.07                      |
| p-cluster246548 | VFID 24337 | multidrug efflux protein [Vibrio vulnificus]                                | 26.19                           | 32.09                        | 98.90                      |
| p-cluster318952 | VFID 2457  | IgA-specific serine endopeptidase [Neisseria meningitidis]                  | 27.01                           | 1.99                         | 9.59                       |
| p-cluster321022 | VFID 25936 | alpha-latrotoxin precursor [Latrodectus tredecimguttatus]                   | 21.75                           | 13.21                        | 18.99                      |
| p-cluster277547 | VFID 26375 | thrombospondin related adhesive protein [Cryptosporidium parvum]            | 27.34                           | 19.59                        | 40.61                      |
| p-cluster314500 | VFID 26400 | cGMP dependent protein kinase [Toxoplasma gondii]                           | 33.19                           | 26.33                        | 22.64                      |
| p-cluster249109 | VFID 26400 | cGMP dependent protein kinase [Toxoplasma gondii]                           | 27.65                           | 13.77                        | 24.14                      |
| p-cluster305995 | VFID 26447 | heat shock protein 70 [Toxoplasma gondii]                                   | 91.18                           | 18.28                        | 5.10                       |
| p-cluster361036 | VFID 26459 | Peroxisomal catalase                                                        | 44.16                           | 28.93                        | 84.66                      |
| p-cluster230530 | VFID 26470 | cGMP-dependent protein kinase [Eimeria tenella]                             | 36.36                           | 19.10                        | 5.48                       |
| p-cluster371864 | VFID 26470 | cGMP-dependent protein kinase [Eimeria tenella]                             | 34.26                           | 17.82                        | 9.97                       |
| p-cluster282404 | VFID 26470 | cGMP-dependent protein kinase [Eimeria tenella]                             | 31.88                           | 27.63                        | 20.54                      |
| p-cluster317812 | VFID 26599 | 85 kDa merozoite protein [Babesia bovis]                                    | 31.70                           | 32.95                        | 41.44                      |
| p-cluster324929 | VFID 26605 | CTRP [Plasmodium falciparum]                                                | 38.71                           | 11.97                        | 2.89                       |
| p-cluster309322 | VFID 26605 | CTRP [Plasmodium falciparum]                                                | 33.33                           | 35.06                        | 2.46                       |
| p-cluster326349 | VFID 26643 | reticulocyte binding protein 2 homolog a [Plasmodium falciparum]            | 38.58                           | 8.84                         | 3.90                       |
| p-cluster293767 | VFID 26643 | reticulocyte binding protein 2 homolog a [Plasmodium falciparum]            | 31.48                           | 39.75                        | 4.86                       |
| p-cluster249718 | VFID 26643 | reticulocyte binding protein 2 homolog a [Plasmodium falciparum]            | 25.61                           | 25.31                        | 2.62                       |
| p-cluster350032 | VFID 26643 | reticulocyte binding protein 2 homolog a [Plasmodium falciparum]            | 24.44                           | 35.57                        | 5.34                       |
| p-cluster245167 | VFID 26643 | reticulocyte binding protein 2 homolog a [Plasmodium falciparum]            | 21.67                           | 59.73                        | 5.34                       |
| p-cluster233915 | VFID 27170 | cathepsin B-like cysteine protease [Trypanosoma brucei]                     | 32.98                           | 30.96                        | 77.94                      |
| p-cluster321529 | VFID 27172 | acidocalcisomal pyrophosphatase [Trypanosoma brucei]                        | 39.44                           | 23.06                        | 81.64                      |
| p-cluster252457 | VFID 27247 | trans-sialidase [Trypanosoma cruzi]                                         | 27.03                           | 30.18                        | 23.65                      |

|                 |            |                                                                       |       |       |       |
|-----------------|------------|-----------------------------------------------------------------------|-------|-------|-------|
| p-cluster280772 | VFID 27786 | trans-sialidase [Trypanosoma cruzi]                                   | 38.33 | 48.17 | 23.09 |
| p-cluster361406 | VFID 27998 | small GTPase Rab7A [Entamoeba histolytica]                            | 31.93 | 37.18 | 56.80 |
| p-cluster319705 | VFID 27999 | EhRab7B protein [Entamoeba histolytica]                               | 34.66 | 16.72 | 85.02 |
| p-cluster163192 | VFID 28596 | Mitogen-activated protein kinase 13                                   | 43.86 | 13.73 | 15.62 |
| p-cluster233538 | VFID 28596 | Mitogen-activated protein kinase 13                                   | 30.96 | 19.70 | 90.96 |
| p-cluster321398 | VFID 30479 | Outer membrane protein yopM                                           | 27.76 | 78.27 | 66.50 |
| p-cluster331544 | VFID 30732 | Calglandulin                                                          | 30.22 | 22.17 | 83.97 |
| p-cluster358351 | VFID 6246  | CMP6L                                                                 | 22.17 | 12.83 | 84.81 |
| p-cluster338261 | VFID 6873  | AMV167                                                                | 86.84 | 6.67  | 93.83 |
| p-cluster328123 | VFID 7458  | putative chaperone DnAJ [Bacteroides thetaiotaomicron]                | 50.94 | 14.64 | 16.51 |
| p-cluster239806 | VFID 7458  | putative chaperone DnAJ [Bacteroides thetaiotaomicron]                | 33.78 | 14.66 | 22.43 |
| p-cluster278911 | VFID 7841  | filamentous hemagglutinin/adhesin [Bordetella pertussis]              | 29.89 | 44.71 | 4.74  |
| p-cluster346852 | VFID 7841  | filamentous hemagglutinin/adhesin [Bordetella pertussis]              | 27.44 | 40.45 | 4.57  |
| p-cluster288943 | VFID 7841  | filamentous hemagglutinin/adhesin [Bordetella pertussis]              | 26.24 | 68.52 | 5.65  |
| p-cluster357293 | VFID 7922  | polysaccharide biosynthesis protein CpsM V [Streptococcus agalactiae] | 21.66 | 38.36 | 83.82 |
