# Supplementary material for: Comparative Genomic Analysis Reveals Gene Content Diversity, Phylogenomic Contour, Putative Virulence Determinants, and Potential Diagnostic Markers within Pythium insidiosum Traits
Source: J Fungi (Basel). 2023 Jan 27;9(2):169. doi: 10.3390/jof9020169 (PMC9962146; doi:10.3390/jof9020169)
Supplement: Supplementary file 1 [file jof-09-00169-s001.zip]

Archive with 4 entries (4 files):
- 221128_Supplementary Figures S1-4 (PDF).pdf
- 221128_Supplementary Table S1 ok (PDF).pdf
- 221128_Supplementary Table S2 (PDF).pdf
- 221128_Supplementary Table S3 (PDF).pdf
